# Supplementary material for: An electrochemical tandem oxidative azidation and intramolecular cyclization strategy for the synthesis of quinoxaline derivatives
Source: Royal Society of Chemistry journal article supplement (doi:10.1039/d3ob00558e), 2023-01-01

# Supporting information

## **An electrochemical tandem oxidative azidation and intramolecular cyclization strategy for the synthesis of quinoxaline derivatives**

Kai Zhou, Shendan Xia, Zhiwei Chen\*

*College of Pharmaceutical Sciences, Zhejiang University of Technology, Hangzhou*

*310014, P.R. China.*

\*Email: [chenzhiwei@zjut.edu.cn](mailto:chenzhiwei@zjut.edu.cn)

### **Table of contents**

|                                                   |     |
|---------------------------------------------------|-----|
| 1. General information                            | S2  |
| 2. Typical experimental procedure                 | S2  |
| 3. Large-scale experimental procedure             | S4  |
| 4. Cyclic voltammetry experiments                 | S4  |
| 5. References                                     | S5  |
| 6. Analytical data of the synthesized derivatives | S5  |
| 7. NMR spectra of products                        | S13 |

## 1. General information

All reagents were obtained from commercial sources and used without further purification unless otherwise indicated. Silica gel for column chromatography was purchased from Qingdao Haiyang Chemical Co., Ltd. Reactions were stirred using Teflon-coated magnetic stir bars. Thin-layer chromatography (TLC) was used to monitor the reaction. Melting points were determined using a Büchi B-540 capillary melting point apparatus.  $^1\text{H}$  NMR (400 MHz),  $^{13}\text{C}$  NMR (100 MHz) and  $^{19}\text{F}$  NMR (376 MHz) spectra were recorded with  $\text{CDCl}_3$ . Chemical shifts are reported downfield from TMS (= 0) for  $^1\text{H}$  NMR. For  $^{13}\text{C}\{^1\text{H}\}$  NMR, chemical shifts are reported in the scale relative to  $\text{CDCl}_3$  (= 77.0). High resolution mass spectrometry (HRMS) analysis was performed on an Agilent 1290–6540 UHPLC Q-ToF HR-MS System (ESI) spectrometer.

## 2. Typical experimental procedure<sup>1-4</sup>

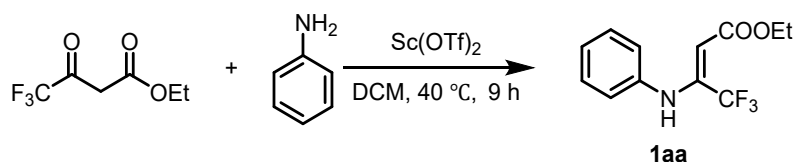

A 50 mL single-mouth flask was charged with ethyl trifluoroacetoacetate (5.0 mmol, 920.5 mg), aniline (7.5 mmol, 698.5 mg),  $\text{DCM}$  (3.0 mL),  $\text{Sc}(\text{OTf})_2$  (0.25 mmol, 123.0 mg). The reaction mixture was stirred at  $40\text{ }^\circ\text{C}$  for 9 hours and monitored by TLC during the reaction. When the reaction was finished, the solution was extracted with diethyl ether ( $2 \times 10\text{ mL}$ ). After the solvent was evaporated under vacuum, The crude products were separated by flash column chromatography on  $\text{Et}_3\text{N}$  pre-treated silica gel using petroleum ether: ethyl ether = (20:1, v/v) as eluent.

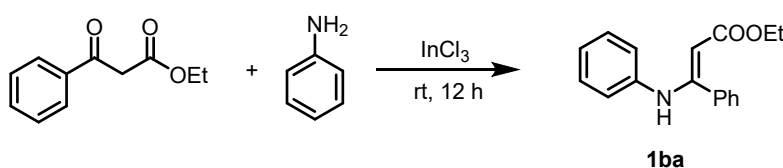

A 50 mL single-mouth flask was charged with ethyl benzoyl acetate (5 mmol, 961.1 mg), aniline (7.5 mmol, 698.5 mg),  $\text{InCl}_3$  (0.5 mmol, 221.2 mg). The reaction mixture was stirred at room temperature for 12 hours and monitored by TLC during the reaction. When the reaction was finished, the solution was extracted with diethyl ether ( $2 \times 10$  mL). After the solvent was evaporated under vacuum, The crude products were separated by flash column chromatography on  $\text{Et}_3\text{N}$  pre-treated silica gel using petroleum ether: ethyl ether = (20:1, v/v) as eluent.

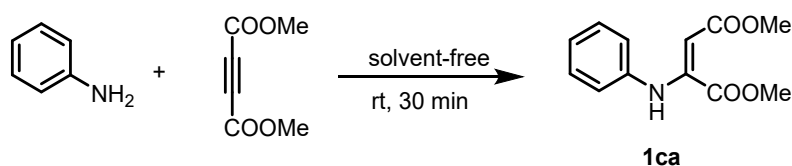

Take a 50 mL single-necked round-bottomed flask that was dried in the oven in advance, add aniline (7.5 mmol, 698.5 mg), then slowly add dimethylacetylenedicarboxylate (5.0 mmol, 710.5 mg), and mix thoroughly to form a uniform paste. The reaction mixture was stirred at room temperature for 30 min and monitor the reaction process by TLC. After the reaction was completed, using petroleum ether/ethyl acetate = (15:1, v/v) as eluent to quickly purify by silica gel column pretreated with  $\text{Et}_3\text{N}$  to obtain the desired product.

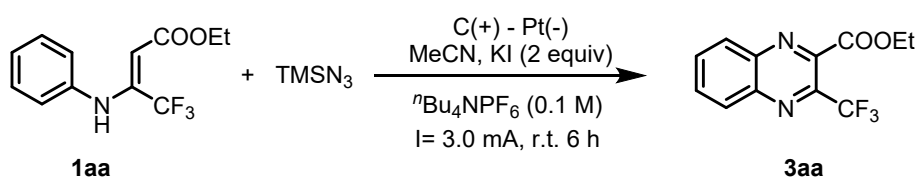

In an oven-dried undivided three-necked bottle added enamine ester **1aa** (0.5 mmol · 122.6 mg), MeCN (5.0 mL),  $\text{TMSN}_3$  (1.0 mmol, 115.0 mg),  $n\text{Bu}_4\text{NPF}_6$  (0.5 mmol, 193.5 mg), KI (1.0 mmol, 166.0 mg). The bottle was equipped with platinum plate (20 mm  $\times$  15 mm) as the anode and platinum plate (20 mm  $\times$  15 mm) as the cathode. The reaction mixture was stirred and electrolyzed at a constant current of 3.0 mA for 6 hours at room temperature. When the reaction was finished, the solution was extracted with diethyl ether ( $3 \times 10$  mL). After the solvent was evaporated under

vacuum, the residues were purified by flash column chromatography on silica gel (petroleum ether: ethyl ether = 10:1, v/v) to give the desired product.

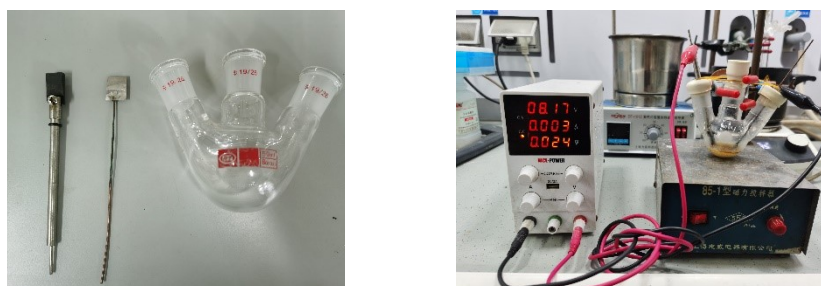

**Figure S1.** Electrolysis setup

### 3. Large-scale experimental procedure

In an oven-dried undivided three-necked bottle added enamine ester **1aa** (5.0 mmol, 1.23 g), MeCN (20.0 mL), TMSN<sub>3</sub> (10.0 mmol, 1.12 g), <sup>n</sup>Bu<sub>4</sub>NPF<sub>6</sub> (5.0 mmol, 1.94 g), KI (10.0 mmol, 1.66 g). The bottle was equipped with platinum plate (20 mm × 15 mm) as the anode and platinum plate (20 mm × 15 mm) as the cathode. The reaction mixture was stirred and electrolyzed at a constant current of 6.0 mA for 16 hours at room temperature. When the reaction was finished, the solution was extracted with diethyl ether (3 × 20 mL). After the solvent was evaporated under vacuum, the residues were purified by flash column chromatography on silica gel (petroleum ether: ethyl ether = 10:1, v/v) to give the desired product.

### 4. Cyclic voltammetry experiments

Cyclic voltammetry was performed in a three-electrode bottle (10.0 mL) by electrochemical analyzer at room temperature. The working electrode was a steady glassy carbon disk electrode, the counter electrode a platinum wire. The reference was an Ag/AgCl electrode submerged in saturated aqueous KCl solution. In all experiments, 10 mL of CH<sub>3</sub>CN containing 0.1 M <sup>n</sup>Bu<sub>4</sub>NPF<sub>6</sub> were poured into the electrochemical cell. The scan rate is 0.04 V/s, ranging from 0.0 V to 2.0 V.

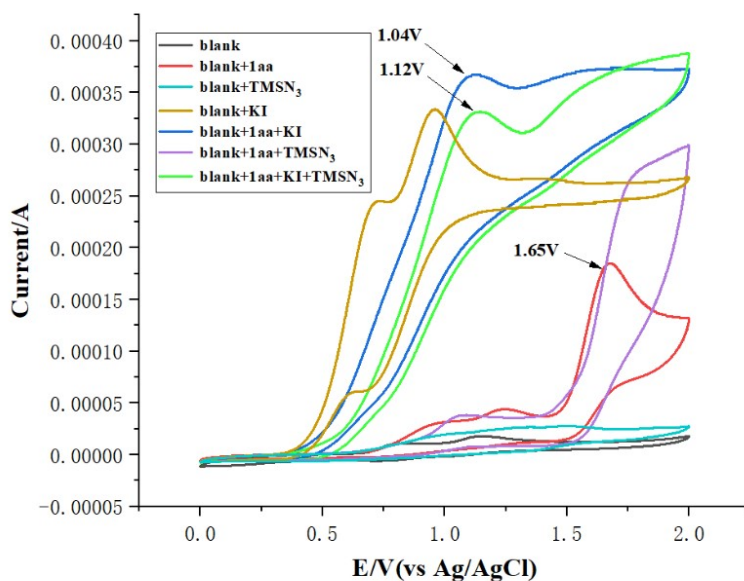

## 5. References

1. J. S. Yadav, V. N. Kumar, R. S. Rao, A. D. Priyadarshini, P. P. Rao, B. V. S. Reddy and K. Nagaiah, *J. Mol. Catal. A: Chem.*, 2006, **256**, 234-237.
2. D. Ramanathan and K. Pitchumani, *Eur. J. Org. Chem.*, 2015, **2015**, 463-467.
3. H. Ma, D. Li and W. Yu, *Org. Lett.*, 2016, **18**, 868-871.
4. G. Choudhary and R. K. Peddinti, *Green Chem.*, 2011, **13**, 3290-3299.

## 6. Analytical data of the synthesized derivatives

### ethyl -4,4,4-trifluoro-2-imino-3-(phenylimino)butanoate (2aa)

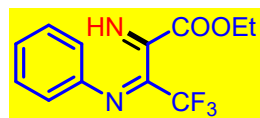

Yellow oil;  $^1\text{H NMR}$  (400 MHz,  $\text{CDCl}_3$ )  $\delta$  12.06 (s, 1H), 7.32 (t,  $J = 7.7$  Hz, 2H), 7.20 (t,  $J = 7.4$  Hz, 1H), 6.93 (d,  $J = 7.4$  Hz, 2H), 4.04 (q,  $J = 7.2$  Hz, 2H), 1.09 (t,  $J = 7.2$  Hz, 3H).  $^{13}\text{C NMR}$  (100 MHz,  $\text{CDCl}_3$ )  $\delta$  162.0, 157.1, 152.4 (q,  $^2J_{\text{C-F}} = 35.7$  Hz), 145.9, 129.1, 127.1, 120.6, 118.8 (q,  $^1J_{\text{C-F}} = 279.1$  Hz), 63.4, 13.5.  $^{19}\text{F NMR}$  (376 MHz,  $\text{CDCl}_3$ )  $\delta$  -69.61.

HRMS-ESI (m/z): calcd for  $\text{C}_{12}\text{H}_{12}\text{F}_3\text{N}_2\text{O}_2^+ [\text{M}+\text{H}]^+$  273.0845, found 273.0846.

**ethyl 3-(trifluoromethyl)quinoxaline-2-carboxylate (3aa)**

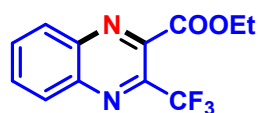

White solid; m.p. = 48.3-49.5 °C; 70% yield; <sup>1</sup>H NMR (400 MHz, CDCl<sub>3</sub>) δ 8.27 (m, 2H), 7.98 (m, 2H), 4.58 (q, *J* = 7.2 Hz, 1H), 1.48 (t, *J* = 7.2 Hz, 1H). <sup>13</sup>C NMR (100 MHz, CDCl<sub>3</sub>) δ 164.2, 143.6, 141.7, 140.5, 140.2 (q, <sup>2</sup>*J*<sub>C-F</sub> = 36.6 Hz), 133.2, 132.8, 129.8, 129.6, 120.6 (q, <sup>1</sup>*J*<sub>C-F</sub> = 275.8 Hz), 63.2, 13.9. <sup>19</sup>F NMR (376 MHz, CDCl<sub>3</sub>) δ -64.4.

HRMS-ESI (m/z): calcd for C<sub>12</sub>H<sub>10</sub>F<sub>3</sub>N<sub>2</sub>O<sub>2</sub><sup>+</sup> [M+H]<sup>+</sup> 271.0689, found 271.0691

**ethyl 7-methoxy-3-(trifluoromethyl)quinoxaline-2-carboxylate (3ab)**

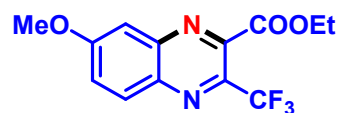

Yellow viscous oil; 74% yield; <sup>1</sup>H NMR (400 MHz, CDCl<sub>3</sub>) δ 8.04 (d, *J* = 9.2 Hz, 1H), 7.51 (dd, *J* = 9.2, 3.0 Hz, 1H), 7.42 (d, *J* = 2.8 Hz, 1H), 4.48 (q, *J* = 7.2 Hz, 2H), 3.93 (s, 2H), 1.39 (t, *J* = 7.2 Hz, 3H). <sup>13</sup>C NMR (100 MHz, CDCl<sub>3</sub>) δ 164.4, 163.3, 143.9, 143.7, 137.8 (q, <sup>2</sup>*J*<sub>C-F</sub> = 36.2 Hz, CF<sub>3</sub>), 137.0, 130.7, 126.8, 122.3 (q, <sup>1</sup>*J*<sub>C-F</sub> = 275.8 Hz, CF<sub>3</sub>), 106.3, 63.1, 56.2, 13.9. <sup>19</sup>F NMR (376 MHz, CDCl<sub>3</sub>) δ -64.0.

HRMS-ESI (m/z): calcd for C<sub>13</sub>H<sub>12</sub>F<sub>3</sub>N<sub>2</sub>O<sub>3</sub><sup>+</sup> [M+H]<sup>+</sup> 301.0795, found 301.0796

**ethyl 7-methyl-3-(trifluoromethyl)quinoxaline-2-carboxylate (3ac)**

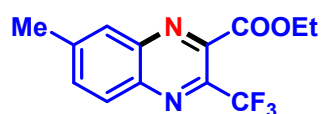

Yellow viscous oil; 72% yield; <sup>1</sup>H NMR (400 MHz, CDCl<sub>3</sub>) δ 8.06 (m, 1H), 7.95 (s, 1H), 7.72 (m, 2H), 4.49 (q, *J* = 7.2 Hz, 2H), 2.59 (s, 3H), 1.39 (t, *J* = 7.2 Hz, 3H). <sup>13</sup>C NMR (100 MHz, CDCl<sub>3</sub>) δ 164.4, 144.6, 143.6, 141.8, 140.8 (q, <sup>2</sup>*J*<sub>C-F</sub> = 36.0 Hz, CF<sub>3</sub>), 139.1, 135.2, 129.3, 128.3, 122.2 (q, <sup>1</sup>*J*<sub>C-F</sub> = 275.8 Hz, CF<sub>3</sub>), 63.1, 22.1, 13.9. <sup>19</sup>F NMR (376 MHz, CDCl<sub>3</sub>) δ -64.3.

HRMS-ESI (m/z): calcd for C<sub>13</sub>H<sub>12</sub>F<sub>3</sub>N<sub>2</sub>O<sub>2</sub><sup>+</sup> [M+H]<sup>+</sup> 285.0845, found 285.0846

**ethyl 7-chloro-3-(trifluoromethyl)quinoxaline-2-carboxylate (3ad)**

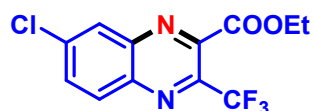

Yellow oil; 46% yield;  $^1\text{H}$  NMR (400 MHz,  $\text{CDCl}_3$ )  $\delta$  8.22 – 8.09 (m, 2H), 7.85 (m, 1H), 4.50 (q,  $J = 7.2$  Hz, 2H), 1.40 (t,  $J = 7.2$  Hz, 3H).  $^{13}\text{C}$  NMR (100 MHz,  $\text{CDCl}_3$ )  $\delta$  163.8, 144.5, 142.0, 140.6 (q,  $^2J_{\text{C-F}} = 36.7$  Hz,  $\text{CF}_3$ ), 139.6, 139.1, 134.0, 131.0, 128.5, 120.5 (q,  $^1J_{\text{C-F}} = 275.8$  Hz,  $\text{CF}_3$ ), 63.4, 13.9.  $^{19}\text{F}$  NMR (376 MHz,  $\text{CDCl}_3$ )  $\delta$  -64.5.

HRMS-ESI (m/z): calcd for  $\text{C}_{12}\text{H}_9\text{ClF}_3\text{N}_2\text{O}_2^+ [\text{M}+\text{H}]^+$  305.0299, found 305.0298

**ethyl 7-bromo-3-(trifluoromethyl)quinoxaline-2-carboxylate (3ae)**

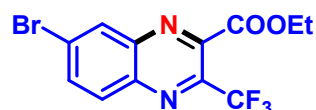

Yellow oil; 48% yield;  $^1\text{H}$  NMR (400 MHz,  $\text{CDCl}_3$ )  $\delta$  8.46 (d,  $J = 2.6$  Hz, 1H), 8.16 – 8.00 (m, 2H), 4.57 (q,  $J = 7.2$  Hz, 2H), 1.47 (t,  $J = 7.2$  Hz, 3H).  $^{13}\text{C}$  NMR (100 MHz,  $\text{CDCl}_3$ )  $\delta$  163.8, 144.5, 142.1, 140.6 (q,  $^2J_{\text{C-F}} = 36.7$  Hz,  $\text{CF}_3$ ), 139.3, 136.5, 131.9, 131.0, 128.0, 120.5 (q,  $^1J_{\text{C-F}} = 275.8$  Hz,  $\text{CF}_3$ ), 63.4, 13.9.  $^{19}\text{F}$  NMR (376 MHz,  $\text{CDCl}_3$ )  $\delta$  -64.5.

HRMS-ESI (m/z): calcd for  $\text{C}_{12}\text{H}_9\text{BrF}_3\text{N}_2\text{O}_2^+ [\text{M}+\text{H}]^+$  348.9794, found 348.9795

**ethyl 5-methyl-3-(trifluoromethyl)quinoxaline-2-carboxylate (3af)**

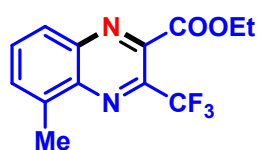

Yellow oil; 46% yield;  $^1\text{H}$  NMR (400 MHz,  $\text{CDCl}_3$ )  $\delta$  8.02 (d,  $J = 8.4$  Hz, 1H), 7.79 (t,  $J = 7.8$  Hz, 1H), 7.71 (d,  $J = 7.2$  Hz, 1H), 4.50 (q,  $J = 7.2$  Hz, 2H), 2.77 (s, 3H), 1.40 (t,  $J = 7.2$  Hz, 3H).  $^{13}\text{C}$  NMR (100 MHz,  $\text{CDCl}_3$ )  $\delta$  164.4, 143.1, 141.9, 139.8, 139.2 (q,  $^2J_{\text{C-F}} = 36.0$  Hz,  $\text{CF}_3$ ), 139.0, 133.0, 132.5, 127.3, 120.8 (q,  $^1J_{\text{C-F}} = 275.8$  Hz,  $\text{CF}_3$ ), 63.1, 16.9, 13.9.  $^{19}\text{F}$  NMR (376 MHz,  $\text{CDCl}_3$ )  $\delta$  -64.3.

HRMS-ESI (m/z): calcd for  $\text{C}_{13}\text{H}_{12}\text{F}_3\text{N}_2\text{O}_2^+ [\text{M}+\text{H}]^+$  285.0845, found 284.0846

**ethyl 5-chloro-3-(trifluoromethyl)quinoxaline-2-carboxylate (3ag)**

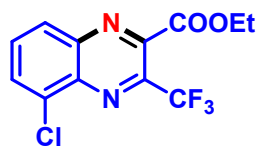

Yellow oil; 41% yield;  $^1\text{H}$  NMR (400 MHz,  $\text{CDCl}_3$ )  $\delta$  8.20 (d,  $J = 8.4$  Hz, 1H), 8.08 (d,  $J = 7.6$  Hz, 1H), 7.90 (t,  $J = 8.2$  Hz, 1H), 4.58 (q,  $J = 7.4$  Hz, 2H), 1.47 (t,  $J = 7.2$  Hz, 3H).  $^{13}\text{C}$  NMR (100 MHz,  $\text{CDCl}_3$ )  $\delta$  163.8, 144.3, 142.7, 140.2 (q,  $^2J_{\text{C-F}} = 36.2$  Hz,  $\text{CF}_3$ ), 137.6, 134.3, 132.9, 132.5, 128.5, 120.5 (q,  $^1J_{\text{C-F}} = 275.8$  Hz,  $\text{CF}_3$ ), 63.4, 13.9.  $^{19}\text{F}$  NMR (376 MHz,  $\text{CDCl}_3$ )  $\delta$  -64.3.

HRMS-ESI (m/z): calcd for  $\text{C}_{12}\text{H}_9\text{ClF}_3\text{N}_2\text{O}_2^+$   $[\text{M}+\text{H}]^+$  305.0299, found 305.0298

**ethyl 6-methyl-3-(trifluoromethyl)quinoxaline-2-carboxylate (3ah)**

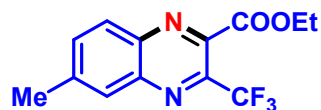

Yellow solid; m.p. = 58.2-59.3 °C; 43% yield;  $^1\text{H}$  NMR (400 MHz,  $\text{CDCl}_3$ )  $\delta$  7.81 (d,  $J = 2.0$  Hz, 1H), 7.73 (d,  $J = 7.6$  Hz, 1H), 7.35 – 7.25 (m, 1H), 4.39 (q,  $J = 7.2$  Hz, 2H), 2.38 (s, 3H), 1.38 (t,  $J = 7.2$  Hz, 3H).  $^{13}\text{C}$  NMR (100 MHz,  $\text{CDCl}_3$ )  $\delta$  159.3, 148.2, 139.0, 135.6 (q,  $^2J_{\text{C-F}} = 35.6$  Hz,  $\text{CF}_3$ ), 131.4, 128.8, 127.8, 127.2, 123.2, 120.8 (q,  $^1J_{\text{C-F}} = 269.1$  Hz,  $\text{CF}_3$ ), 62.3, 21.2, 13.9.  $^{19}\text{F}$  NMR (376 MHz,  $\text{CDCl}_3$ )  $\delta$  -61.1.

HRMS-ESI (m/z): calcd for  $\text{C}_{13}\text{H}_{12}\text{F}_3\text{N}_2\text{O}_2^+$   $[\text{M}+\text{H}]^+$  285.0845, found 285.0846

**ethyl 2-(trifluoromethyl)benzo[f]quinoxaline-3-carboxylate (3aj)**

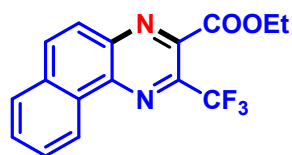

Yellow viscous oil; 47% yield;  $^1\text{H}$  NMR (400 MHz,  $\text{CDCl}_3$ )  $\delta$  9.31 – 9.21 (m, 1H), 8.22 (d,  $J = 9.0$  Hz, 1H), 8.09 – 7.97 (m, 2H), 7.90 – 7.83 (m, 2H), 4.59 (q,  $J = 7.2$  Hz, 2H), 1.49 (t,  $J = 7.2$  Hz, 3H).  $^{13}\text{C}$  NMR (100 MHz,  $\text{CDCl}_3$ )  $\delta$  164.5, 135.6 (q,  $^2J_{\text{C-F}} = 35.6$  Hz,  $\text{CF}_3$ ), 135.3, 134.0, 133.1, 130.6, 129.9, 128.9, 128.9, 128.7, 128.3, 125.8, 125.4, 120.8 (q,  $^1J_{\text{C-F}} = 269.1$  Hz), 63.2, 14.0.  $^{19}\text{F}$  NMR (376 MHz,  $\text{CDCl}_3$ )  $\delta$  -63.9.

HRMS-ESI (m/z): calcd for  $\text{C}_{16}\text{H}_{12}\text{F}_3\text{N}_2\text{O}_2^+$   $[\text{M}+\text{H}]^+$  321.0845, found 321.0844



**ethyl 7,8-dimethyl-3-(trifluoromethyl)quinoxaline-2-carboxylate (3al)**

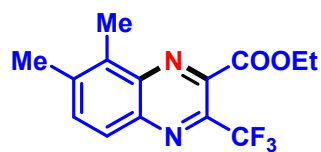

Yellow viscous oil; 41% yield;  $^1\text{H}$  NMR (400 MHz,  $\text{CDCl}_3$ )  $\delta$  8.00 (d,  $J = 8.6$  Hz, 1H), 7.78 (d,  $J = 8.7$  Hz, 1H), 4.56 (q,  $J = 7.2$  Hz, 2H), 2.77 (s, 4H), 2.59 (s, 4H), 1.47 (t,  $J = 7.0$  Hz, 3H).  $^{13}\text{C}$  NMR (100 MHz,  $\text{CDCl}_3$ )  $\delta$  164.5, 144.7, 144.2, 142.8 (q,  $^2J_{\text{C-F}} = 36.0$  Hz,  $\text{CF}_3$ ), 129.9, 129.7, 128.6, 128.5, 125.2 (q,  $^1J_{\text{C-F}} = 275.8$  Hz,  $\text{CF}_3$ ), 119.5, 117.2, 63.1, 20.7, 20.6, 13.9.  $^{19}\text{F}$  NMR (376 MHz,  $\text{CDCl}_3$ )  $\delta$  -67.3.

HRMS-ESI (m/z): calcd for  $\text{C}_{14}\text{H}_{14}\text{F}_3\text{N}_2\text{O}_2^+$   $[\text{M}+\text{H}]^+$  299.1002, found 299.1004

**ethyl 3-phenylquinoxaline-2-carboxylate (3ba)**

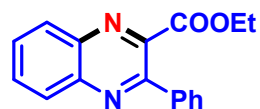

Yellow solid; m.p.= 65.1-66.7 °C; 71% yield;  $^1\text{H}$  NMR (400 MHz,  $\text{CDCl}_3$ )  $\delta$  8.2 (dd,  $J = 13.7, 8.2$  Hz, 2H), 7.9 – 7.7 (m, 4H), 7.5 (q,  $J = 2.9, 2.4$  Hz, 3H), 4.3 (q,  $J = 7.2$  Hz, 2H), 1.2 – 1.1 (m, 3H).  $^{13}\text{C}$  NMR (100 MHz,  $\text{CDCl}_3$ )  $\delta$  166.6, 152.3, 145.7, 142.2, 139.9, 137.8, 131.7, 130.5, 129.6, 129.3, 128.6, 128.5, 62.4, 13.7.

HRMS-ESI (m/z): calcd for  $\text{C}_{17}\text{H}_{15}\text{N}_2\text{O}_2^+$   $[\text{M}+\text{H}]^+$  279.1128, found 279.1127

**ethyl 7-chloro-3-phenylquinoxaline-2-carboxylate (3bd)**

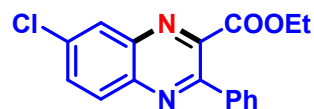

Yellow solid; m.p.= 91.1-92.8 °C; 59% yield;  $^1\text{H}$  NMR (400 MHz,  $\text{CDCl}_3$ )  $\delta$  8.21 (d,  $J = 2.3$  Hz, 1H), 8.12 (d,  $J = 9.0$  Hz, 1H), 7.80 (dd,  $J = 9.0, 2.3$  Hz, 1H), 7.76 – 7.71 (m, 2H), 7.55 – 7.49 (m, 3H), 4.34 (q,  $J = 7.1$  Hz, 2H), 1.18 (t,  $J = 7.1$  Hz, 3H).  $^{13}\text{C}$  NMR (100 MHz,  $\text{CDCl}_3$ )  $\delta$  166.3, 152.3, 146.5, 140.7, 140.1, 137.3, 136.4, 132.7, 130.5, 129.8, 128.7, 128.5, 128.3, 62.5, 13.7.

HRMS-ESI (m/z): calcd for  $\text{C}_{17}\text{H}_{14}\text{ClN}_2\text{O}_2^+$   $[\text{M}+\text{H}]^+$  313.0738, found 313.0736

**ethyl 7-bromo-3-phenylquinoxaline-2-carboxylate (3be)**

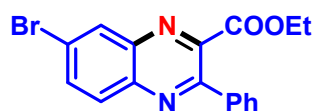

Yellow solid; m.p.= 103.1-104.8 °C; 58% yield; <sup>1</sup>H NMR (400 MHz, CDCl<sub>3</sub>) δ 8.40 (d, *J* = 2.2 Hz, 1H), 8.05 (d, *J* = 9.0 Hz, 1H), 7.93 (dd, *J* = 9.0, 2.1 Hz, 1H), 7.74 (ddt, *J* = 5.2, 3.0, 1.4 Hz, 2H), 7.57 – 7.48 (m, 3H), 4.34 (q, *J* = 7.0 Hz, 2H), 1.19 (t, *J* = 7.0 Hz, 3H). <sup>13</sup>C NMR (100 MHz, CDCl<sub>3</sub>) δ 166.3, 152.4, 146.5, 141.0, 140.4, 137.3, 135.2, 131.7, 130.6, 129.8, 128.7, 128.5, 124.5, 62.5, 13.6.

HRMS-ESI (m/z): calcd for C<sub>17</sub>H<sub>14</sub>BrN<sub>2</sub>O<sub>2</sub><sup>+</sup> [M+H]<sup>+</sup> 357.0233, found 357.0235

**ethyl 7-fluoro-3-phenylquinoxaline-2-carboxylate (3bm)**

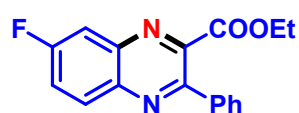

Yellow solid; m.p.= 76.2-77.3 °C; 57% yield; <sup>1</sup>H NMR (400 MHz, CDCl<sub>3</sub>) δ 8.20 (dd, *J* = 9.2, 5.7 Hz, 1H), 7.84 (dd, *J* = 8.9, 2.8 Hz, 1H), 7.80 – 7.60 (m, 3H), 7.55 – 7.49 (m, 3H), 4.34 (q, *J* = 7.2 Hz, 2H), 1.18 (t, *J* = 7.1 Hz, 3H). <sup>13</sup>C NMR (100 MHz, CDCl<sub>3</sub>) δ 166.4, 163.0 (d, *J* = 253.8 Hz), 151.6, 151.5, 146.5, 140.7, 140.6, 139.5, 137.4, 131.5, 131.4, 129.7, 128.7, 128.5, 122.4, 122.1, 113.1, 112.8, 62.5, 13.7.

HRMS-ESI (m/z): calcd for C<sub>17</sub>H<sub>14</sub>FN<sub>2</sub>O<sub>2</sub><sup>+</sup> [M+H]<sup>+</sup> 297.1034, found 297.1033

**ethyl 5-methyl-3-phenylquinoxaline-2-carboxylate (3bf)**

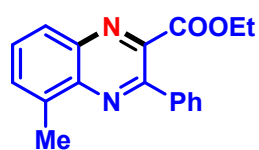

Yellow oil; 58% yield; <sup>1</sup>H NMR (400 MHz, CDCl<sub>3</sub>) δ 8.08 – 8.00 (m, 1H), 7.84 – 7.75 (m, 2H), 7.74 – 7.65 (m, 2H), 7.57 – 7.46 (m, 3H), 4.34 (q, *J* = 7.1 Hz, 2H), 2.85 (s, 3H), 1.19 (t, *J* = 7.2 Hz, 3H). <sup>13</sup>C NMR (100 MHz, CDCl<sub>3</sub>) δ 167.0, 150.7, 145.1, 141.4, 139.9, 138.1, 137.8, 131.4, 130.2, 129.5, 128.8, 128.5, 127.3, 62.3, 17.1, 13.7.

HRMS-ESI (m/z): calcd for C<sub>18</sub>H<sub>17</sub>N<sub>2</sub>O<sub>2</sub><sup>+</sup> [M+H]<sup>+</sup> 293.1285, found 293.1286

**ethyl 5-chloro-3-phenylquinoxaline-2-carboxylate (3bg)**

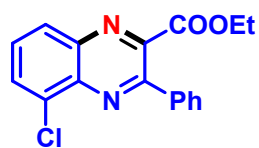

Yellow solid; m.p. = 117.5–120.3 °C; 57% yield; <sup>1</sup>H NMR (400 MHz, CDCl<sub>3</sub>) δ 8.14 (dd, *J* = 8.4, 1.3 Hz, 1H), 7.96 (dd, *J* = 7.6, 1.3 Hz, 1H), 7.83 (dd, *J* = 6.6, 2.9 Hz, 2H), 7.74 (t, *J* = 8.0 Hz, 1H), 7.53 (q, *J* = 2.9 Hz, 3H), 4.36 (q, *J* = 7.1 Hz, 2H), 1.20 (t, *J* = 7.1 Hz, 3H). <sup>13</sup>C NMR (101 MHz, CDCl<sub>3</sub>) δ 166.4, 152.3, 146.3, 140.7, 139.0, 137.2, 133.4, 131.4, 130.1, 130.0, 128.9, 128.7, 128.5, 62.6, 13.7. HRMS-ESI (*m/z*): calcd for C<sub>17</sub>H<sub>14</sub>ClN<sub>2</sub>O<sub>2</sub><sup>+</sup> [M+H]<sup>+</sup> 313.0738, found 313.0737

**ethyl 3-(4-fluorophenyl)quinoxaline-2-carboxylate (3bn)**

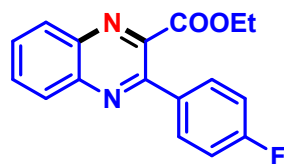

Yellow solid; m.p. = 147.1–148.9 °C; 55% yield; <sup>1</sup>H NMR (400 MHz, CDCl<sub>3</sub>) δ 8.20 (ddd, *J* = 19.6, 8.2, 1.8 Hz, 1H), 7.91 – 7.80 (m, 1H), 7.78 – 7.72 (m, 1H), 7.21 (t, *J* = 8.6 Hz, 1H), 4.37 (q, *J* = 7.2 Hz, 1H), 1.24 (t, *J* = 7.2 Hz, 1H). <sup>13</sup>C NMR (100 MHz, CDCl<sub>3</sub>) δ 166.5, 163.8 (d, *J* = 250.0 Hz), 151.1, 145.5, 142.2, 139.9, 133.9, 131.8, 130.6, 130.6, 129.6, 129.3, 115.9, 115.6, 62.5, 13.8. <sup>19</sup>F NMR (376 MHz, CDCl<sub>3</sub>) δ -111.3. HRMS-ESI (*m/z*): calcd for C<sub>17</sub>H<sub>14</sub>FN<sub>2</sub>O<sub>2</sub><sup>+</sup> [M+H]<sup>+</sup> 297.1034, found 297.1035

**dimethyl quinoxaline-2,3-dicarboxylate (3ca)**

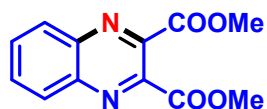

White solid; m.p. = 122.1–124.5 °C; 66% yield; <sup>1</sup>H NMR (400 MHz, CDCl<sub>3</sub>) δ 8.27 (dd, *J* = 6.4, 3.4 Hz, 2H), 7.96 (dd, *J* = 6.4, 3.4 Hz, 2H), 4.10 (s, 6H). <sup>13</sup>C NMR (100 MHz, CDCl<sub>3</sub>) δ 165.1, 143.8, 141.4, 132.7, 129.9, 53.6. HRMS-ESI (*m/z*): calcd for C<sub>12</sub>H<sub>11</sub>N<sub>2</sub>O<sub>4</sub><sup>+</sup> [M+H]<sup>+</sup> 247.0713, found 247.0715

**dimethyl 6-methylquinoxaline-2,3-dicarboxylate (3cc)**

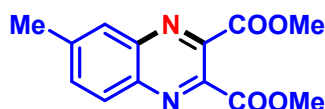

Yellow solid; m.p.= 84.4-85.4 °C; 69% yield; <sup>1</sup>H NMR (400 MHz, CDCl<sub>3</sub>) δ 8.14 (d, *J* = 8.6 Hz, 1H), 8.01 (dt, *J* = 1.8, 0.8 Hz, 1H), 7.77 (dd, *J* = 8.6, 1.8 Hz, 1H), 4.09 (s, 6H), 2.65 (s, 3H). <sup>13</sup>C NMR (100 MHz, CDCl<sub>3</sub>) δ 165.3, 165.1, 144.0, 143.9, 142.5, 141.4, 139.8, 135.0, 129.2, 128.4, 53.4, 53.4, 22.0. HRMS-ESI (*m/z*): calcd for C<sub>13</sub>H<sub>13</sub>N<sub>2</sub>O<sub>4</sub><sup>+</sup> [M+H]<sup>+</sup> 261.0870, found 261.0869

#### dimethyl 6-chloroquinoxaline-2,3-dicarboxylate (3cd)

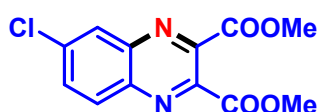

Brown white solid; m.p.= 78.1-80.3 °C; 68% yield; <sup>1</sup>H NMR (400 MHz, CDCl<sub>3</sub>) δ 8.27 – 8.16 (m, 2H), 7.88 (dd, *J* = 9.0, 2.2 Hz, 1H), 4.09 (d, *J* = 1.0 Hz, 6H). <sup>13</sup>C NMR (100 MHz, CDCl<sub>3</sub>) δ 164.9, 164.7, 144.9, 143.5, 141.6, 139.9, 139.0, 133.8, 131.0, 128.6, 53.6.

HRMS-ESI (*m/z*): calcd for C<sub>12</sub>H<sub>10</sub>ClN<sub>2</sub>O<sub>4</sub><sup>+</sup> [M+H]<sup>+</sup> 281.0324, found 281.0327

#### dimethyl 6-bromoquinoxaline-2,3-dicarboxylate (3ce)

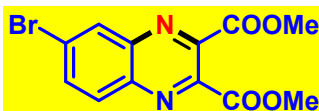

Yellow solid; m.p.= 99.6-100.3 °C; 65% yield; <sup>1</sup>H NMR (400 MHz, CDCl<sub>3</sub>) δ 8.44 (d, *J* = 2.0 Hz, 1H), 8.13 (d, *J* = 9.0 Hz, 1H), 8.01 (dd, *J* = 9.0, 2.0 Hz, 1H), 4.09 (s, 6H). <sup>13</sup>C NMR (100 MHz, CDCl<sub>3</sub>) δ 164.9, 164.8, 144.8, 143.7, 141.8, 140.1, 136.3, 132.1, 131.0, 127.4, 53.7.

HRMS-ESI (*m/z*): calcd for C<sub>12</sub>H<sub>10</sub>BrN<sub>2</sub>O<sub>4</sub><sup>+</sup> [M+H]<sup>+</sup> 324.9818, found 324.9816

#### dimethyl 5-methylquinoxaline-2,3-dicarboxylate (3cf)

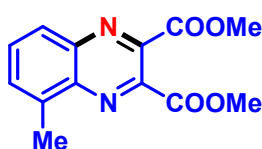

Yellow solid; m.p.= 111.9-112.8 °C; 61% yield; <sup>1</sup>H NMR (400 MHz, CDCl<sub>3</sub>) δ 8.08 (dd, *J* = 8.4, 1.6 Hz, 1H), 7.85 – 7.73 (m, 2H), 4.08 (d, *J* = 3.0 Hz, 6H), 2.84 (s, 3H). <sup>13</sup>C NMR (100 MHz, CDCl<sub>3</sub>) δ 165.7, 165.1, 143.4, 142.4, 141.4, 140.7, 138.6, 132.5, 132.2, 127.6, 53.5, 53.3, 17.0.

HRMS-ESI (m/z): calcd for  $C_{13}H_{13}N_2O_4^+$  [M+H]<sup>+</sup> 261.0870, found 261.0869

#### diethyl quinoxaline-2,3-dicarboxylate (3da)

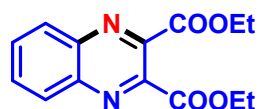

White solid; m.p.= 128.3-130.6 °C; 65% yield; <sup>1</sup>H NMR (400 MHz, CDCl<sub>3</sub>) δ 8.3 (dt, *J* = 6.5, 3.2 Hz, 2H), 7.9 (dq, *J* = 6.4, 3.0 Hz, 2H), 4.6 (q, *J* = 7.1 Hz, 4H), 1.5 (t, *J* = 7.2 Hz, 6H). <sup>13</sup>C NMR (100 MHz, CDCl<sub>3</sub>) δ 164.7, 144.1, 141.3, 132.4, 129.8, 62.8, 14.0.

HRMS-ESI (m/z): calcd for  $C_{14}H_{15}N_2O_4^+$  [M+H]<sup>+</sup> 275.1026, found 275.1027

#### diethyl 6-chloroquinoxaline-2,3-dicarboxylate (3dd)

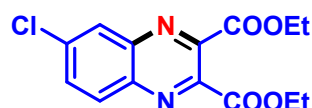

Brown solid; m.p.= 118.6-120.7 °C; 69% yield; <sup>1</sup>H NMR (400 MHz, CDCl<sub>3</sub>) δ 7.16 – 7.07 (m, 2H), 6.63 – 6.56 (m, 2H), 4.25 – 4.11 (m, 4H), 1.25 (t, *J* = 7.2 Hz, 6H). <sup>13</sup>C NMR (100 MHz, CDCl<sub>3</sub>) δ 164.5, 164.4, 145.3, 144.0, 141.6, 139.9, 138.7, 133.5, 131.0, 128.6, 63.0, 14.1, 14.0.

HRMS-ESI (m/z): calcd for  $C_{14}H_{14}ClN_2O_4^+$  [M+H]<sup>+</sup> 309.0637, found 309.0638

#### diethyl 5-chloroquinoxaline-2,3-dicarboxylate (3dg)

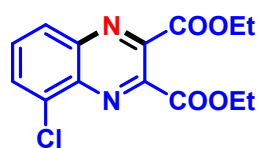

Brown solid; m.p.= 90.5-92.7 °C; 67% yield; <sup>1</sup>H NMR (400 MHz, CDCl<sub>3</sub>) δ 8.2 (dd, *J* = 8.4, 1.2 Hz, 0H), 8.0 (dd, *J* = 7.6, 1.4 Hz, 0H), 7.8 (dd, *J* = 8.4, 7.6 Hz, 0H), 4.6 (q, *J* = 7.2 Hz, 1H), 1.5 (t, *J* = 7.2 Hz, 1H). <sup>13</sup>C NMR (100 MHz, CDCl<sub>3</sub>) δ 164.5, 164.3, 144.8, 144.4, 142.2, 138.3, 134.0, 132.3, 132.0, 128.8, 63.0, 62.9, 14.1, 14.0.

HRMS-ESI (m/z): calcd for  $C_{14}H_{14}ClN_2O_4^+$  [M+H]<sup>+</sup> 309.0637, found 309.0639

## 7. NMR spectra of products

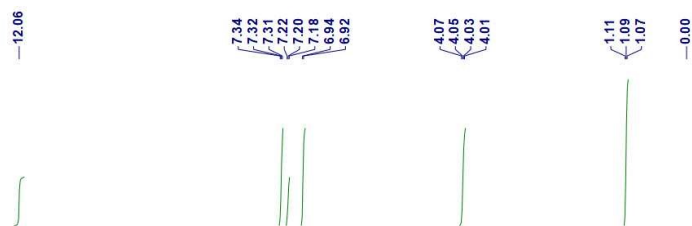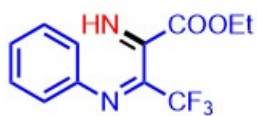

2aa <sup>1</sup>H NMR (400 MHz, CDCl<sub>3</sub>)

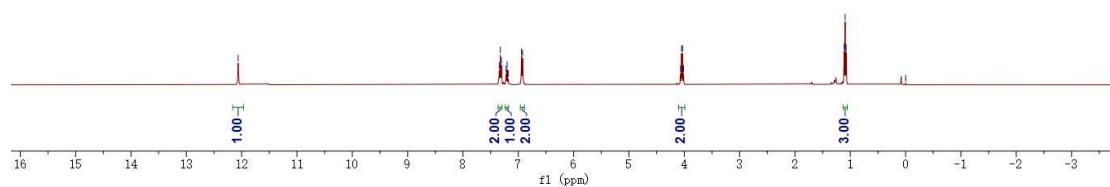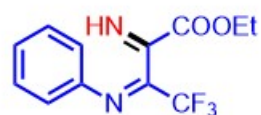

2aa <sup>13</sup>C NMR (100 MHz, CDCl<sub>3</sub>)

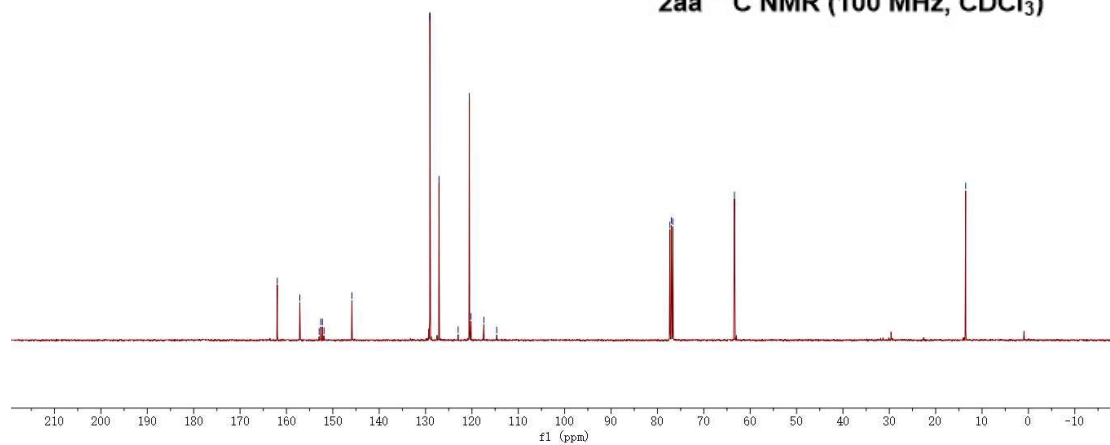

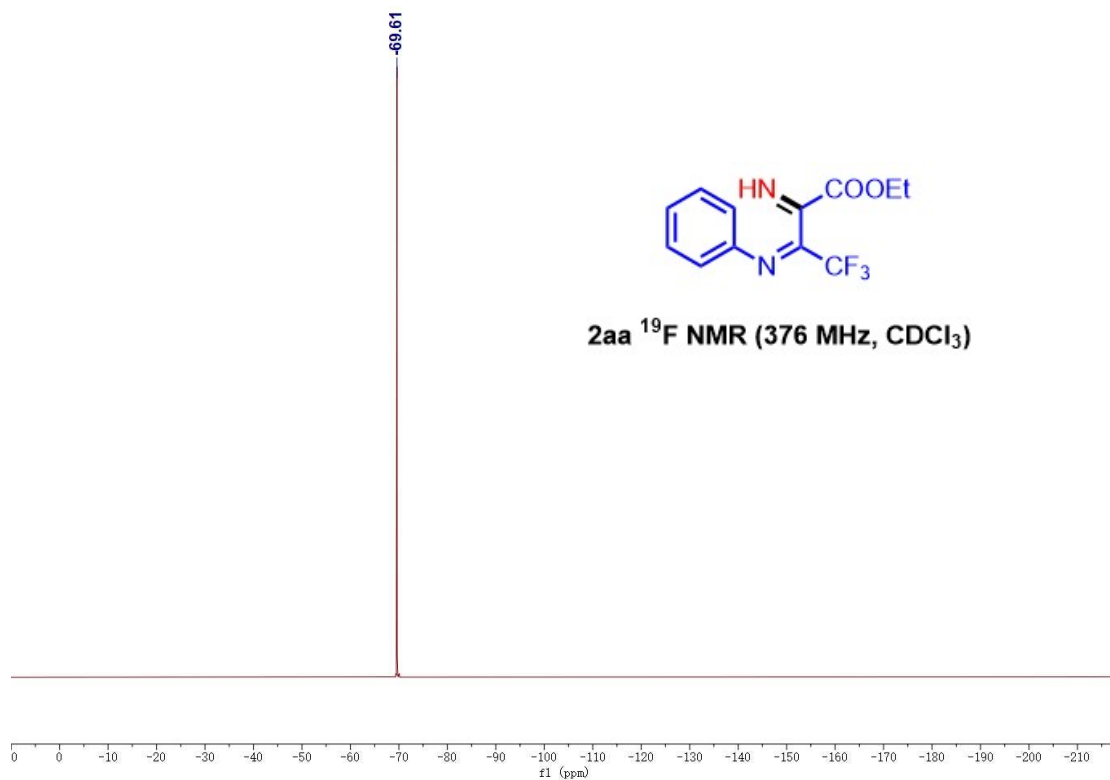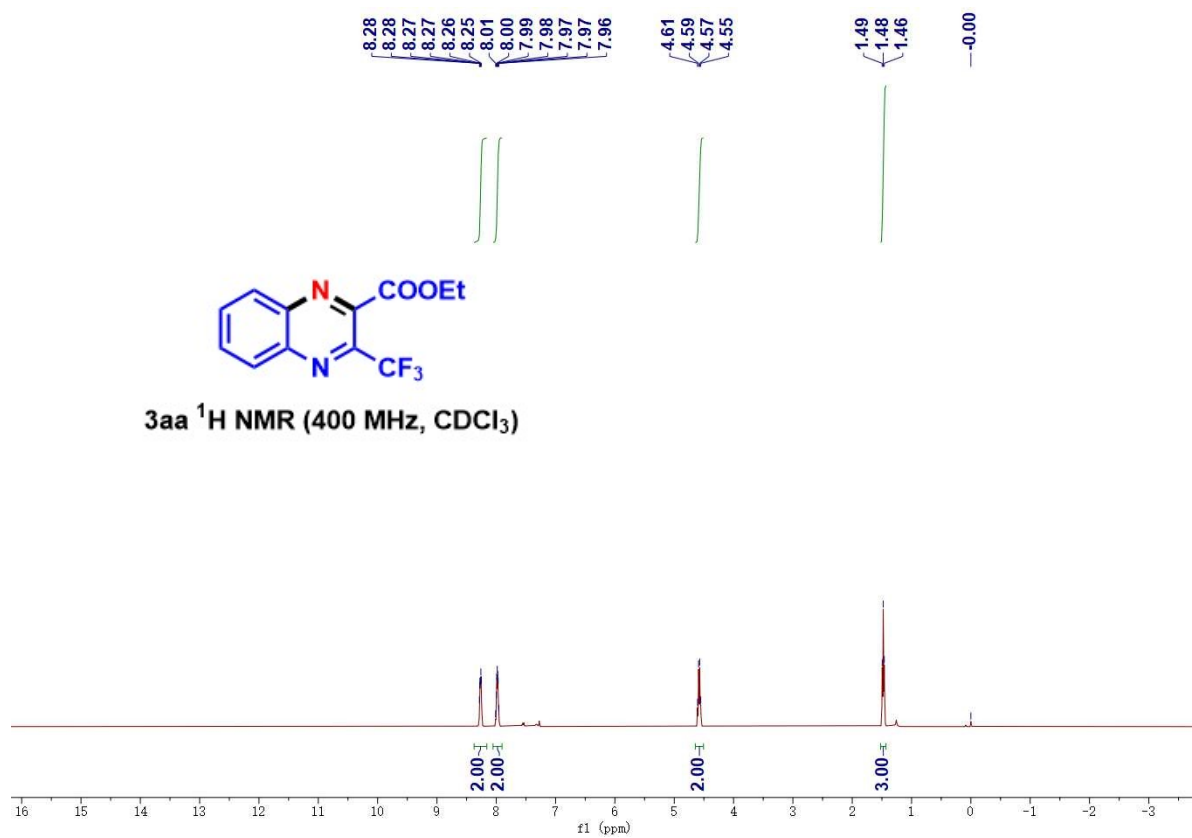

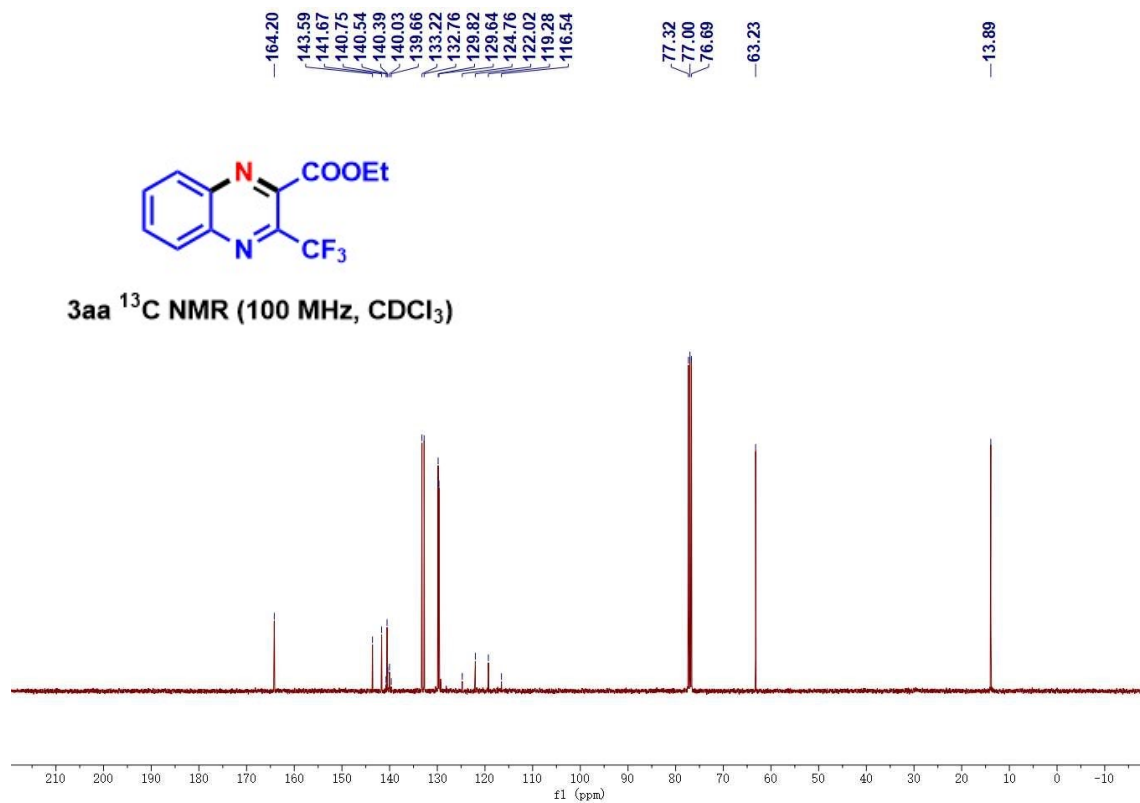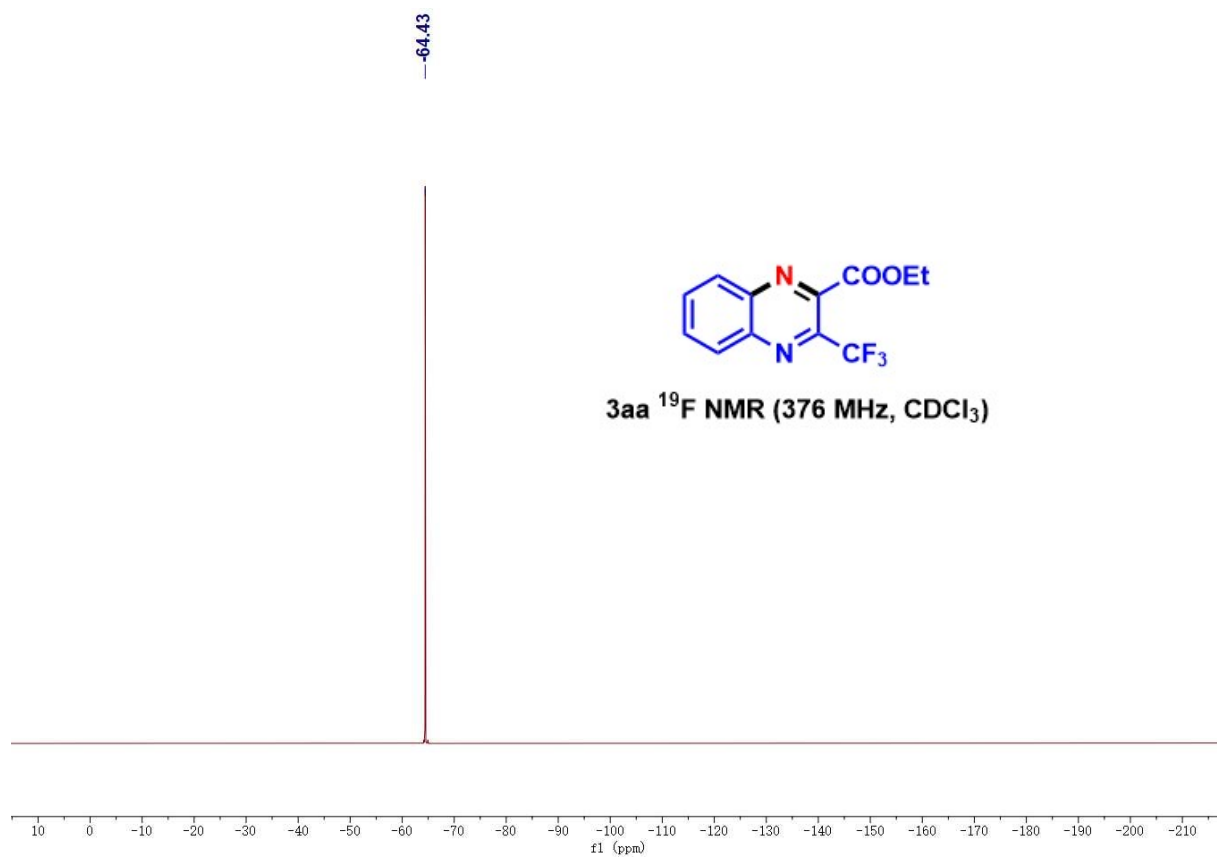



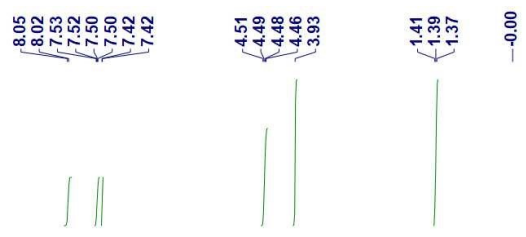

MeO COC1=CC=C2N=C(C(=O)OCC)C(F)(F)F=N2  
 3ab <sup>1</sup>H NMR (400 MHz, CDCl<sub>3</sub>)

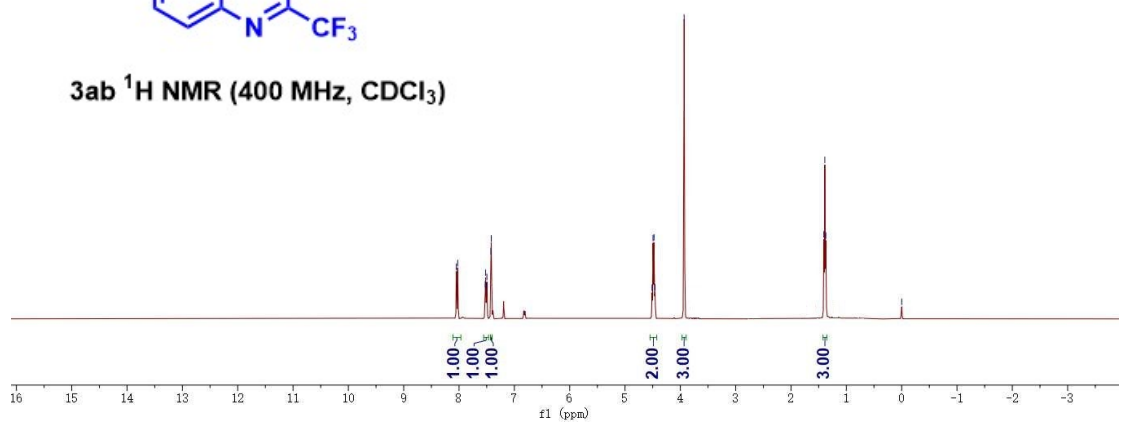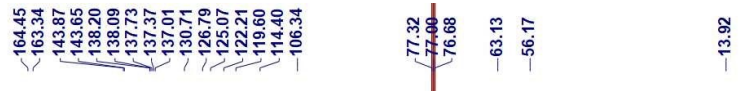

MeO COC1=CC=C2N=C(C(=O)OCC)C(F)(F)F=N2  
 3ab <sup>13</sup>C NMR (100 MHz, CDCl<sub>3</sub>)

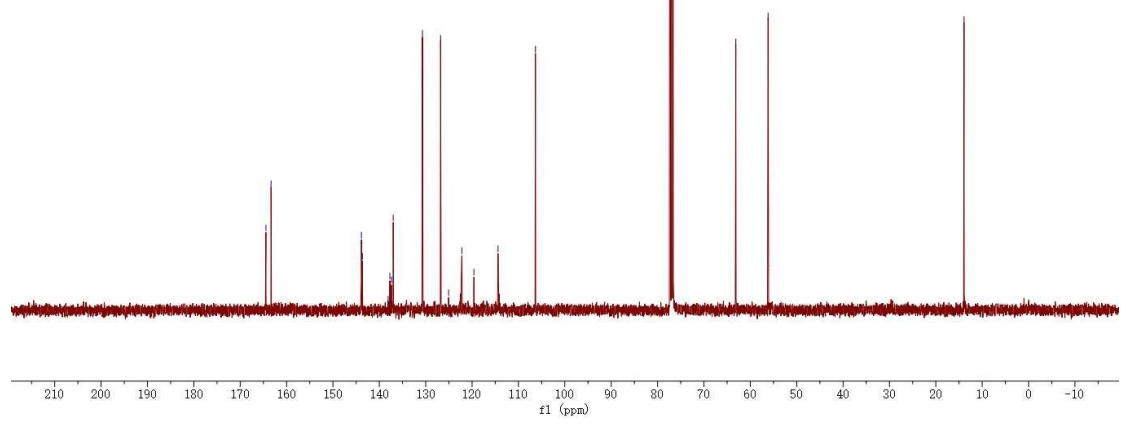

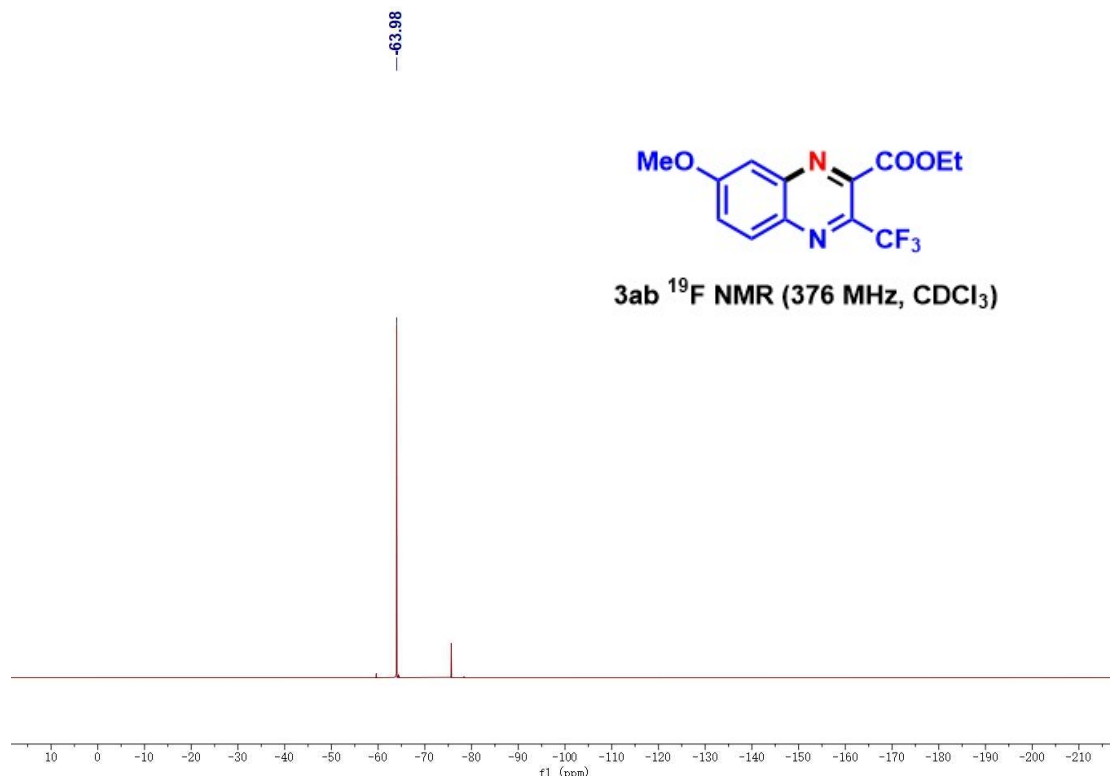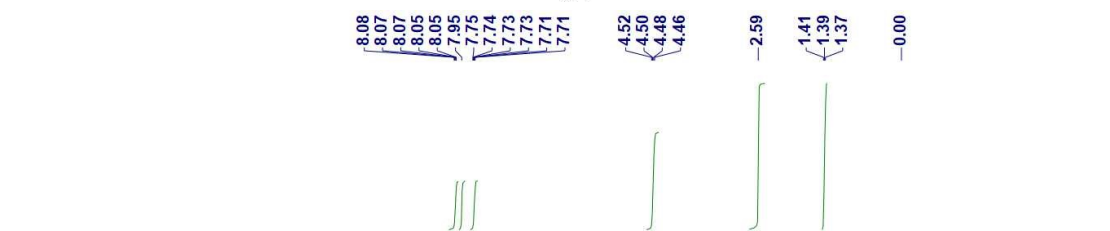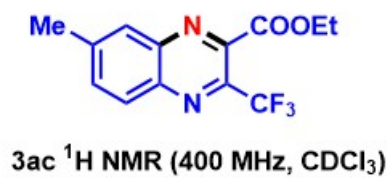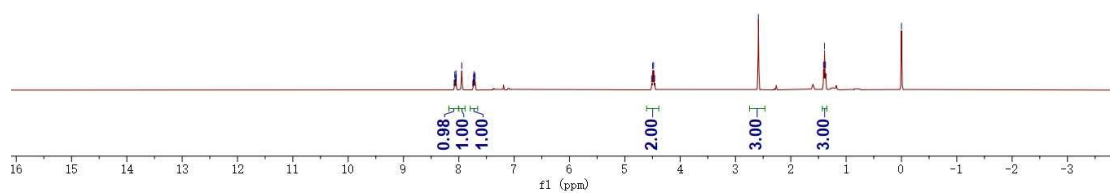

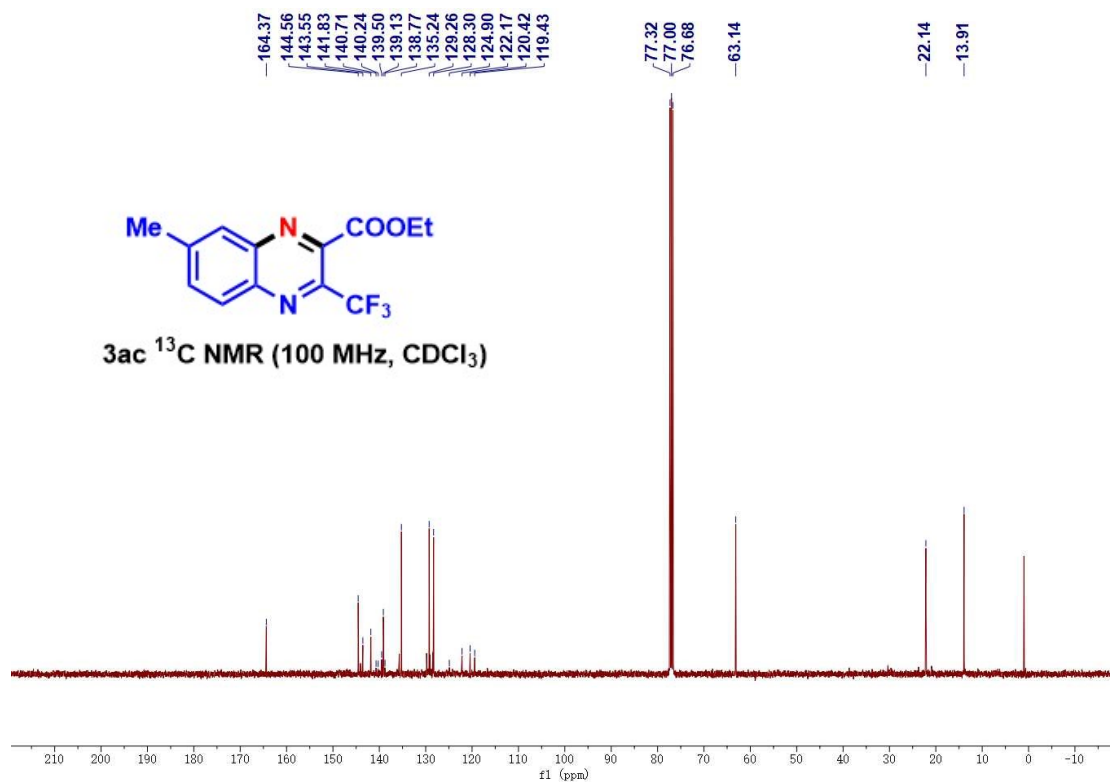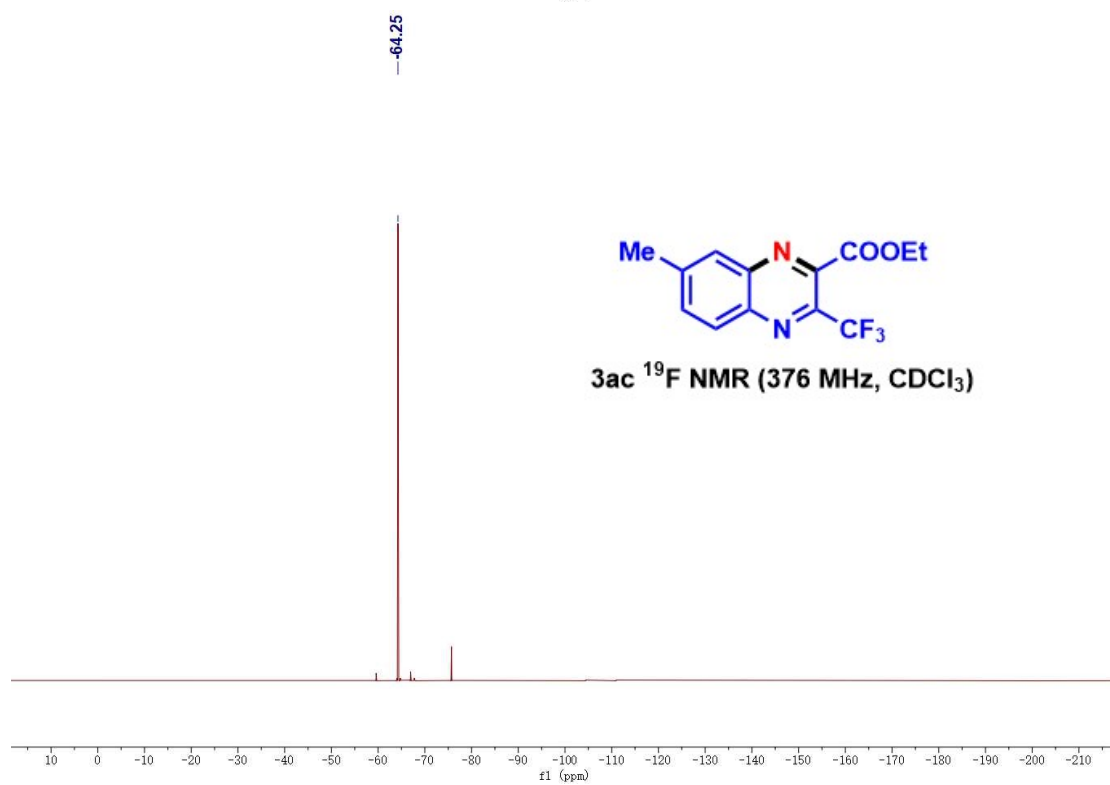

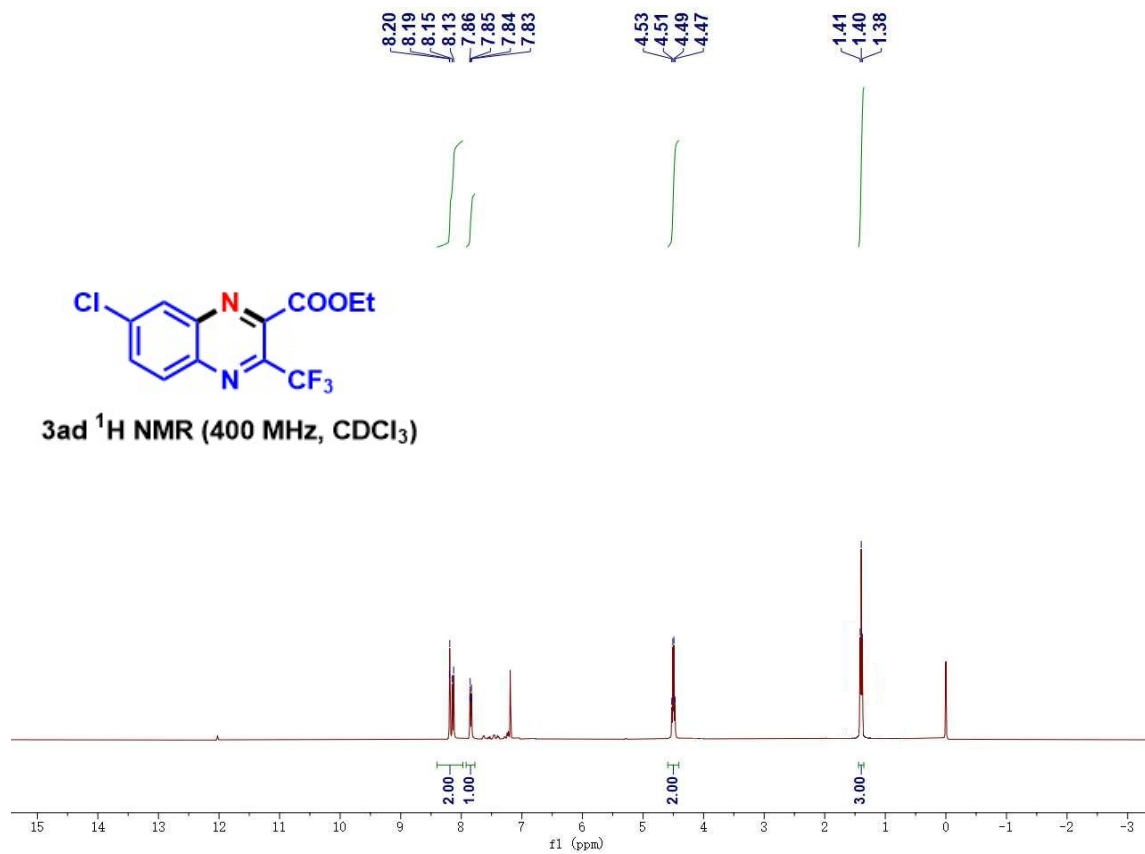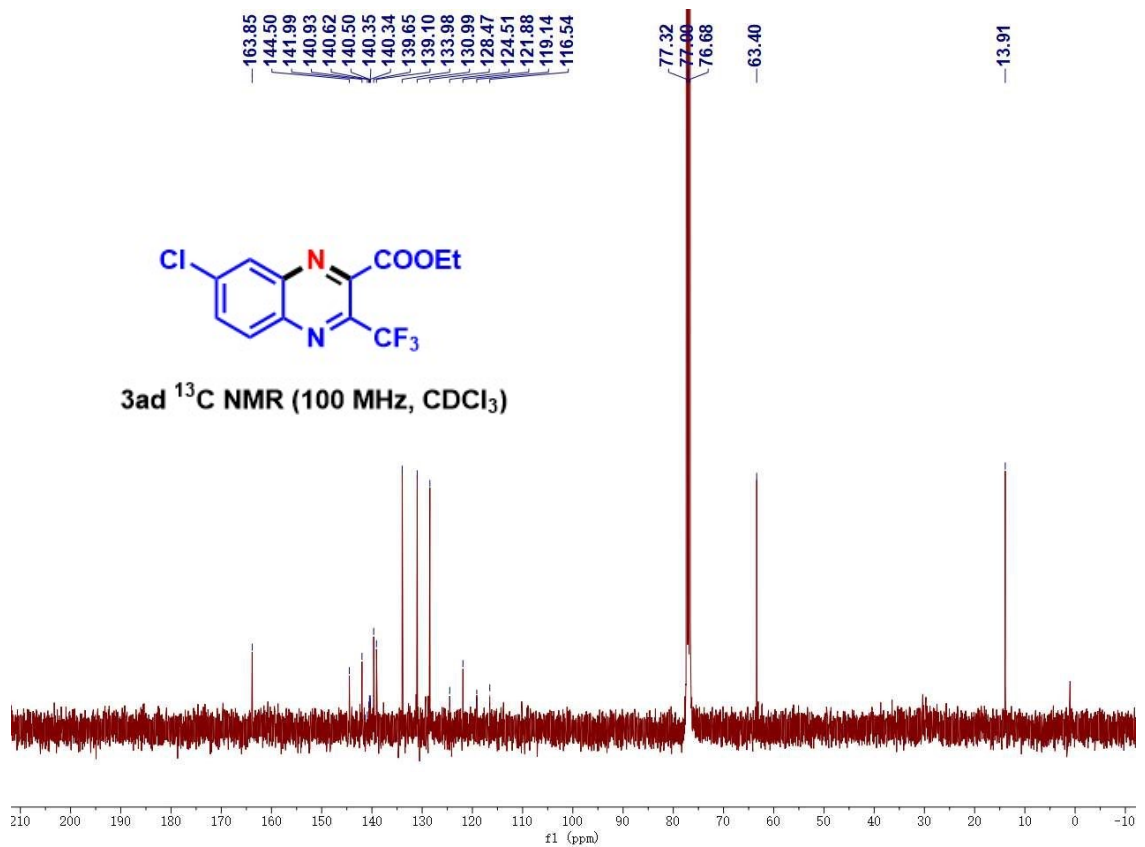

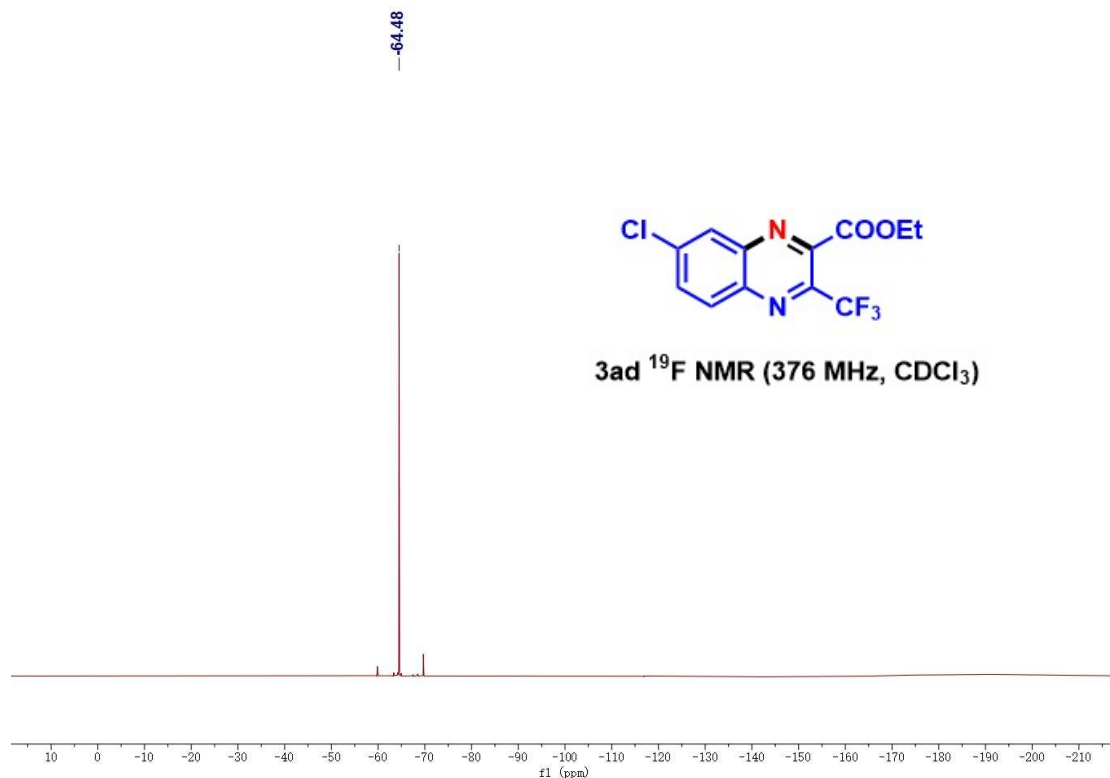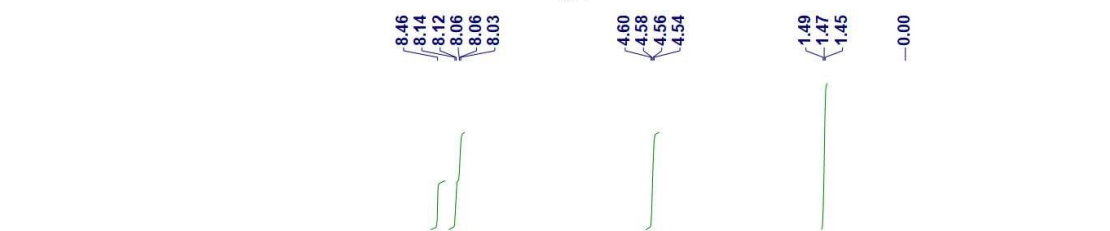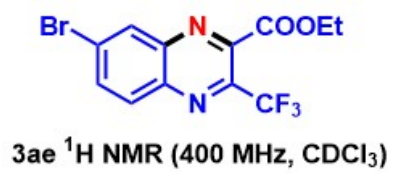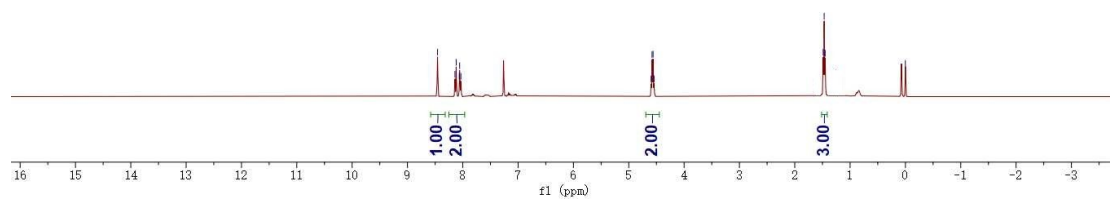

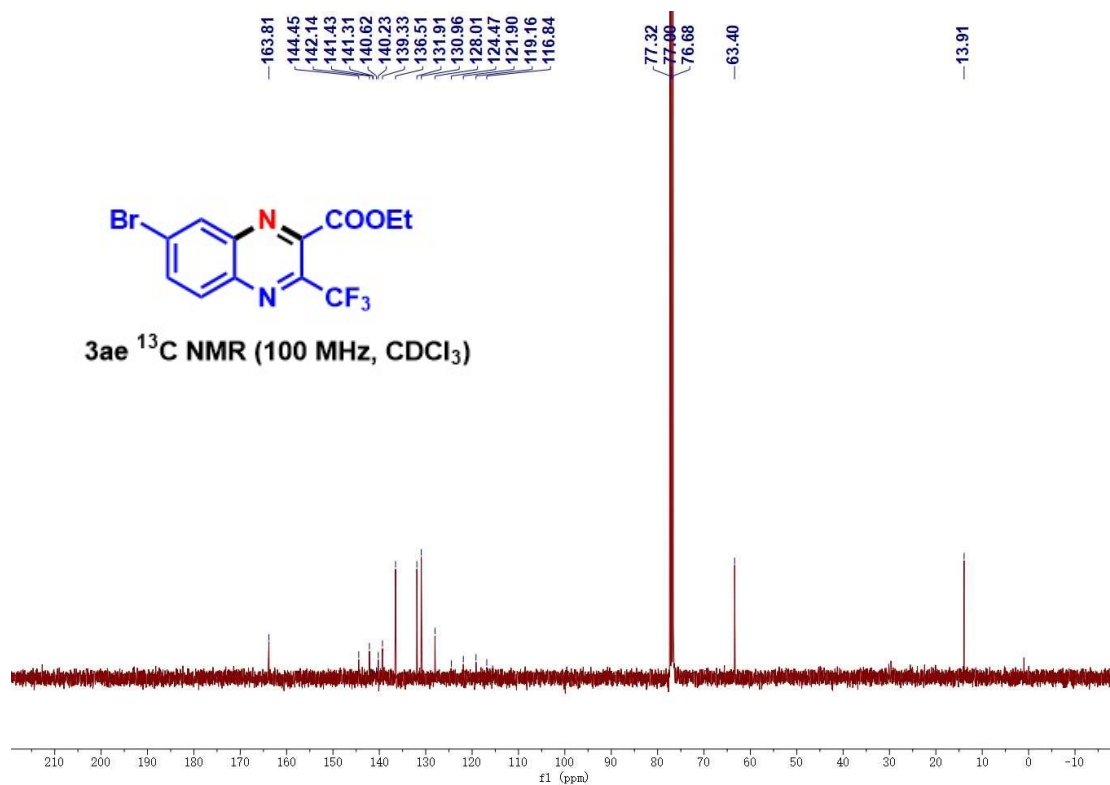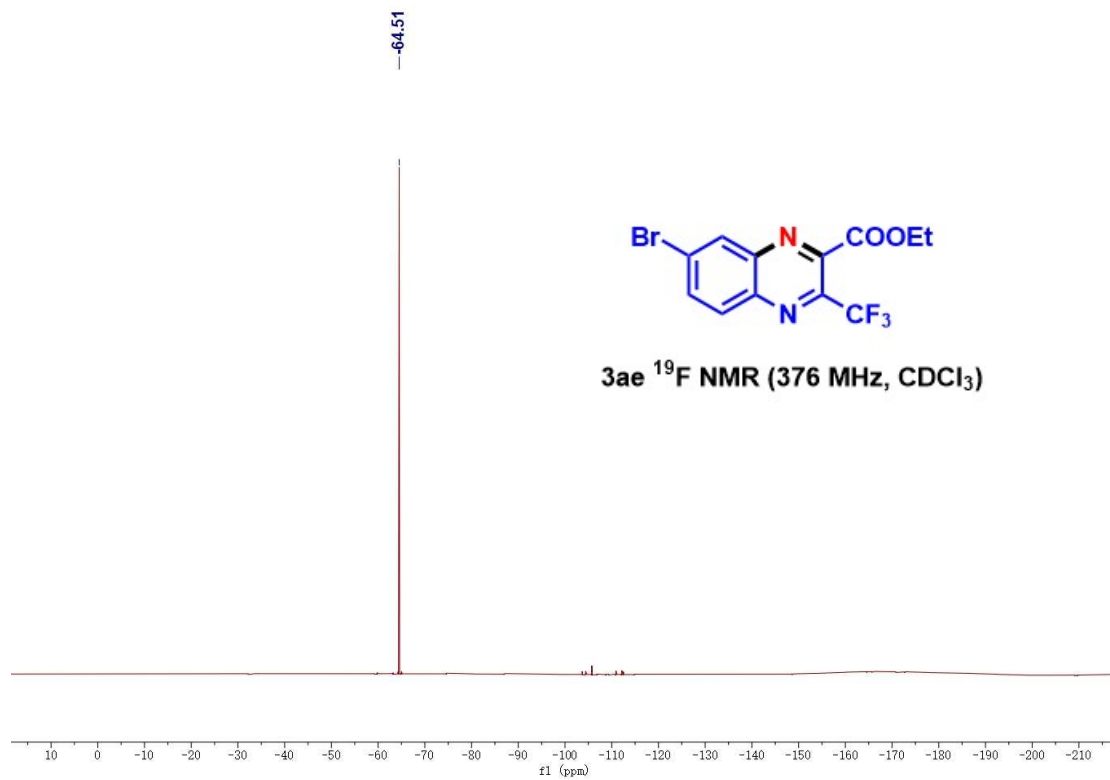

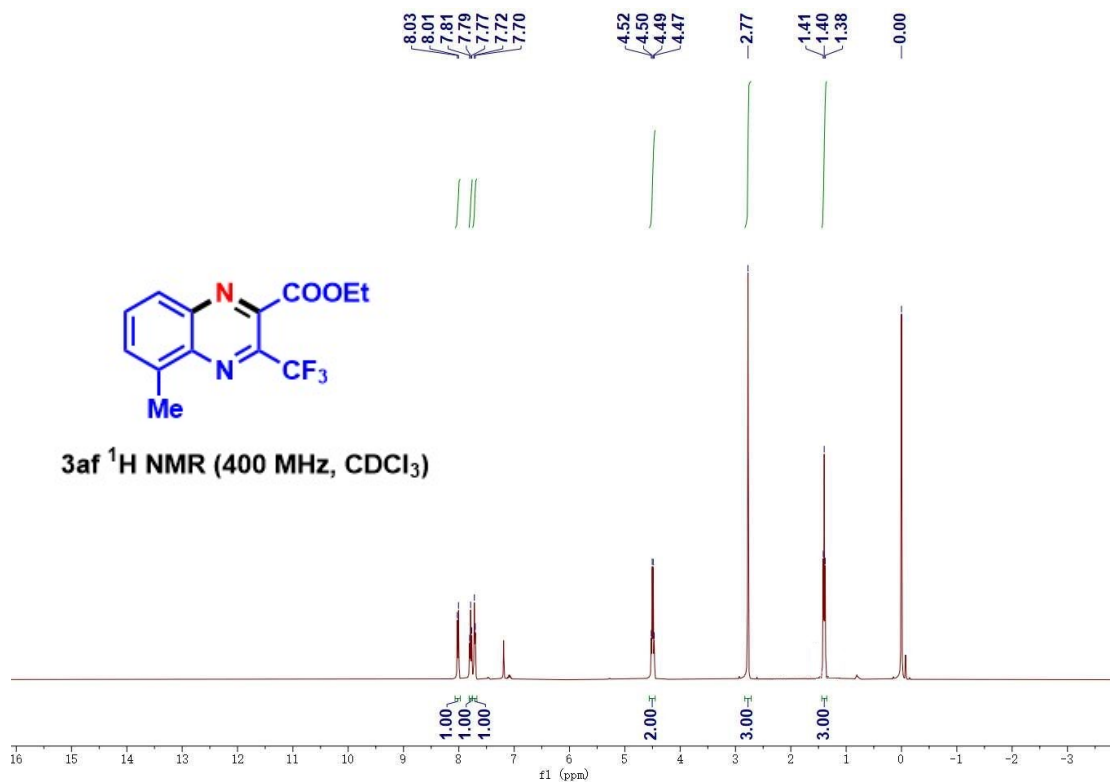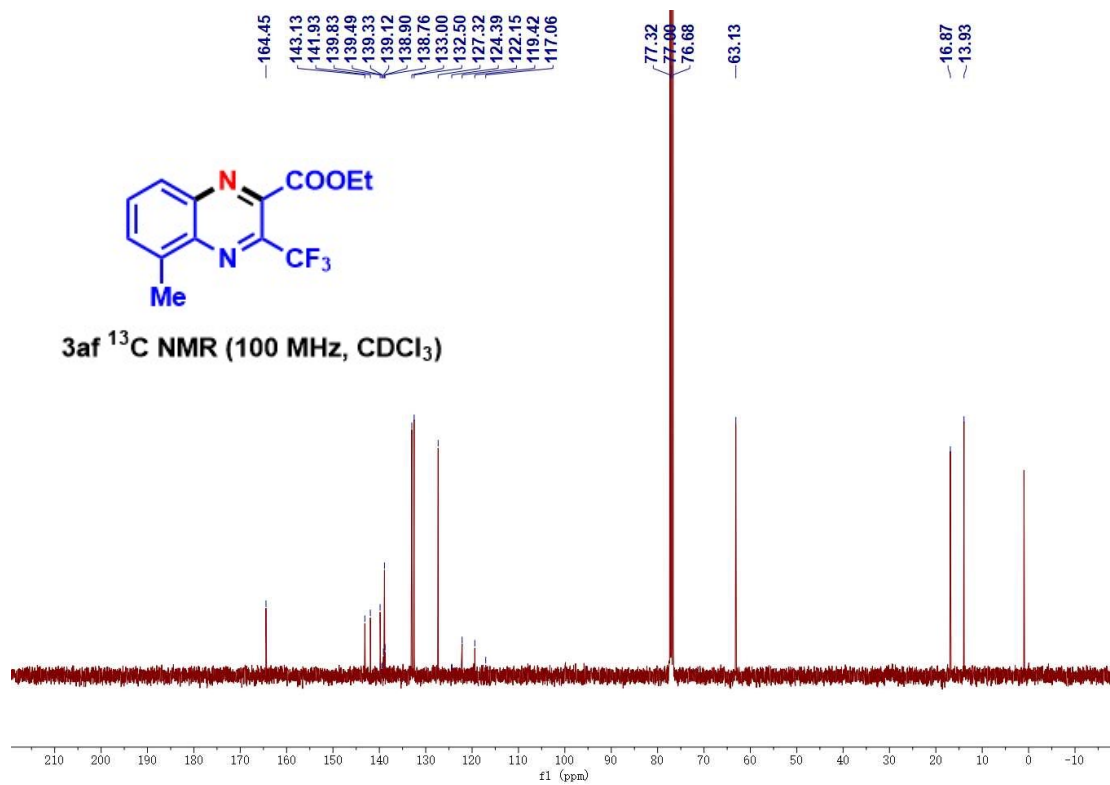

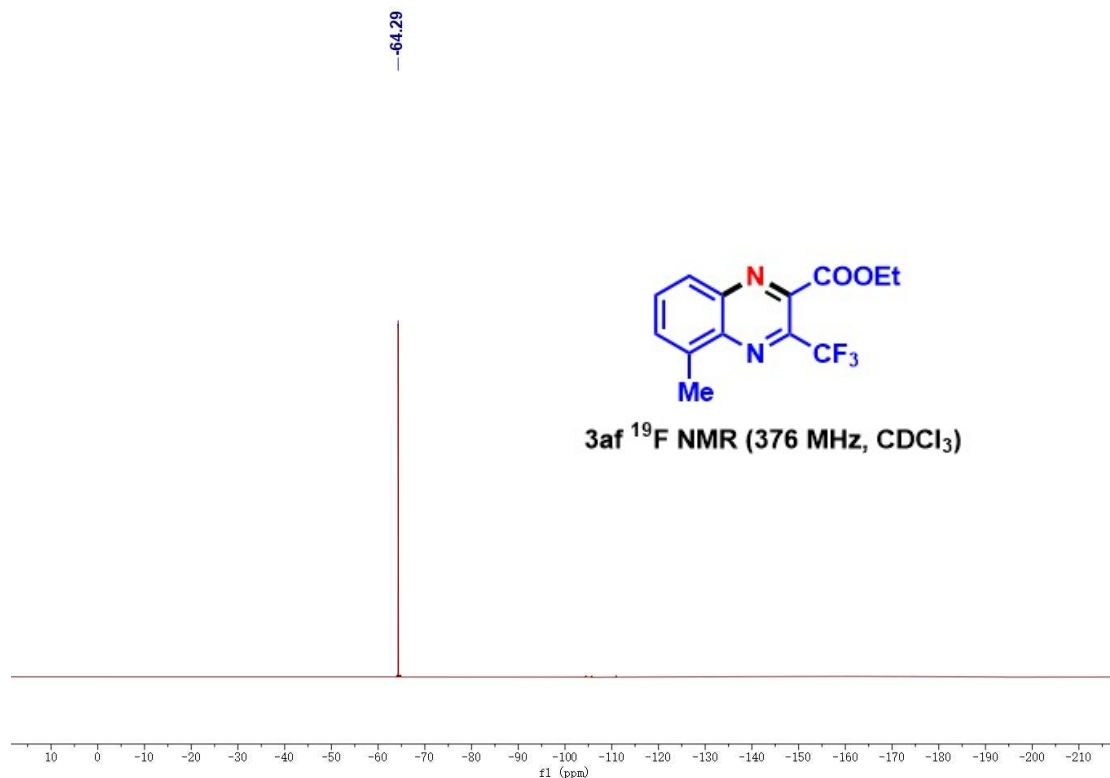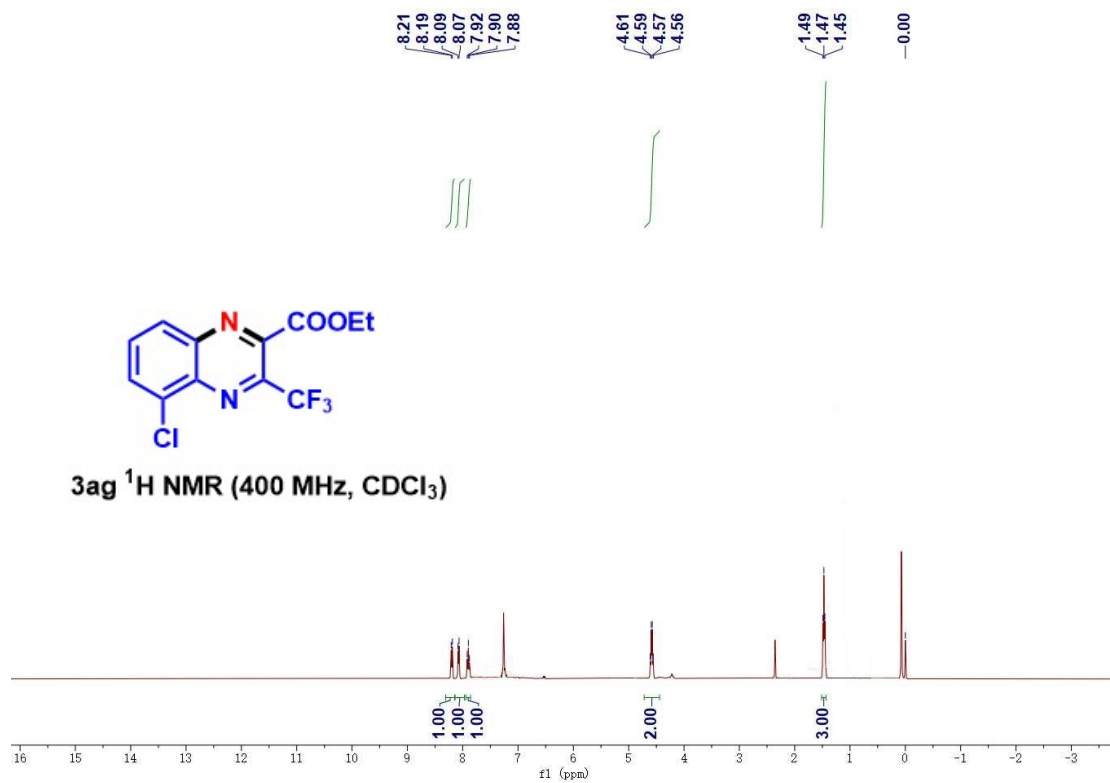



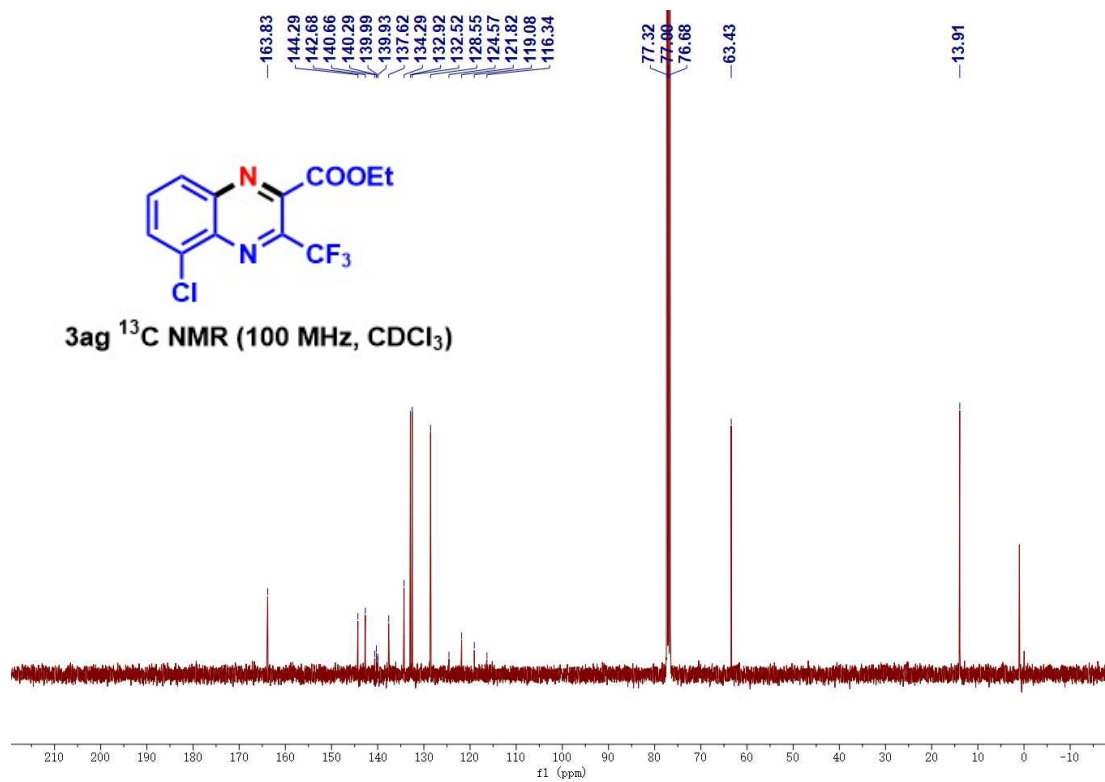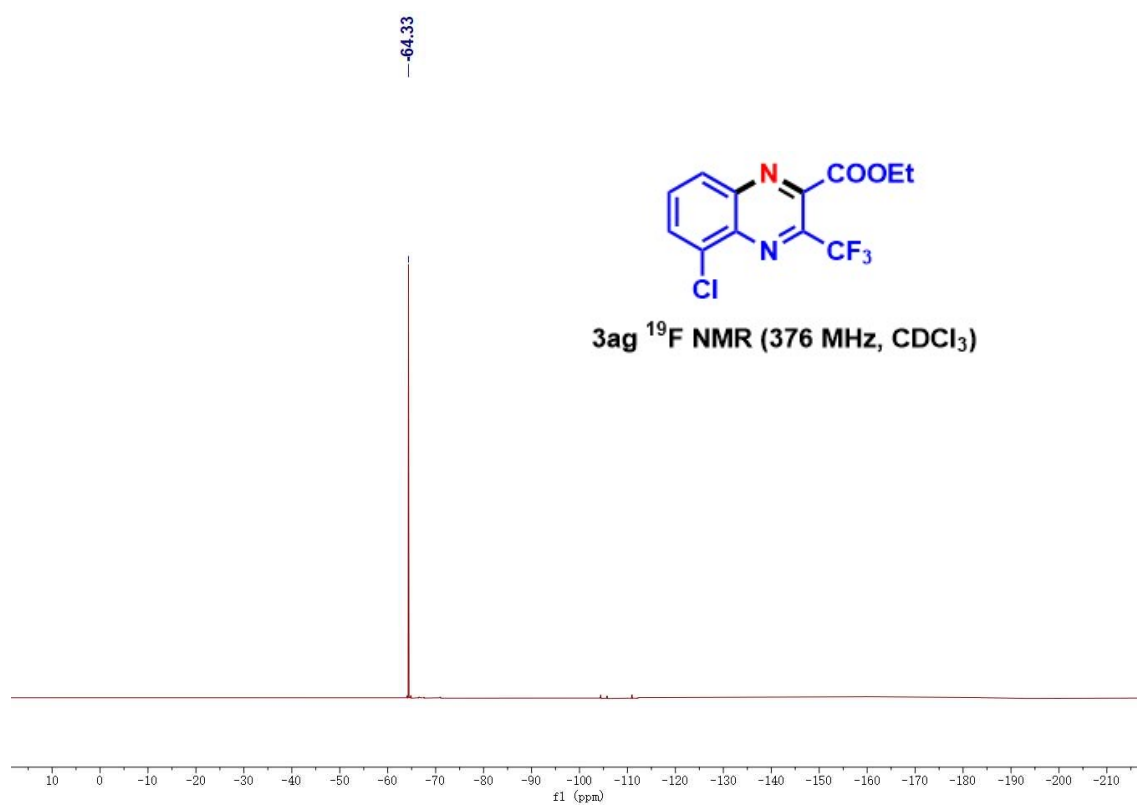

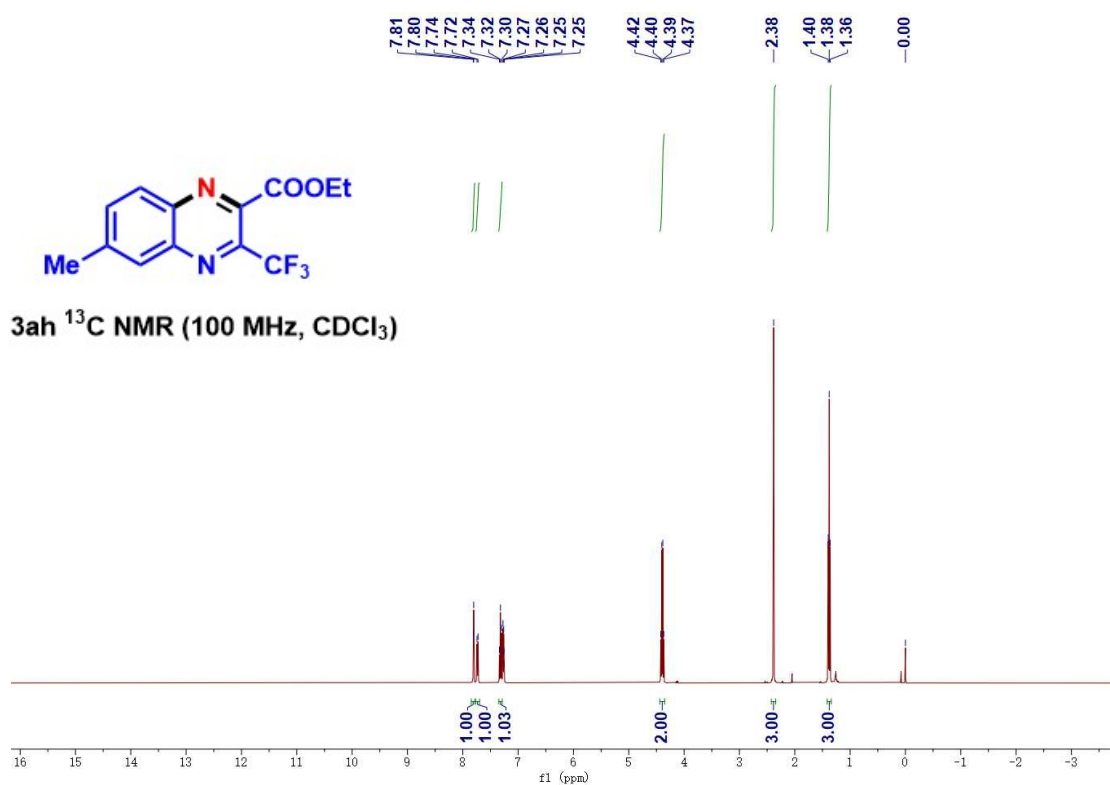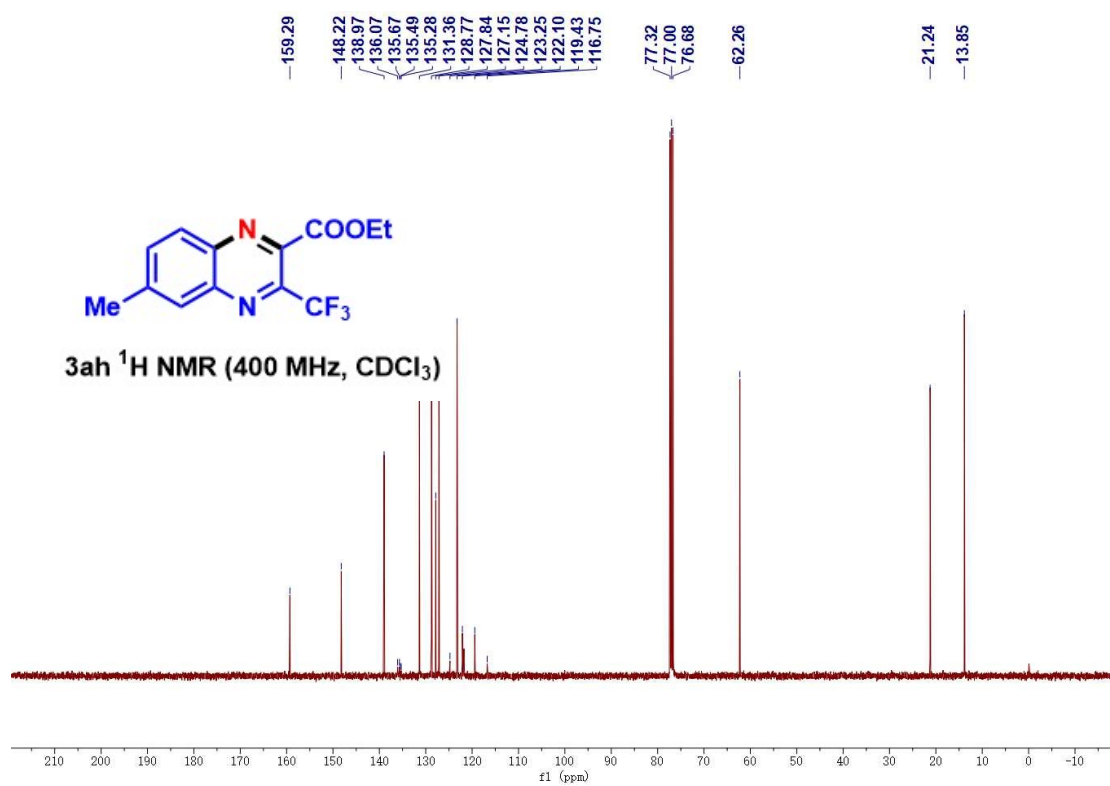

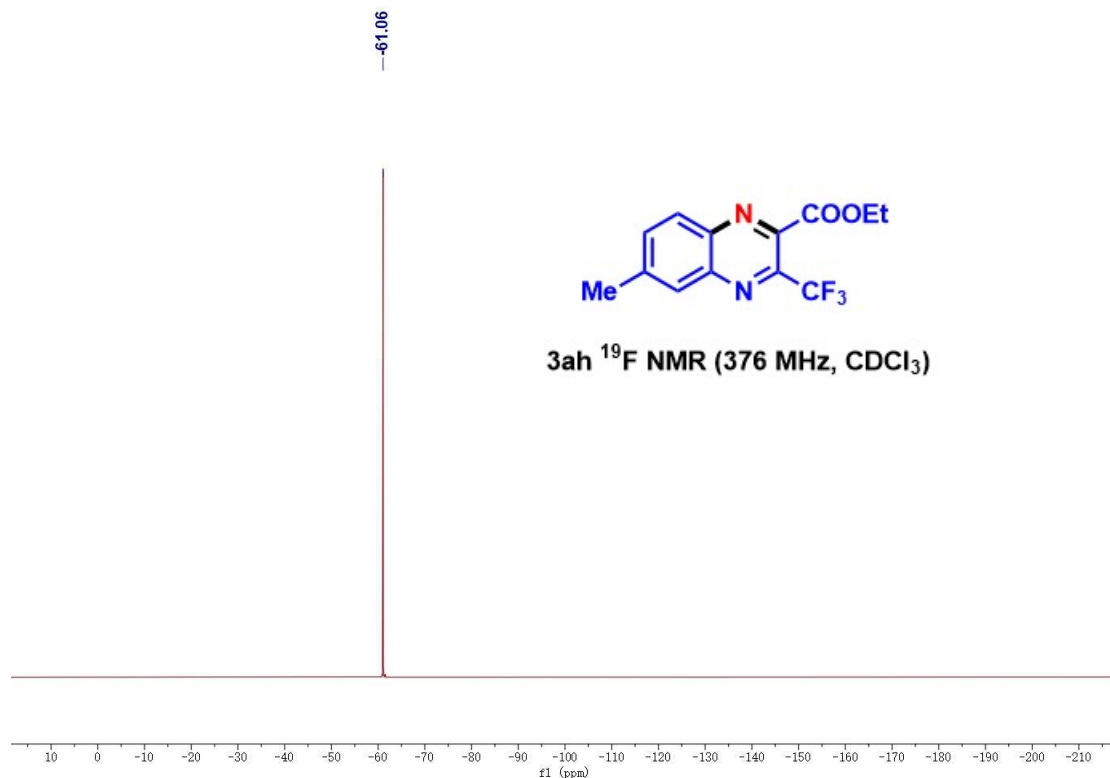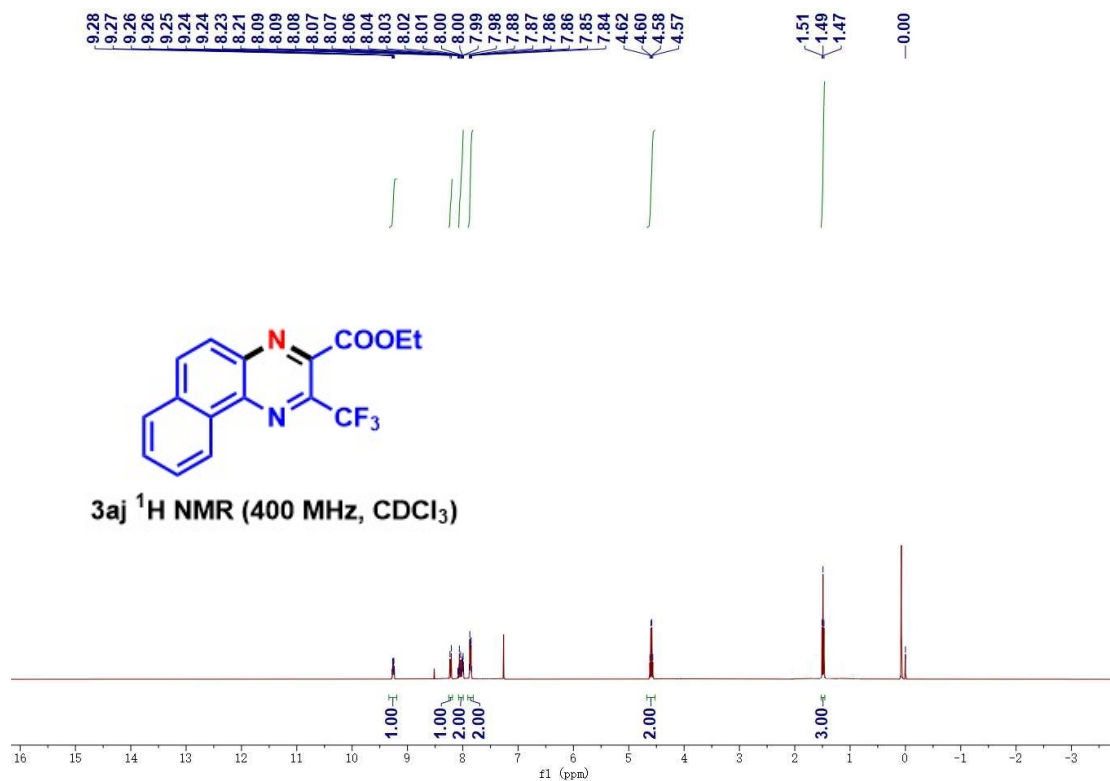

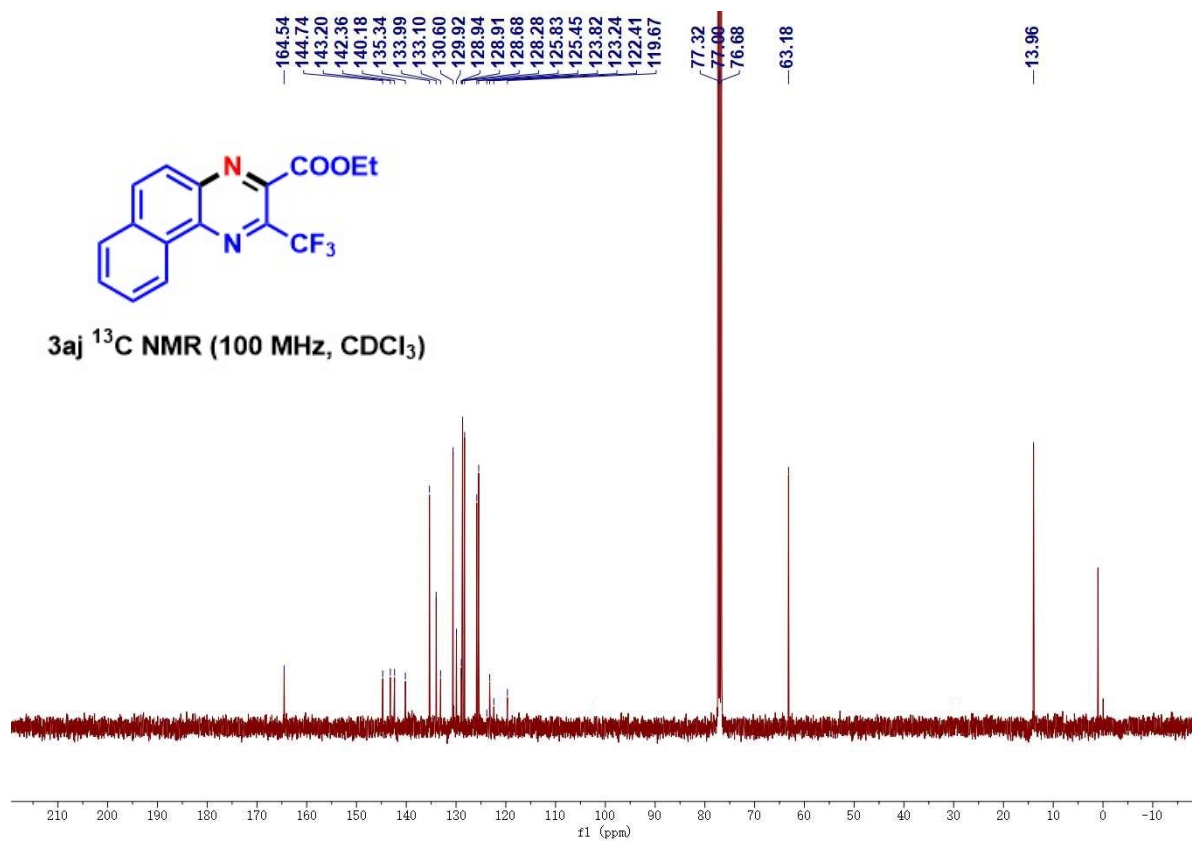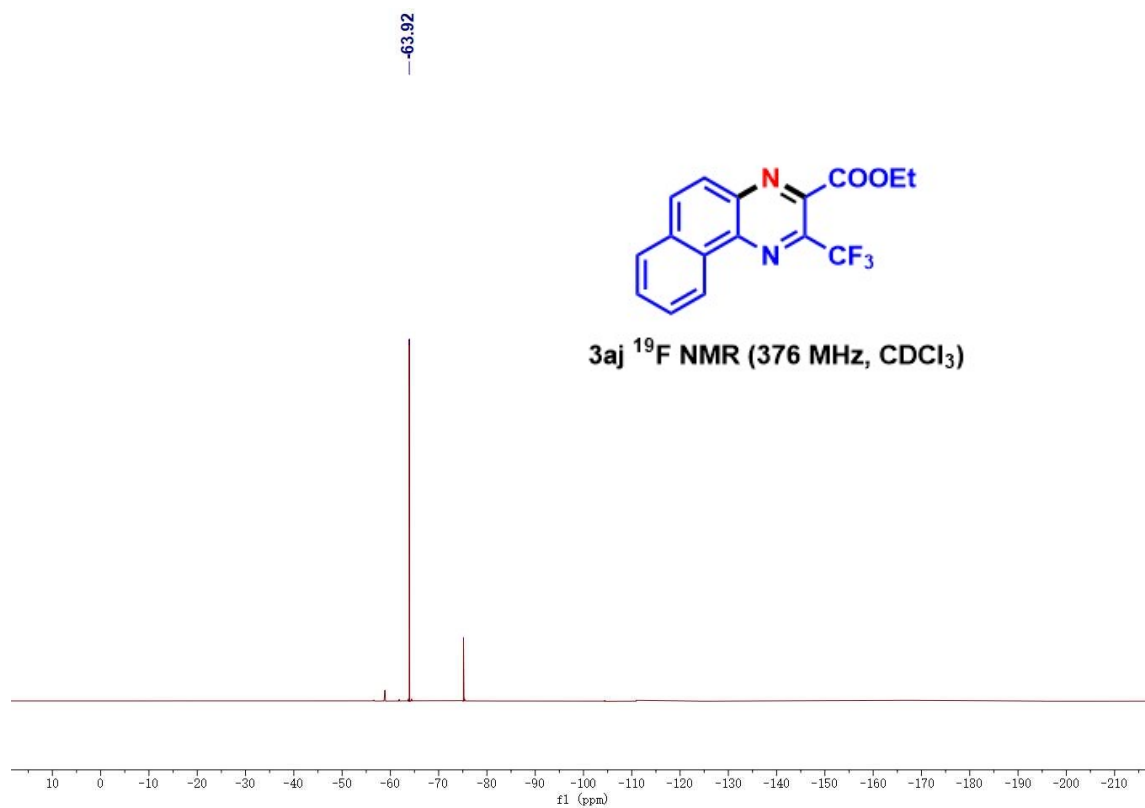

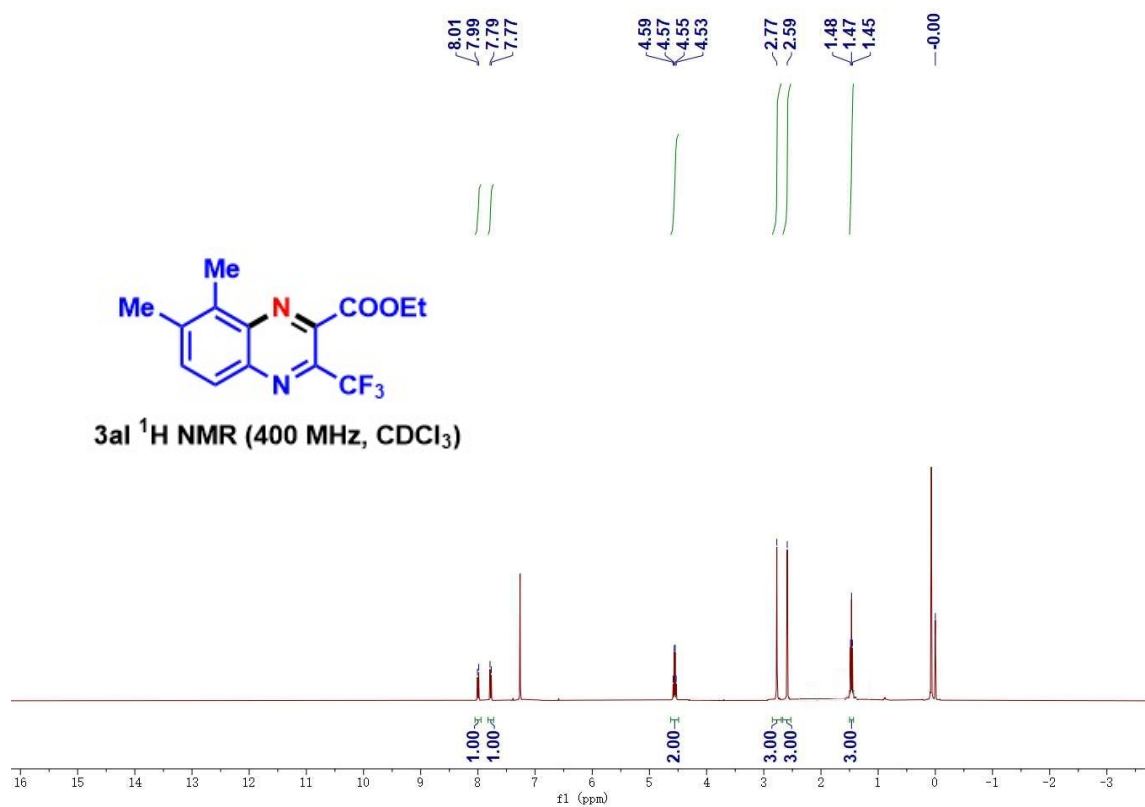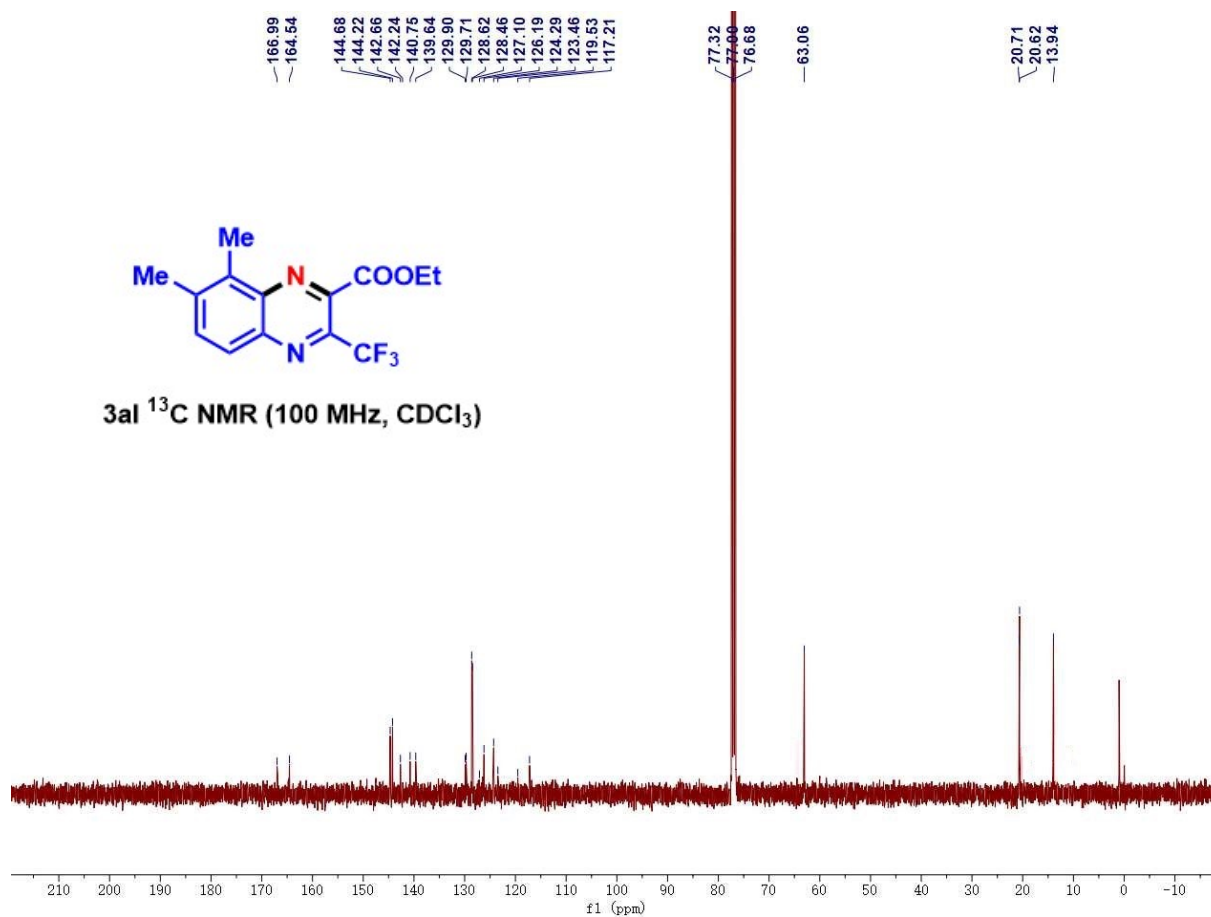

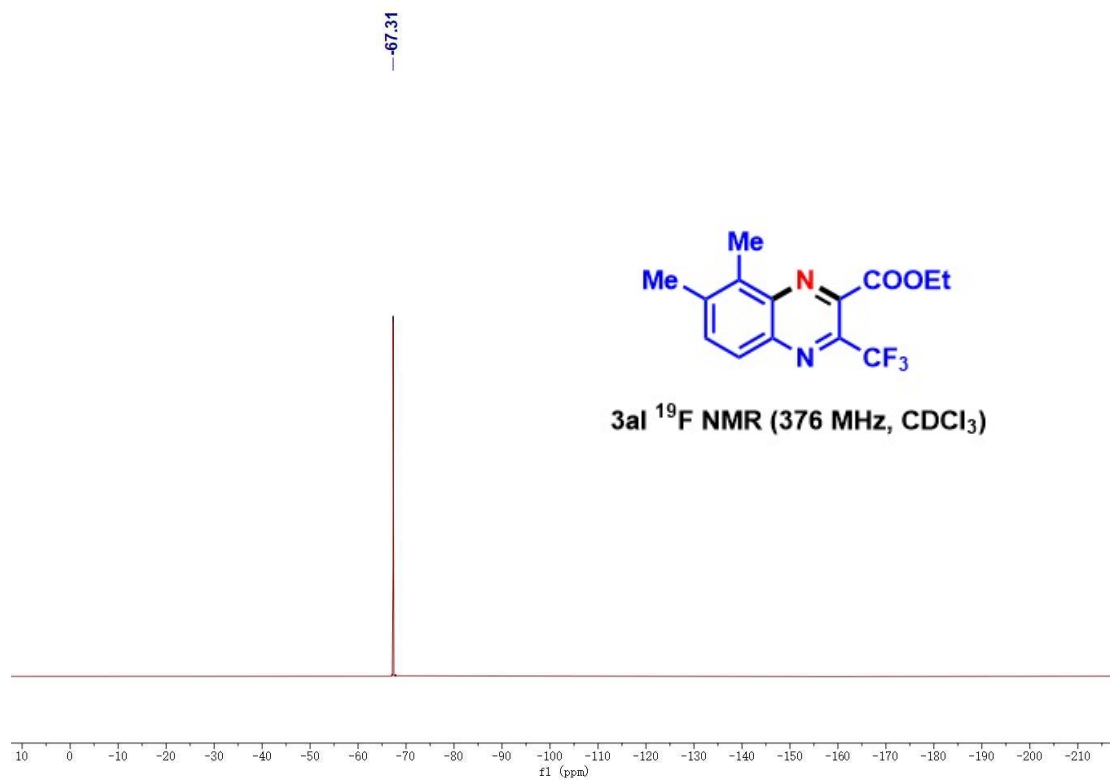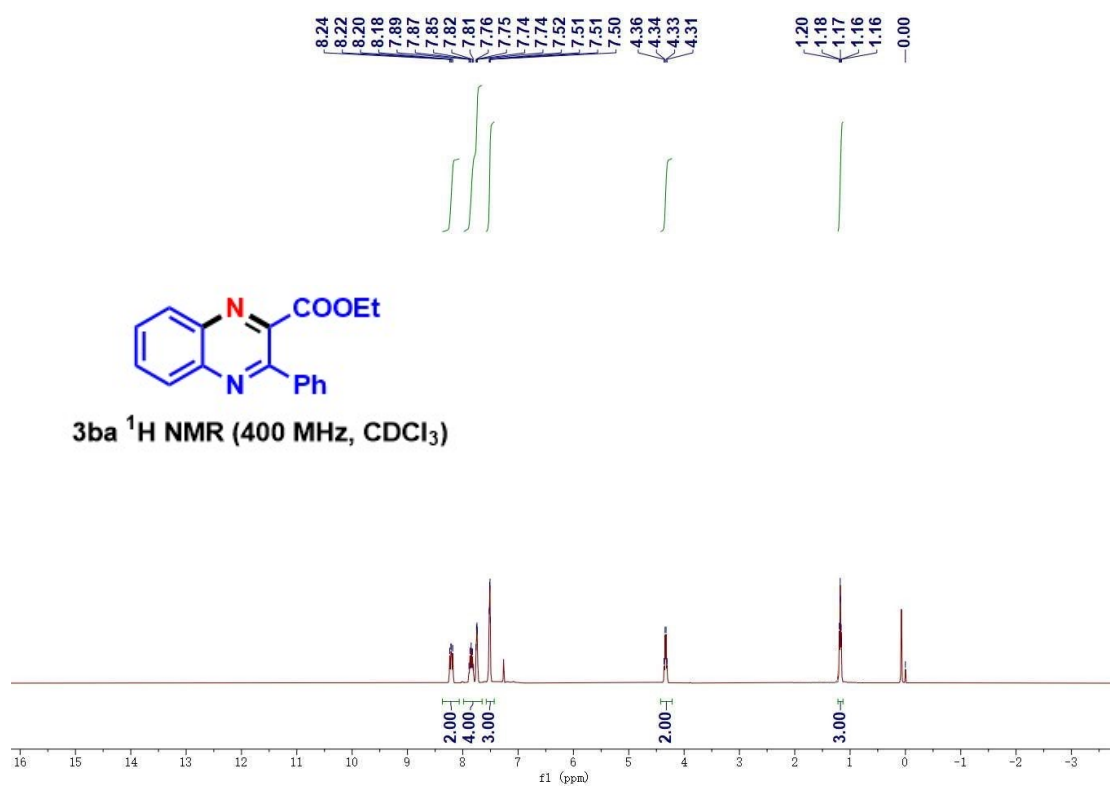

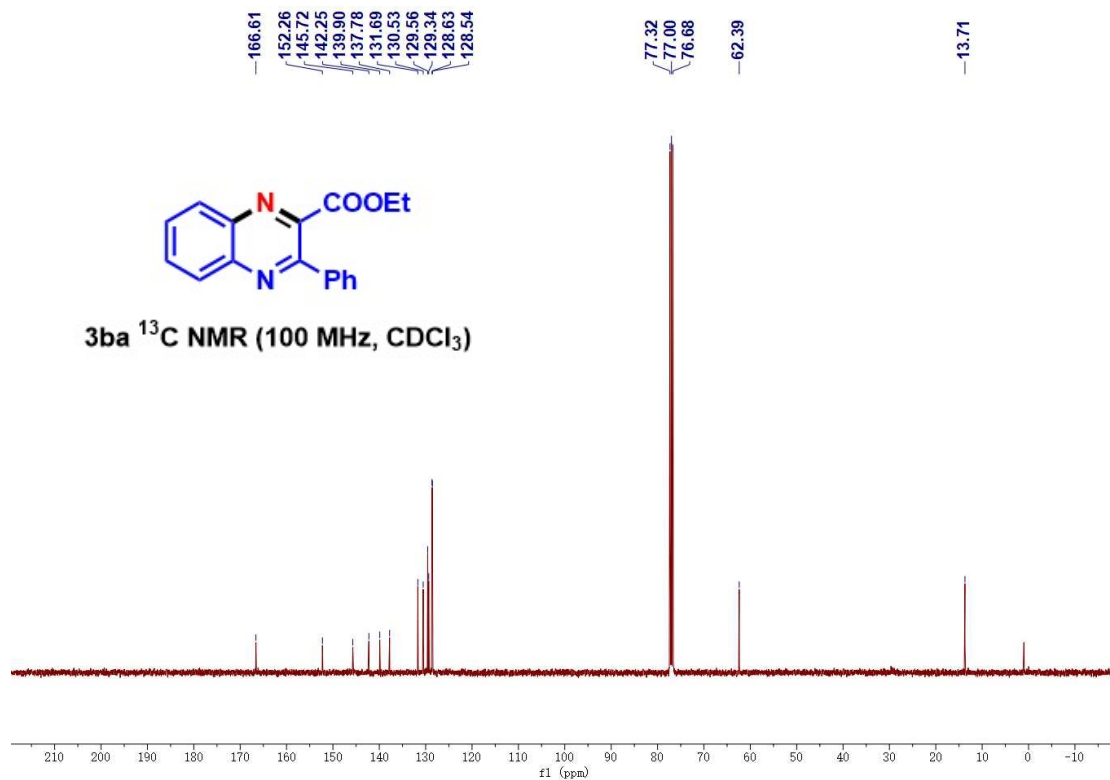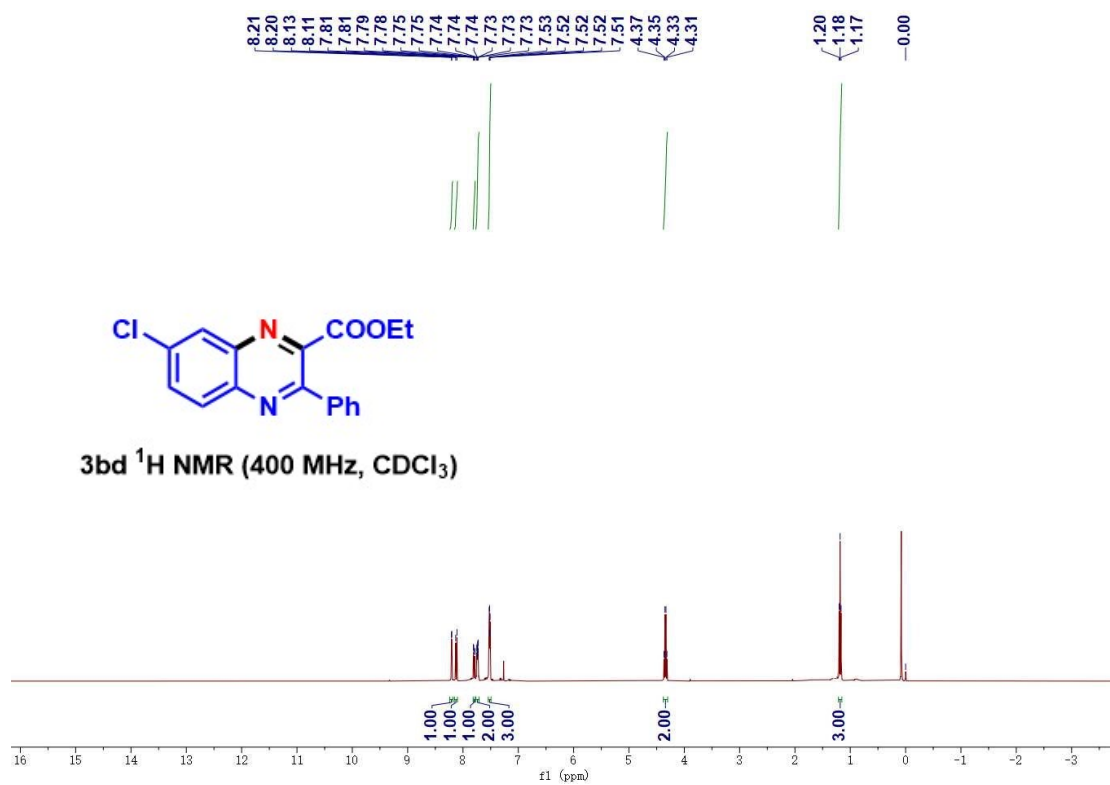

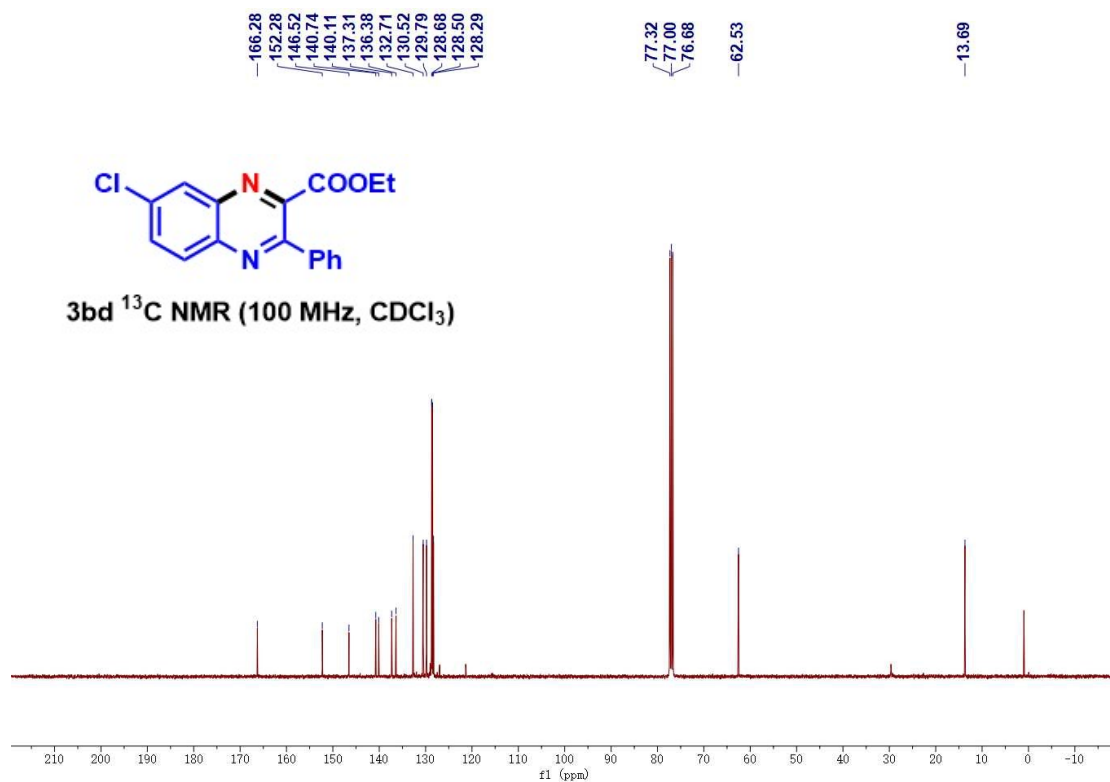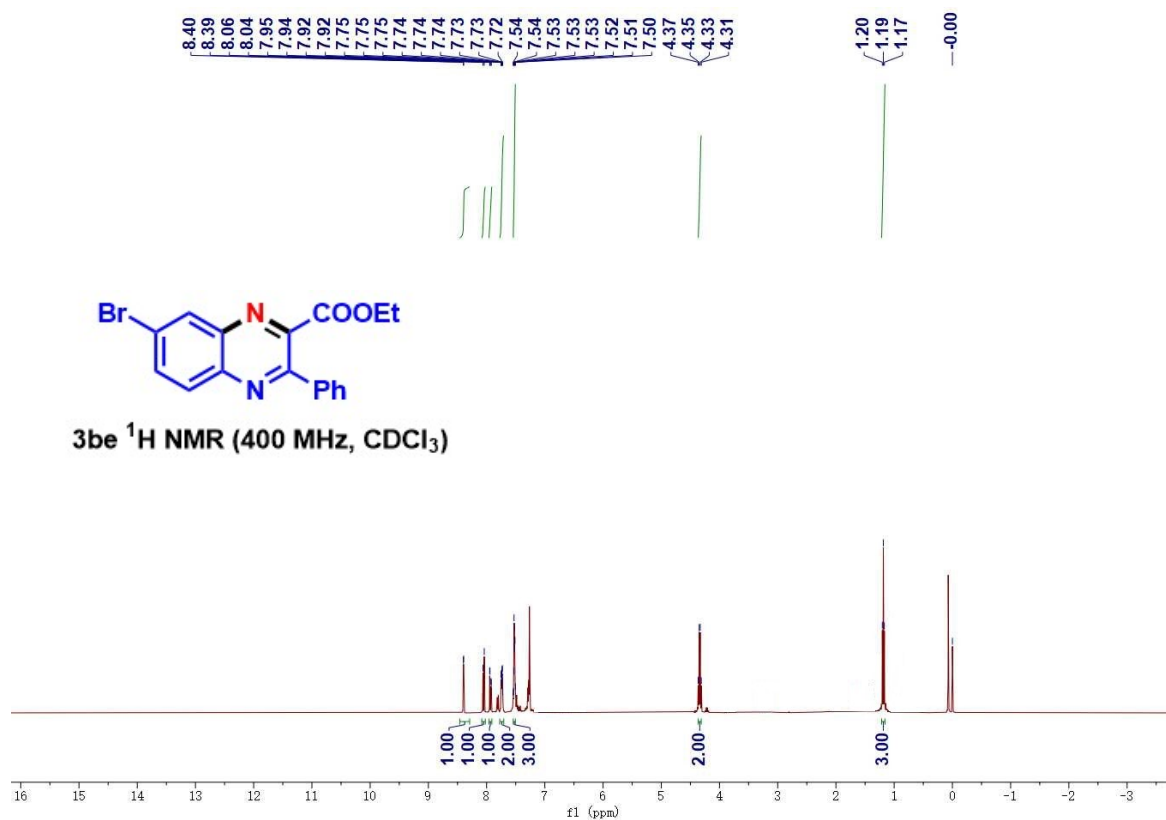



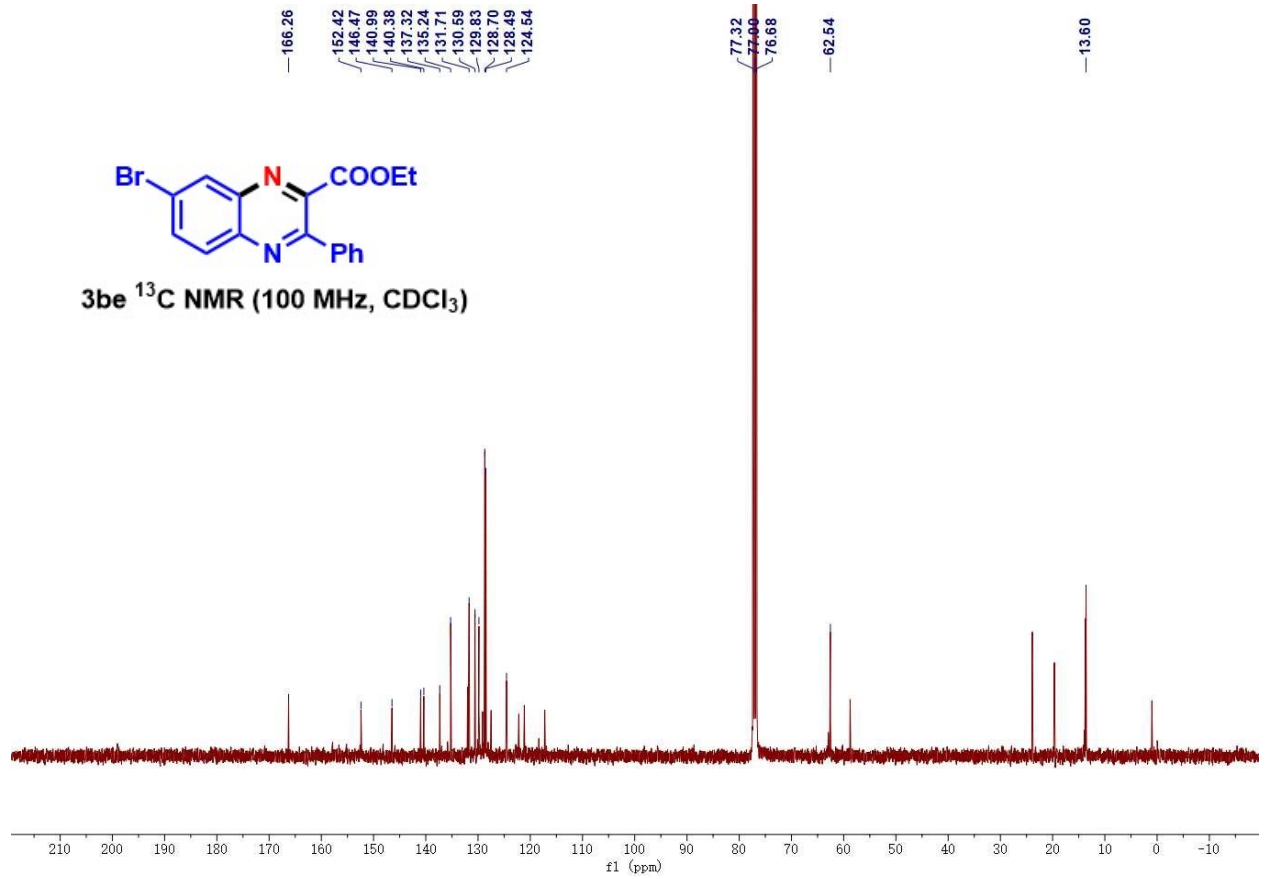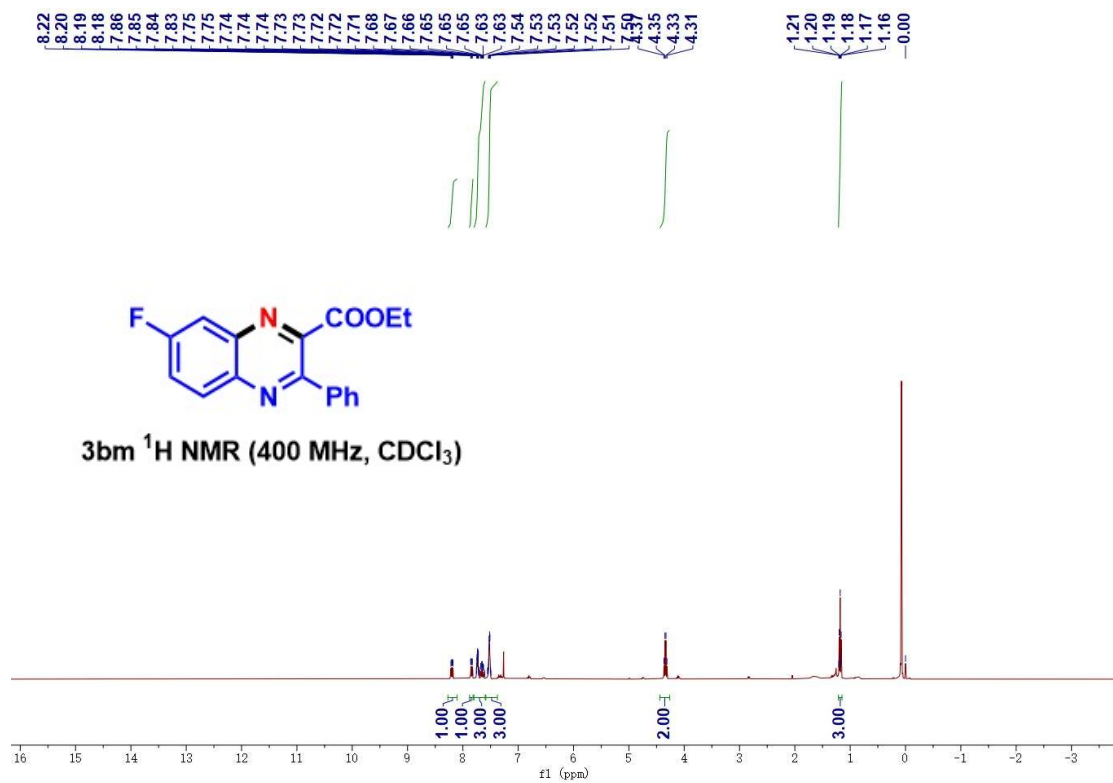

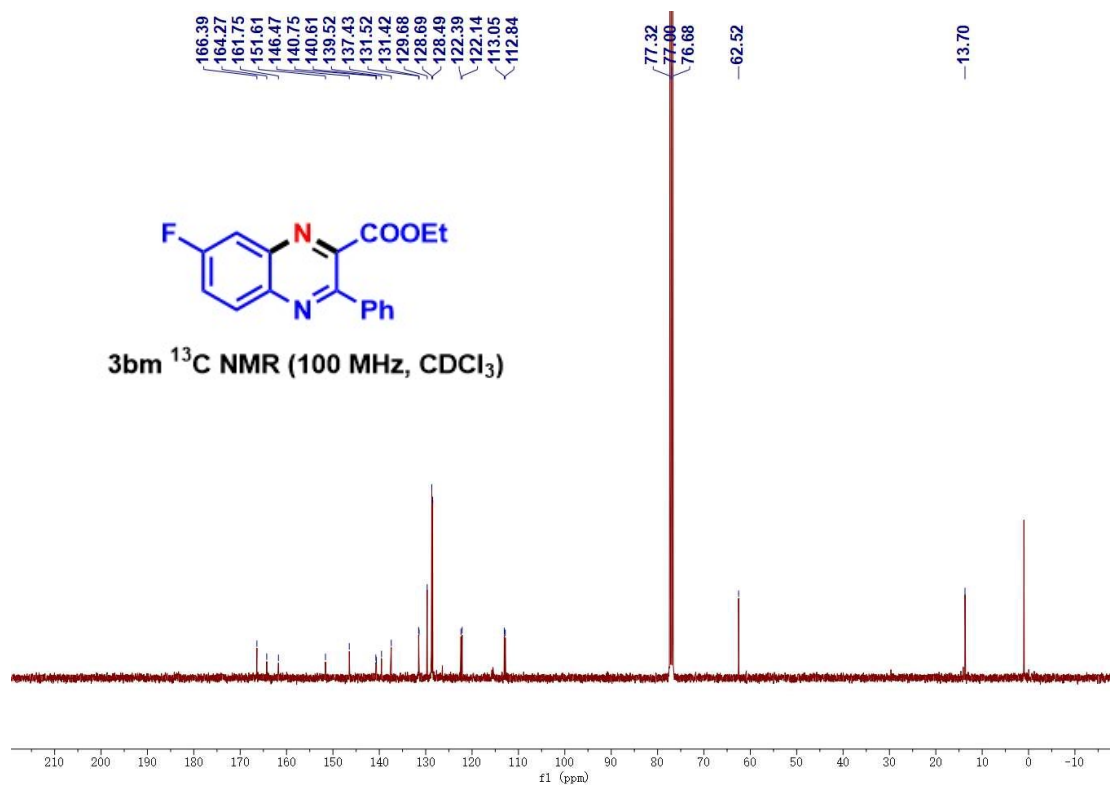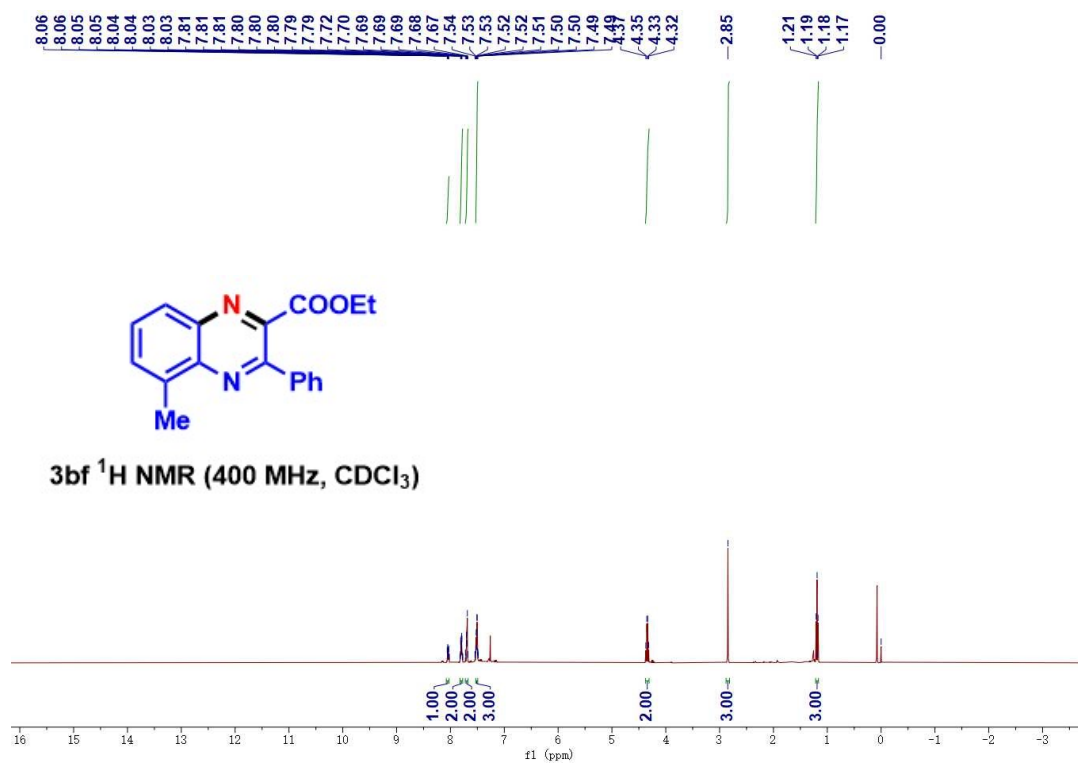

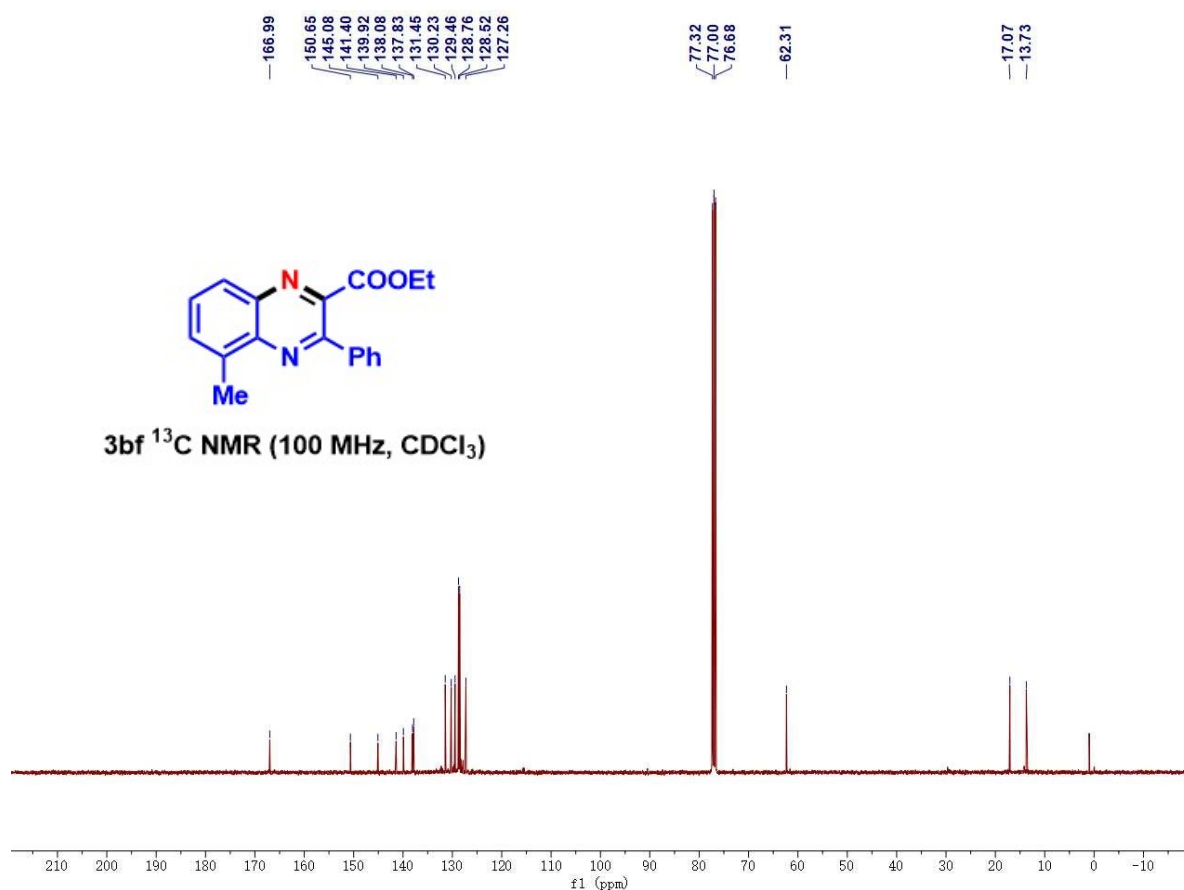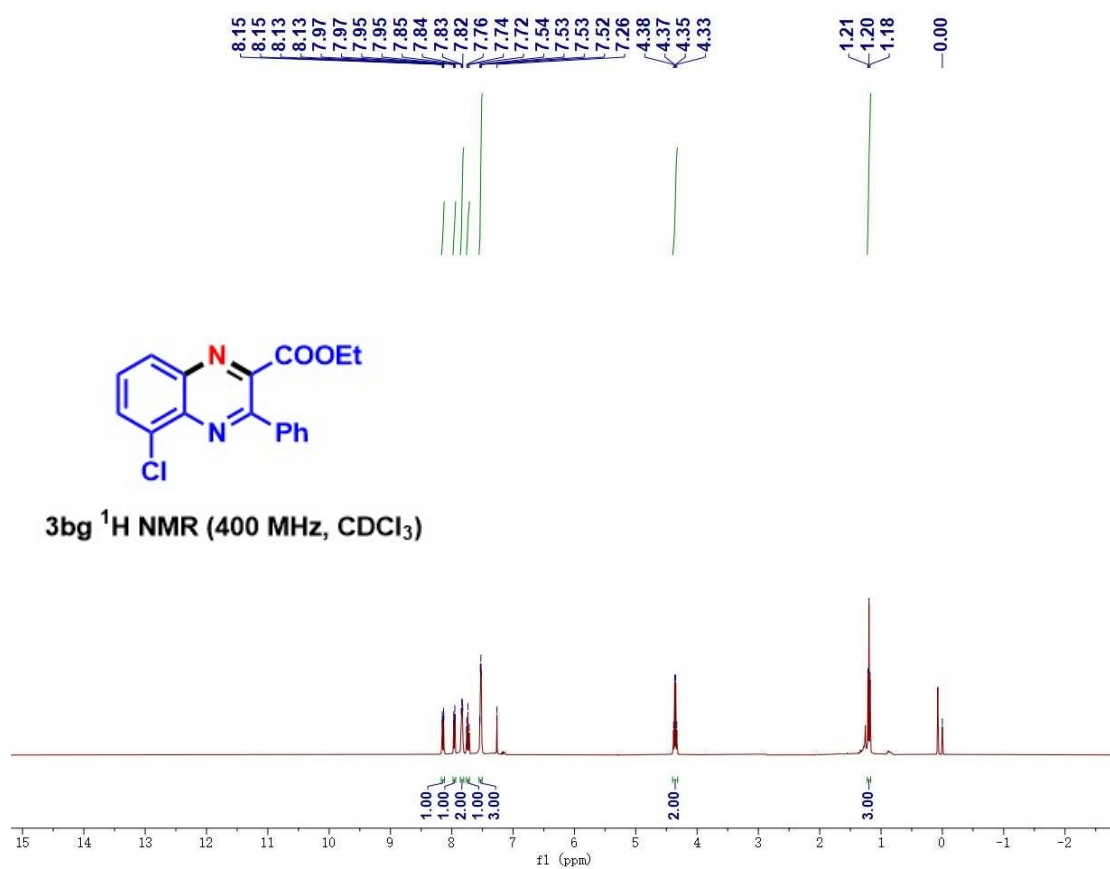

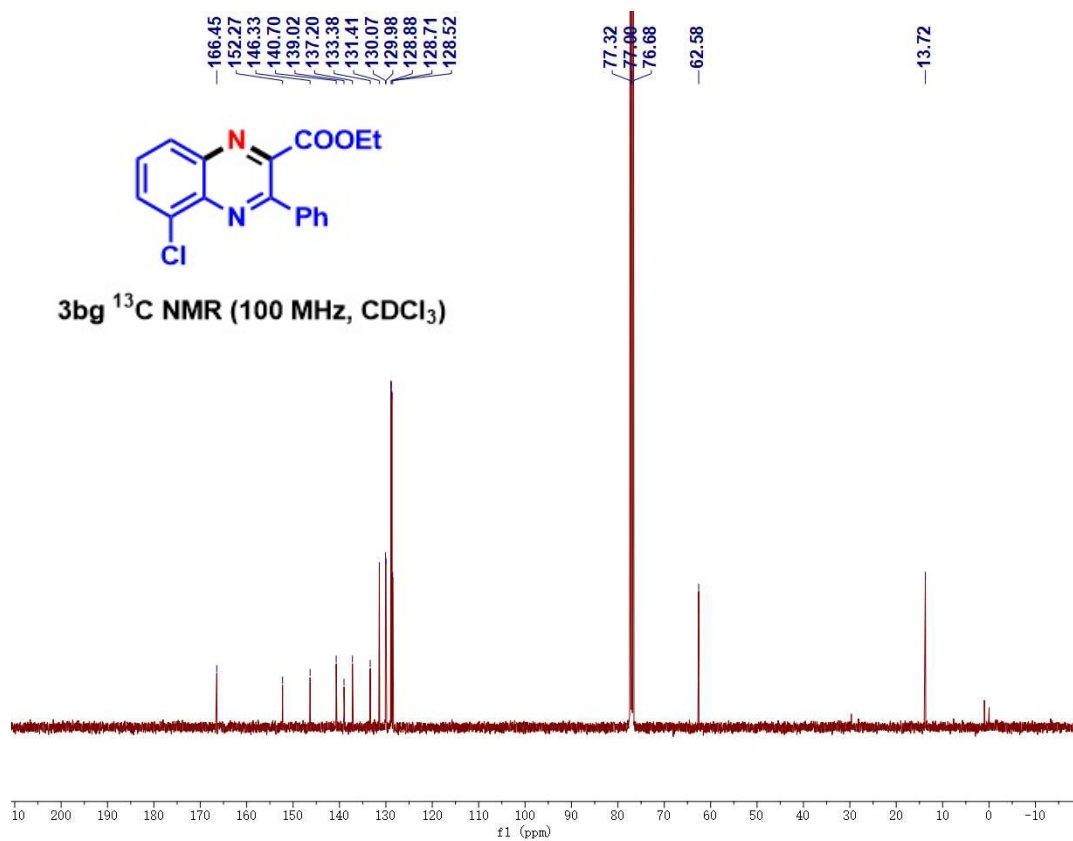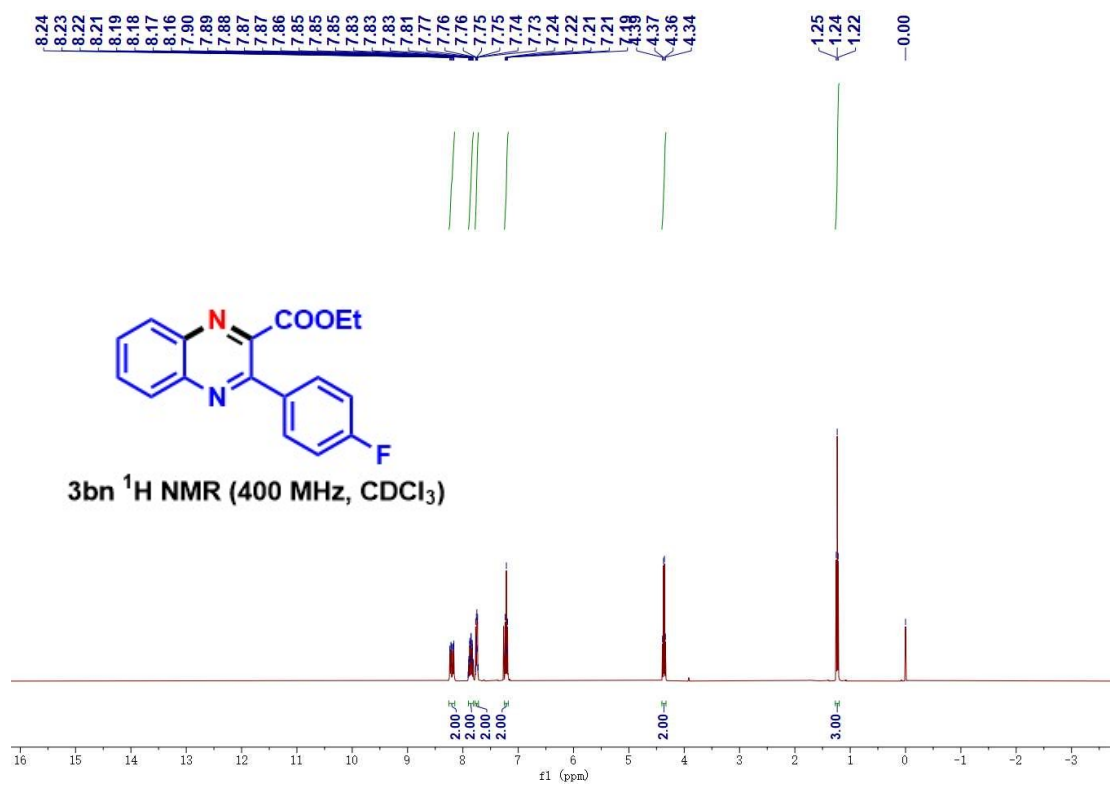

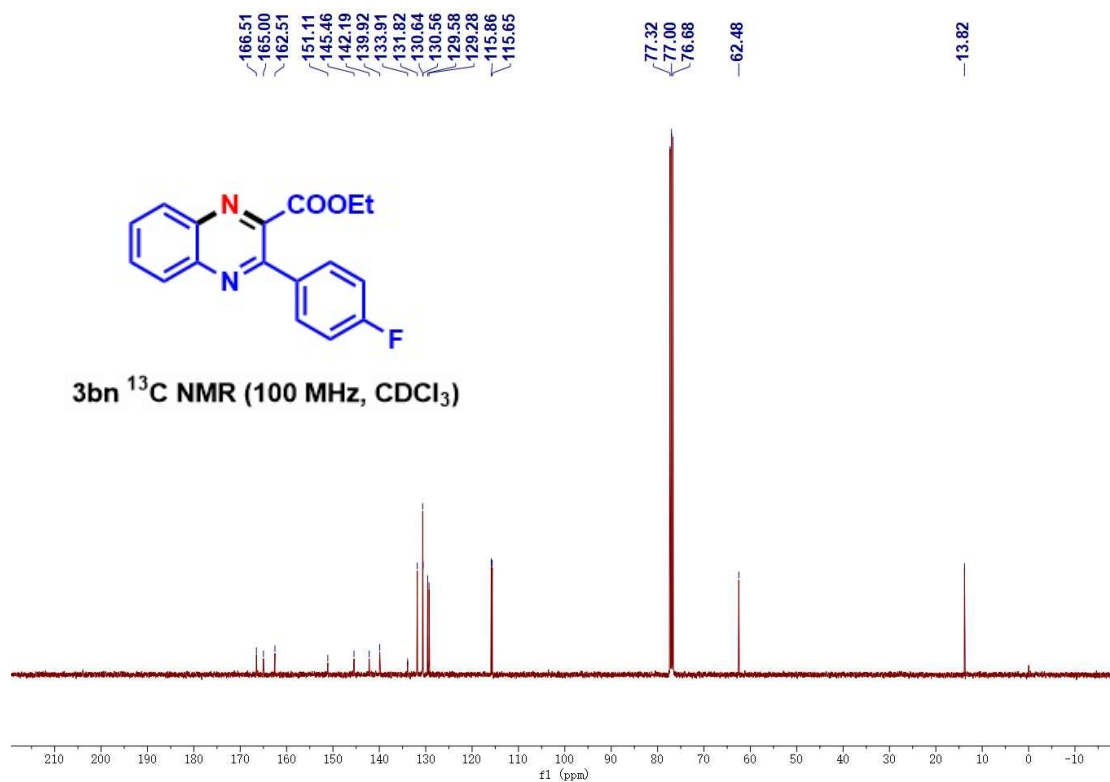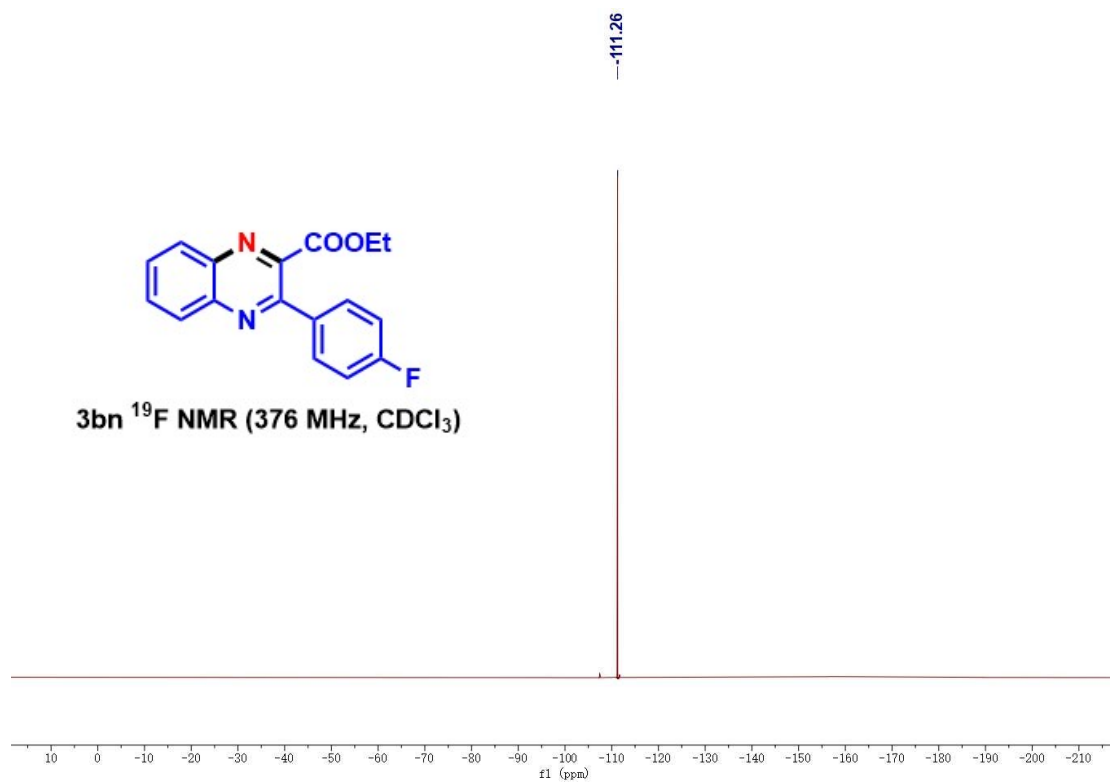

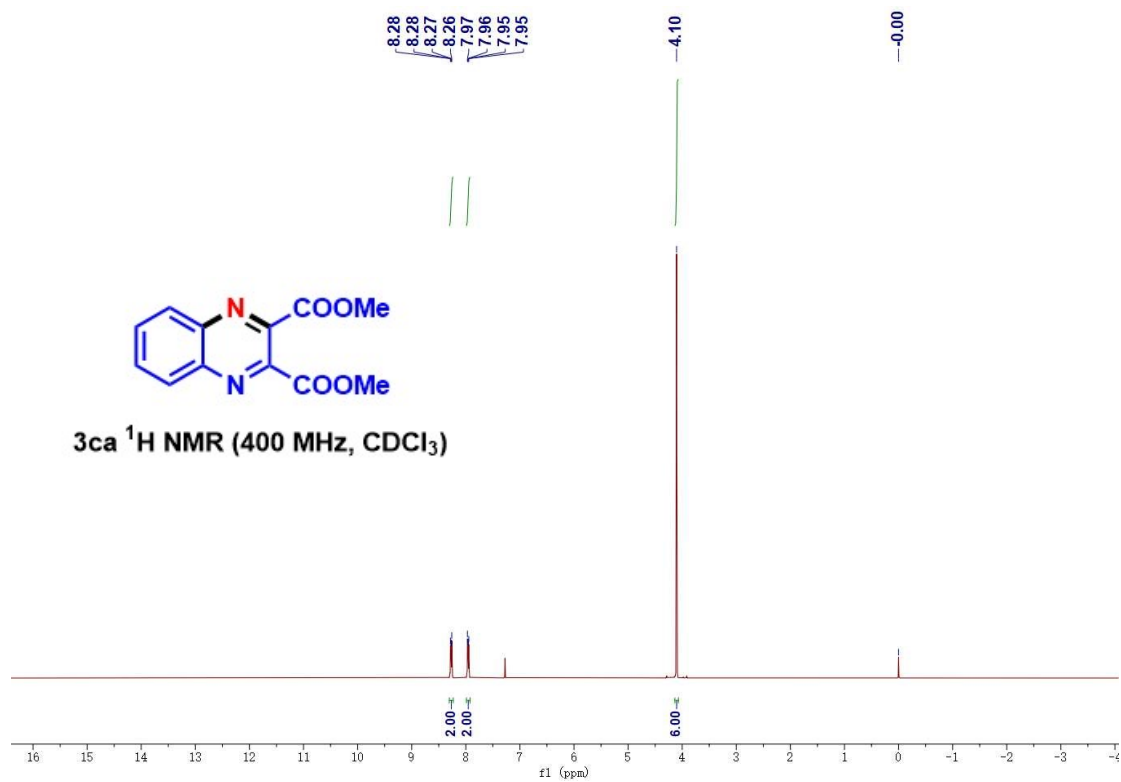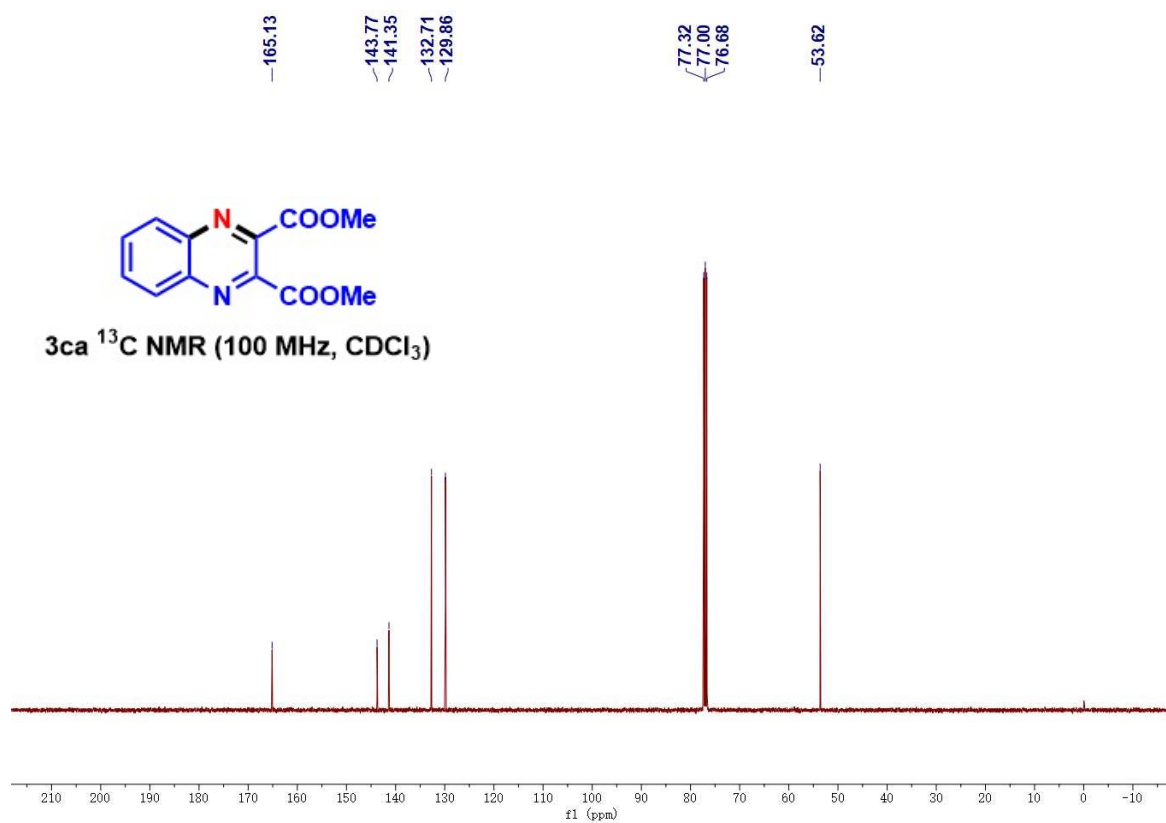

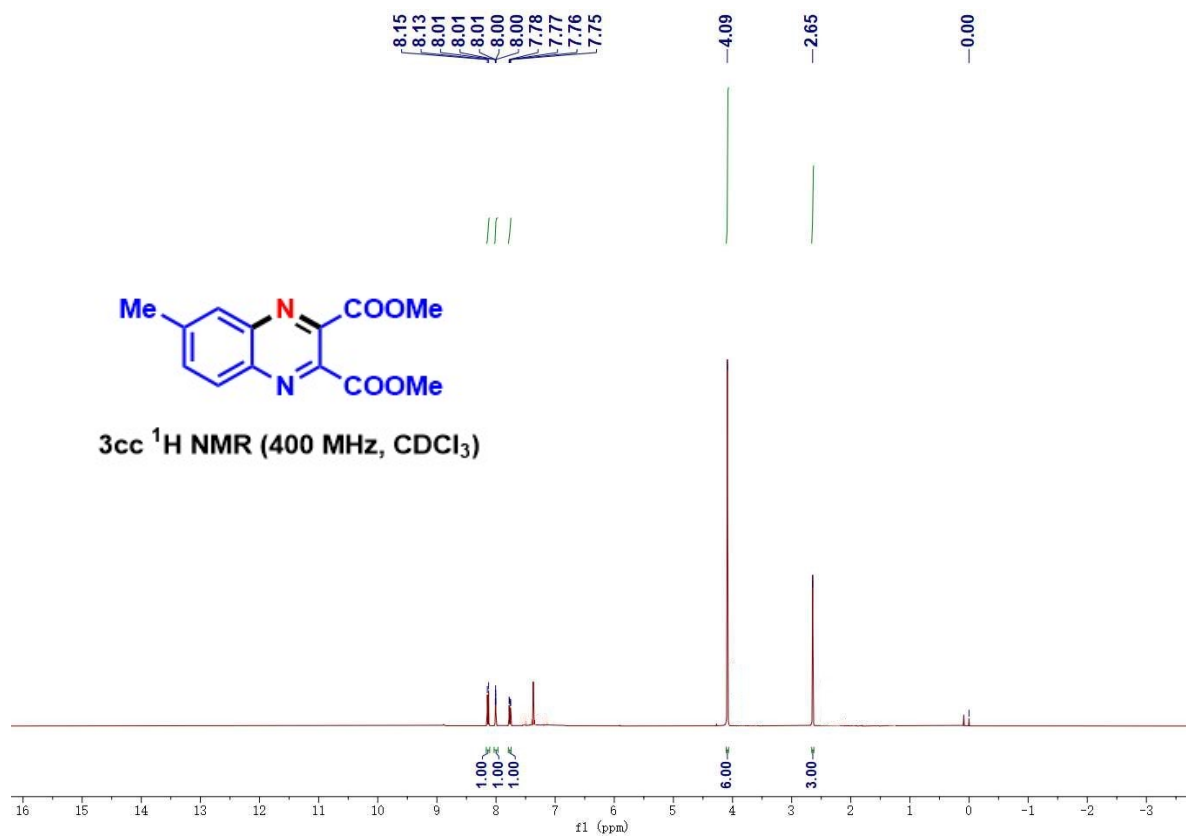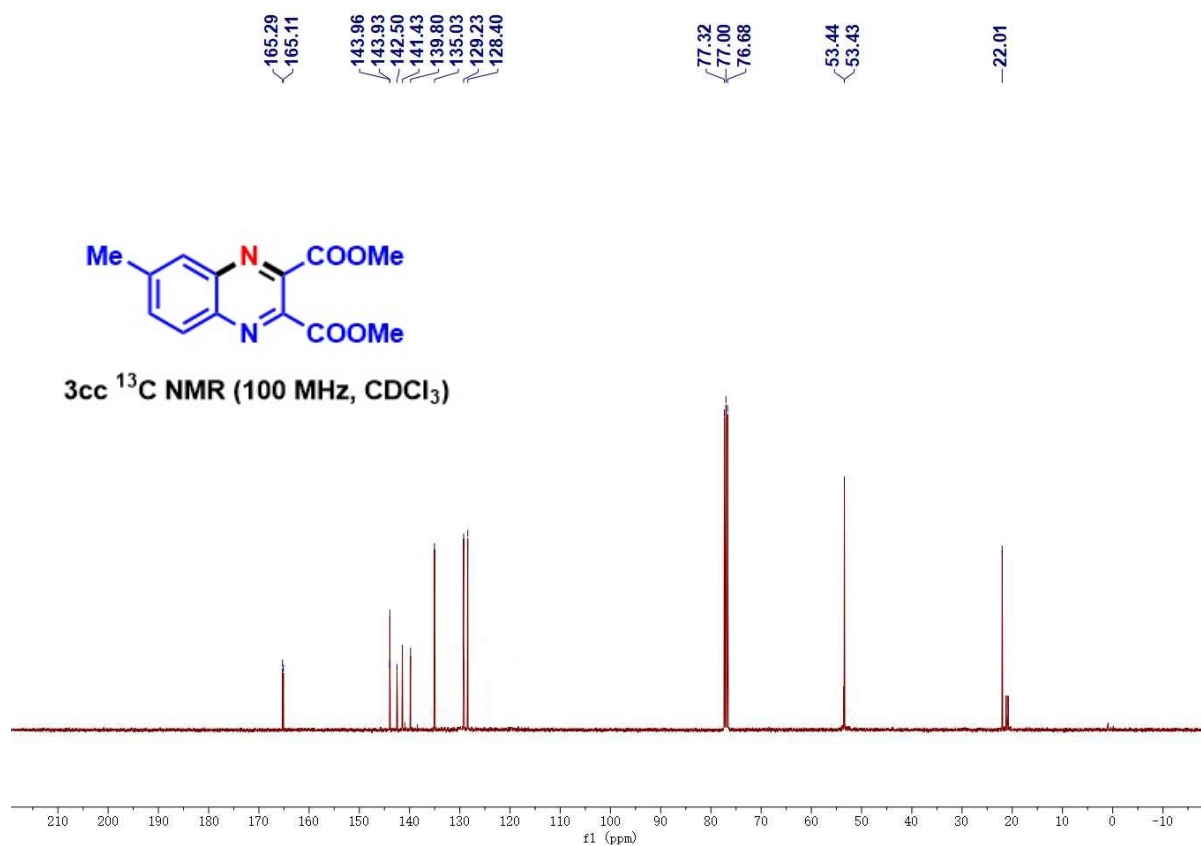

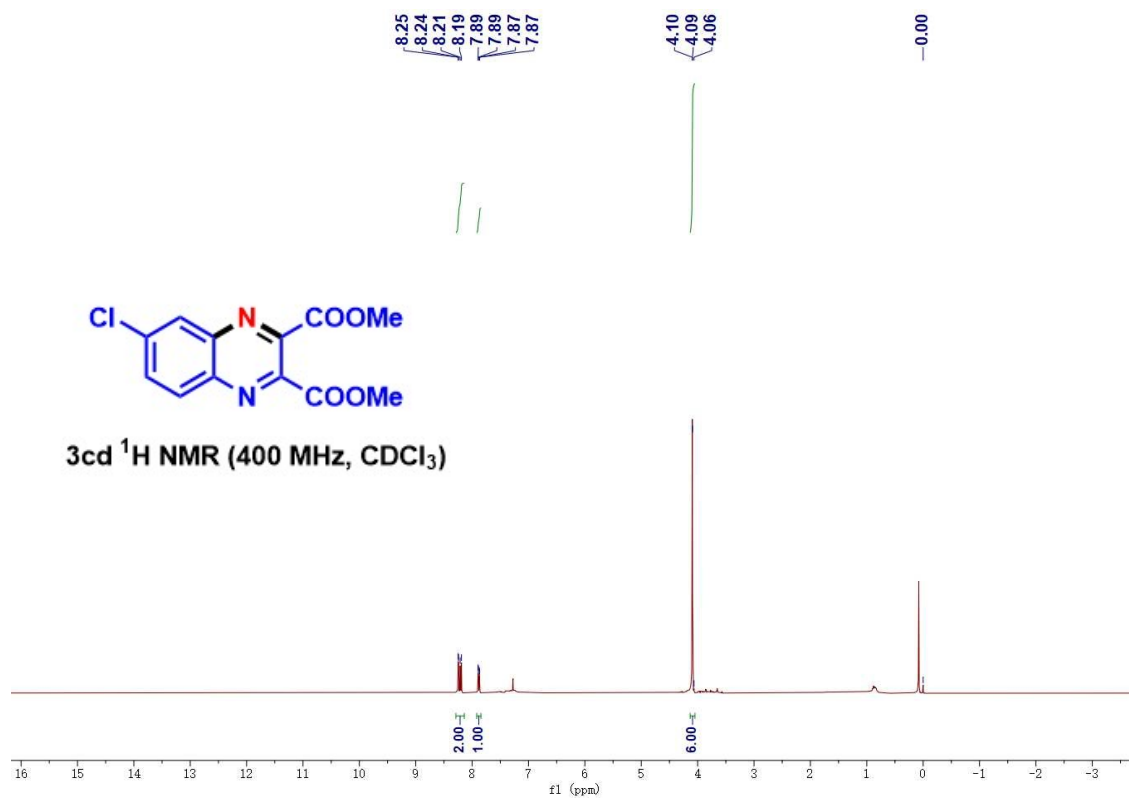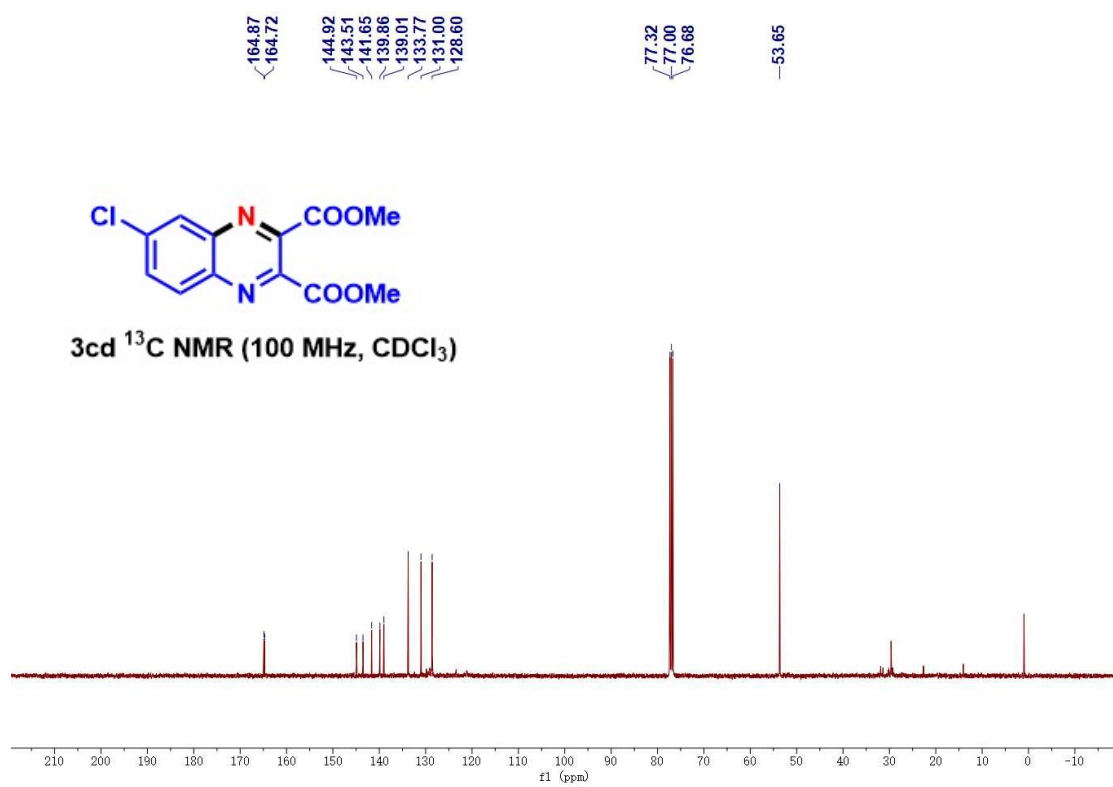



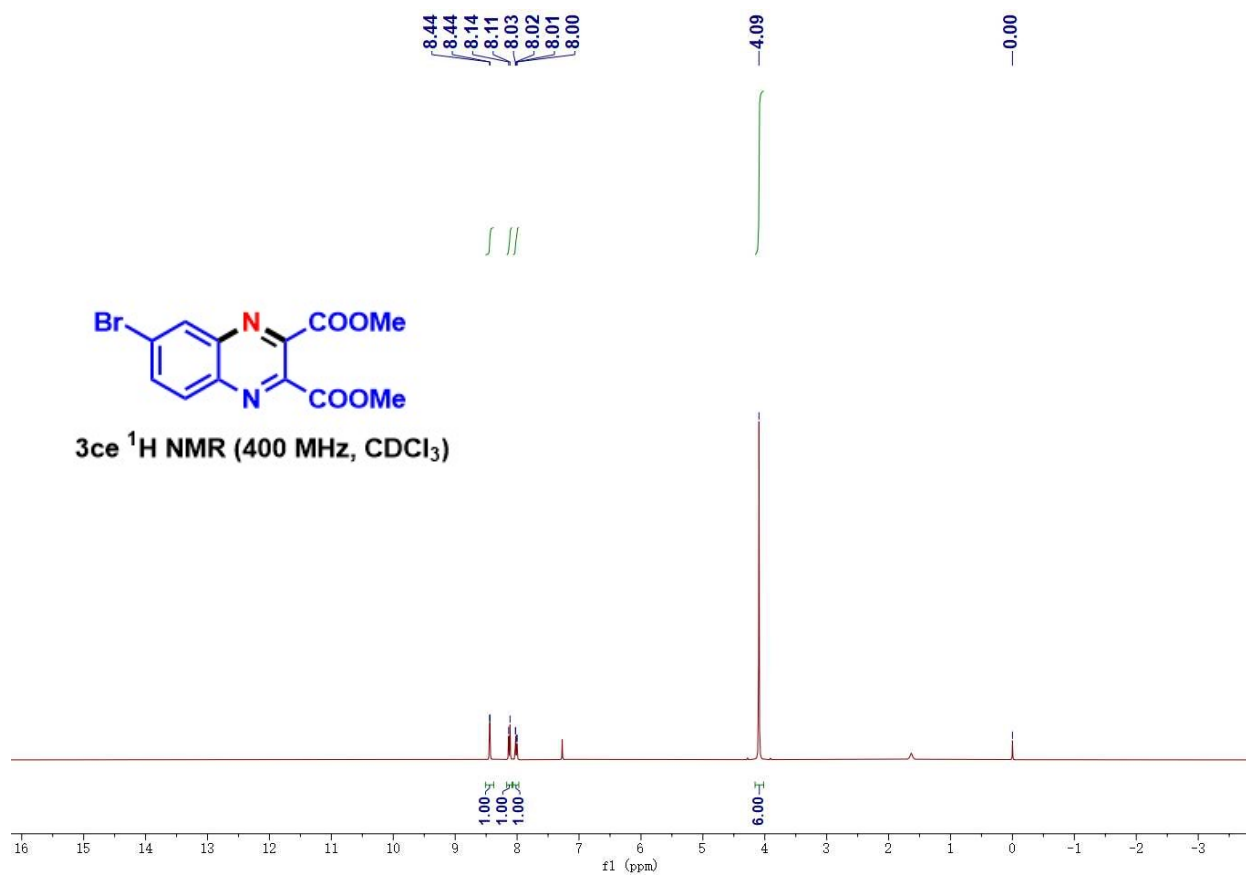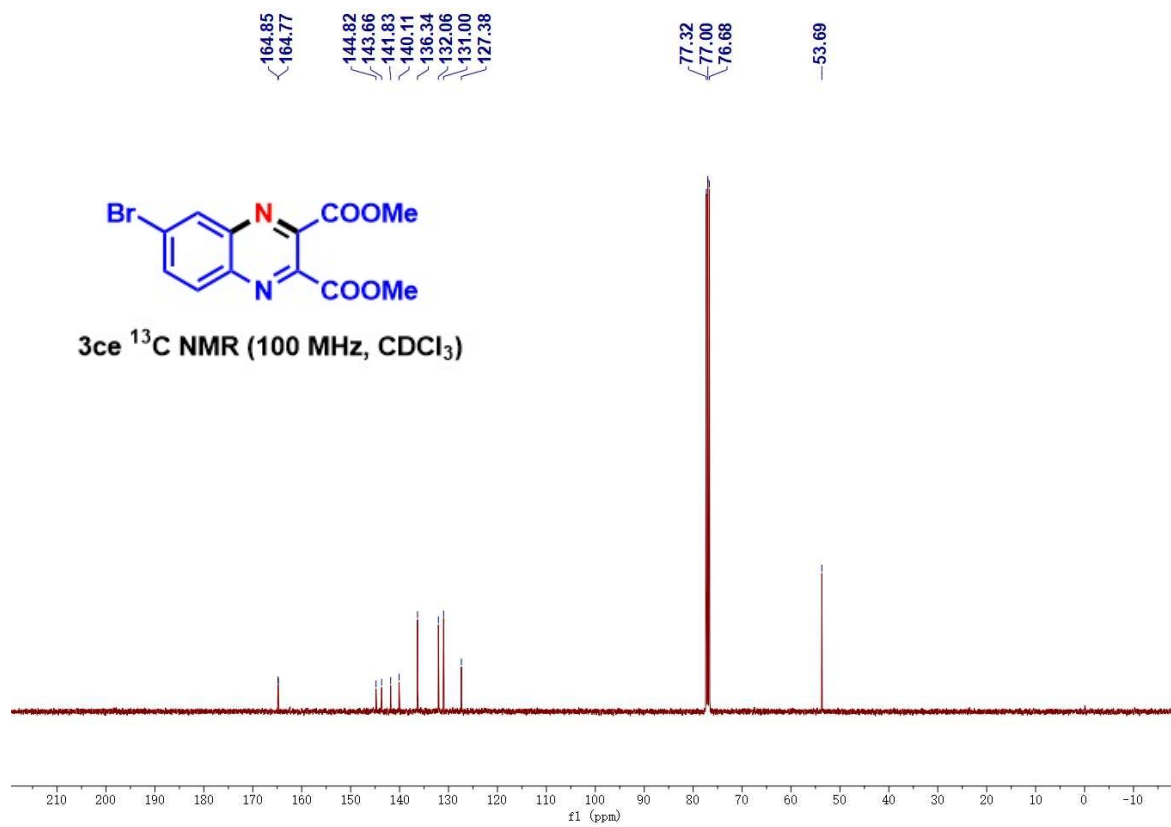

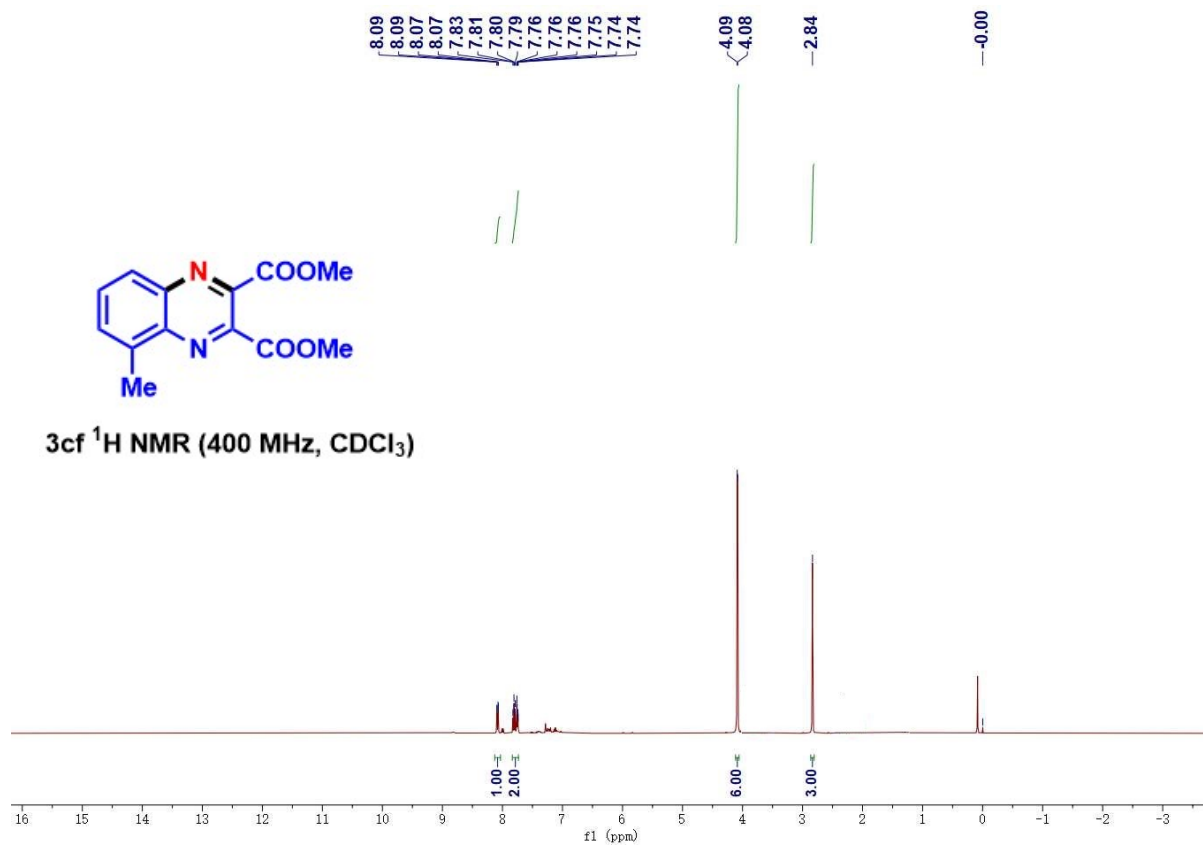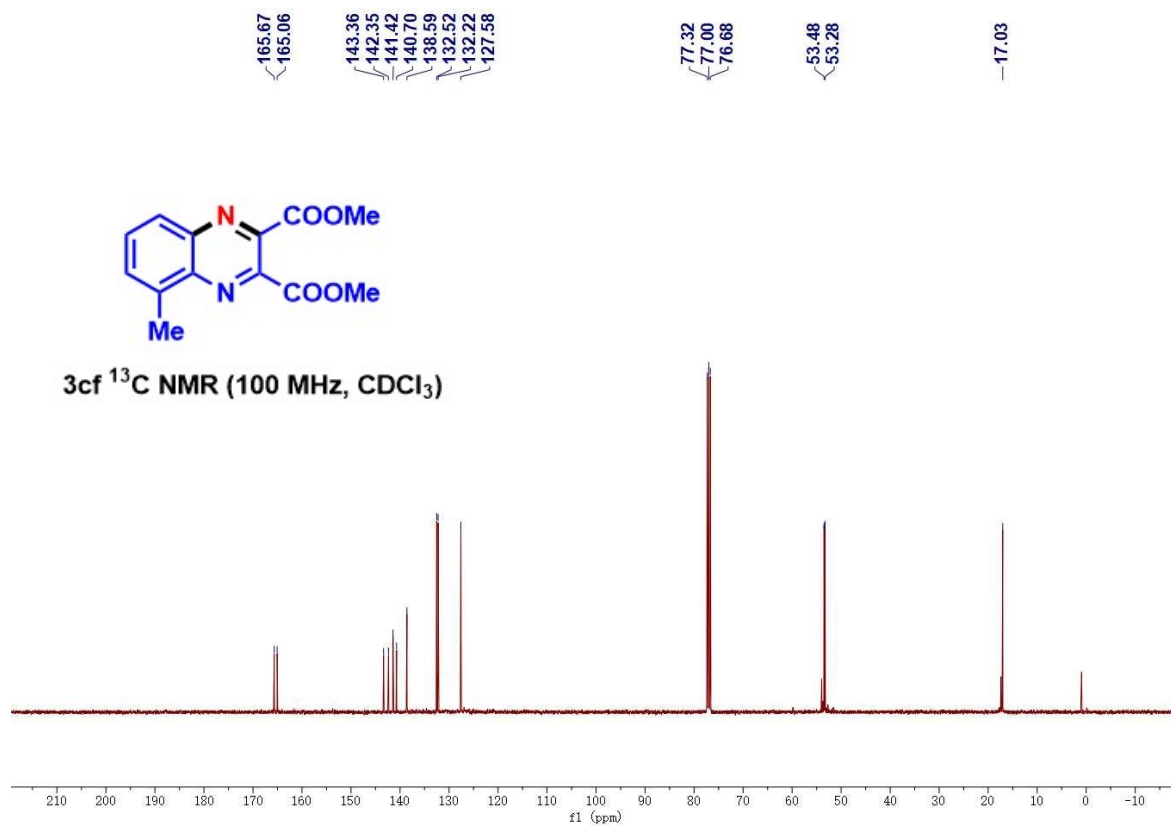

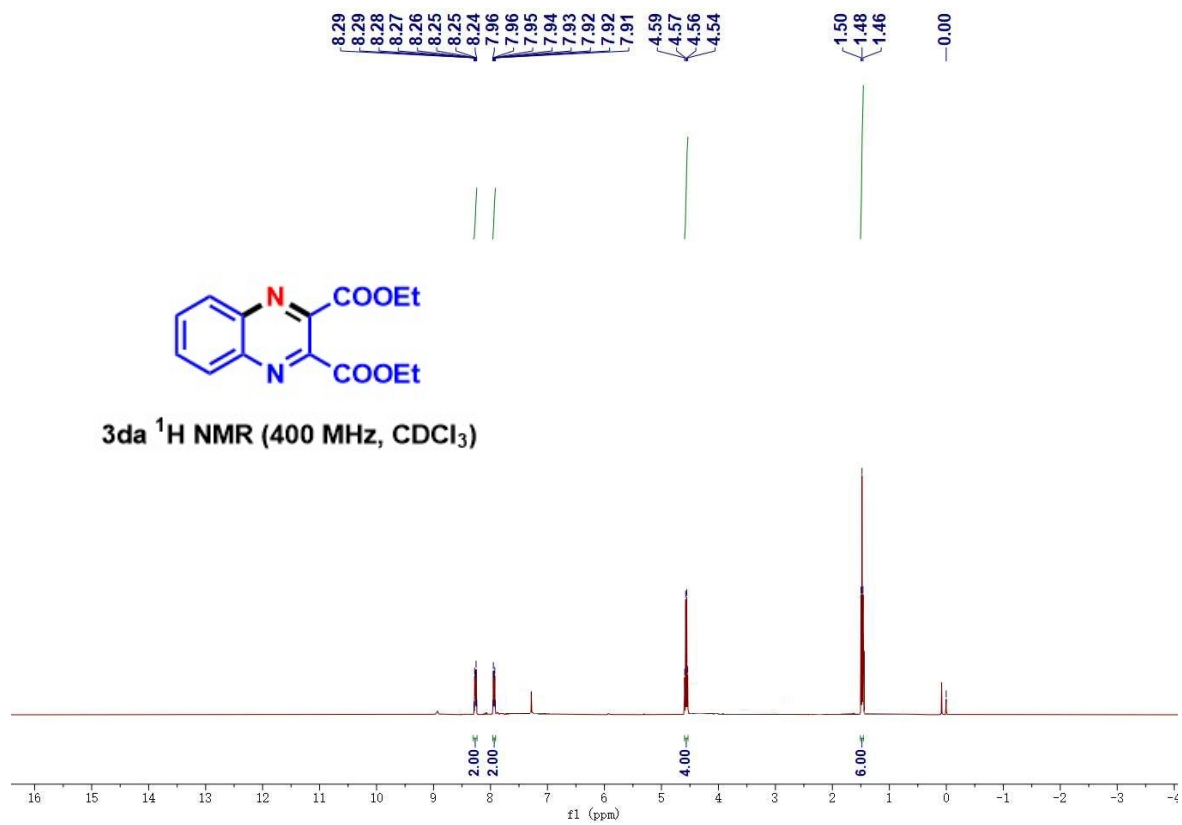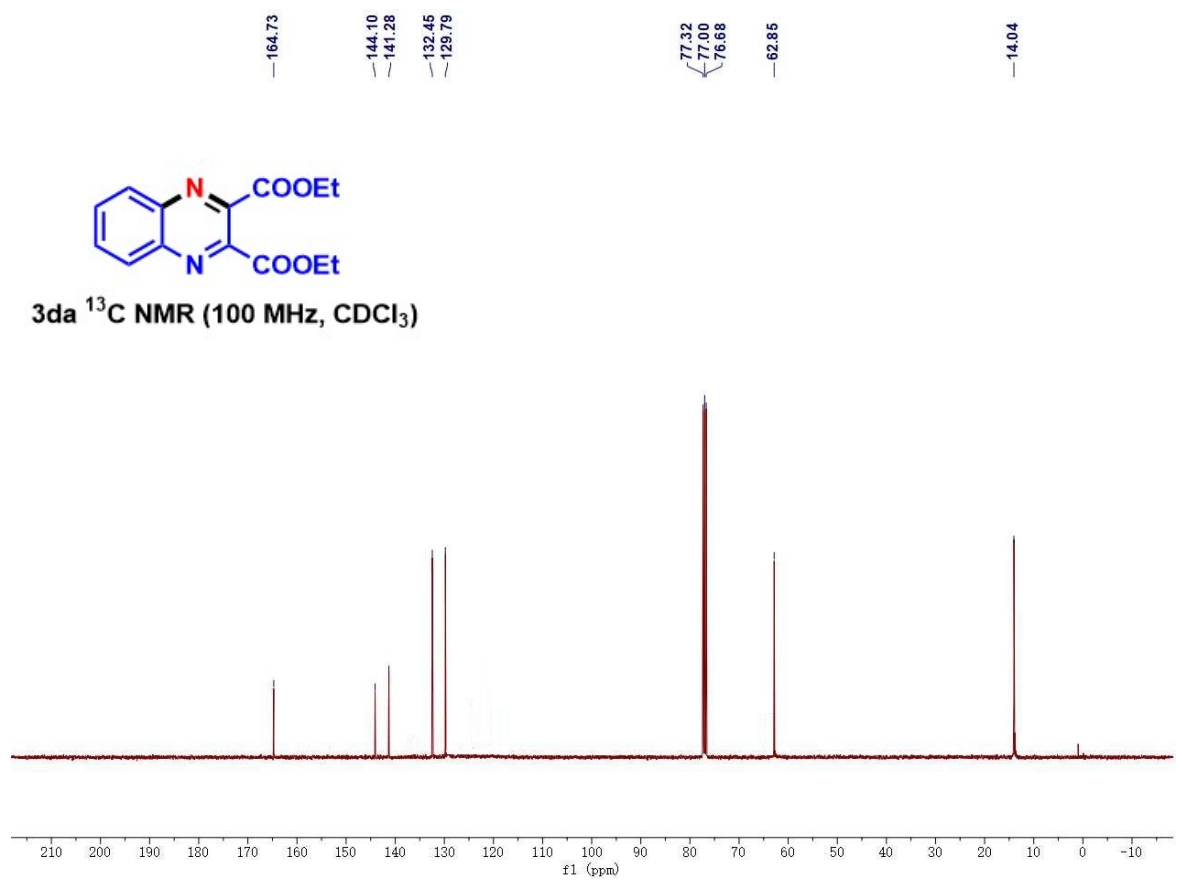

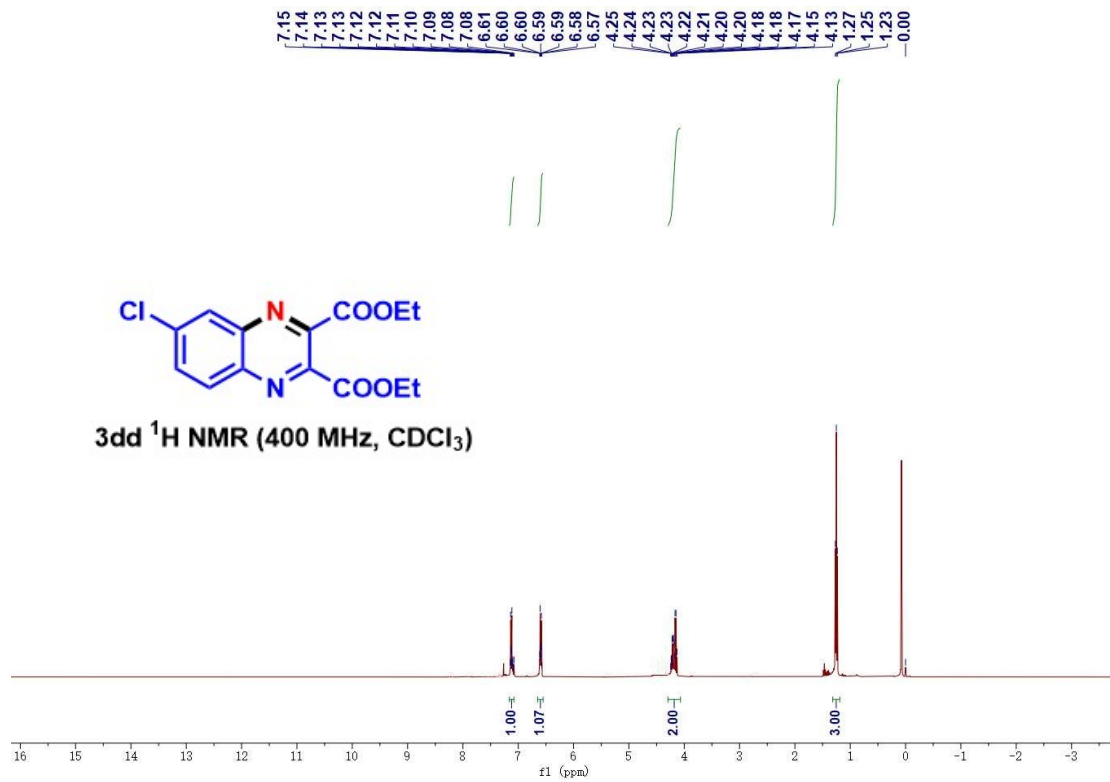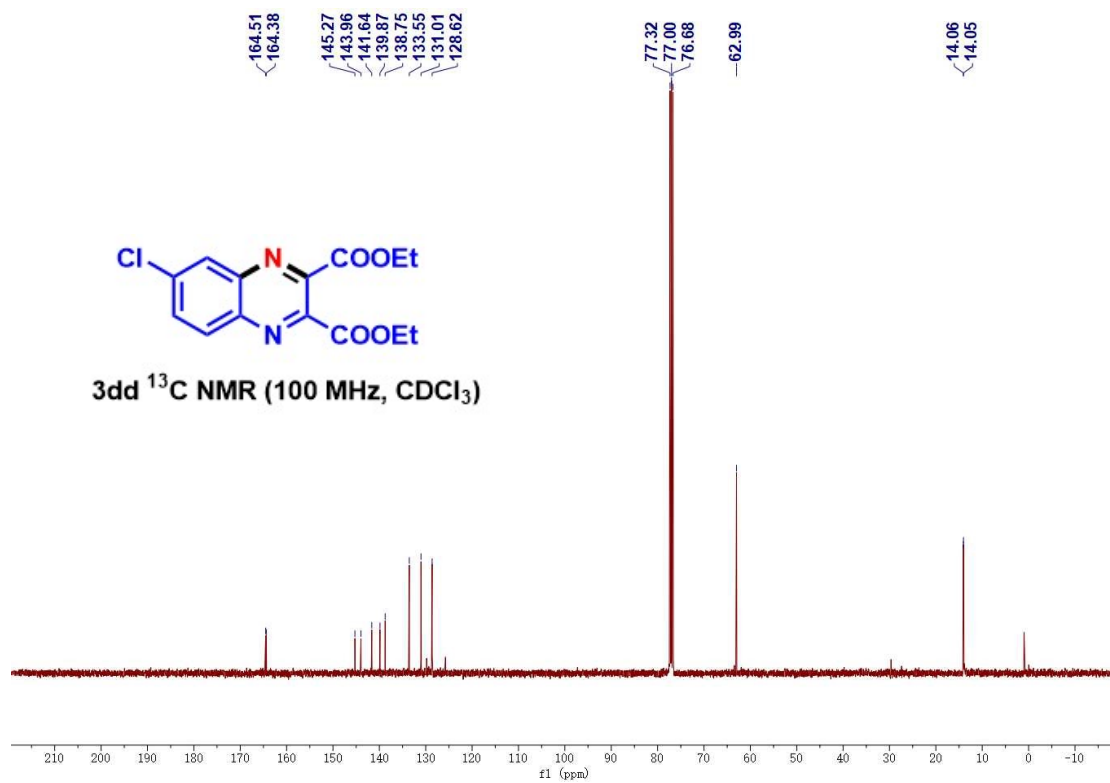

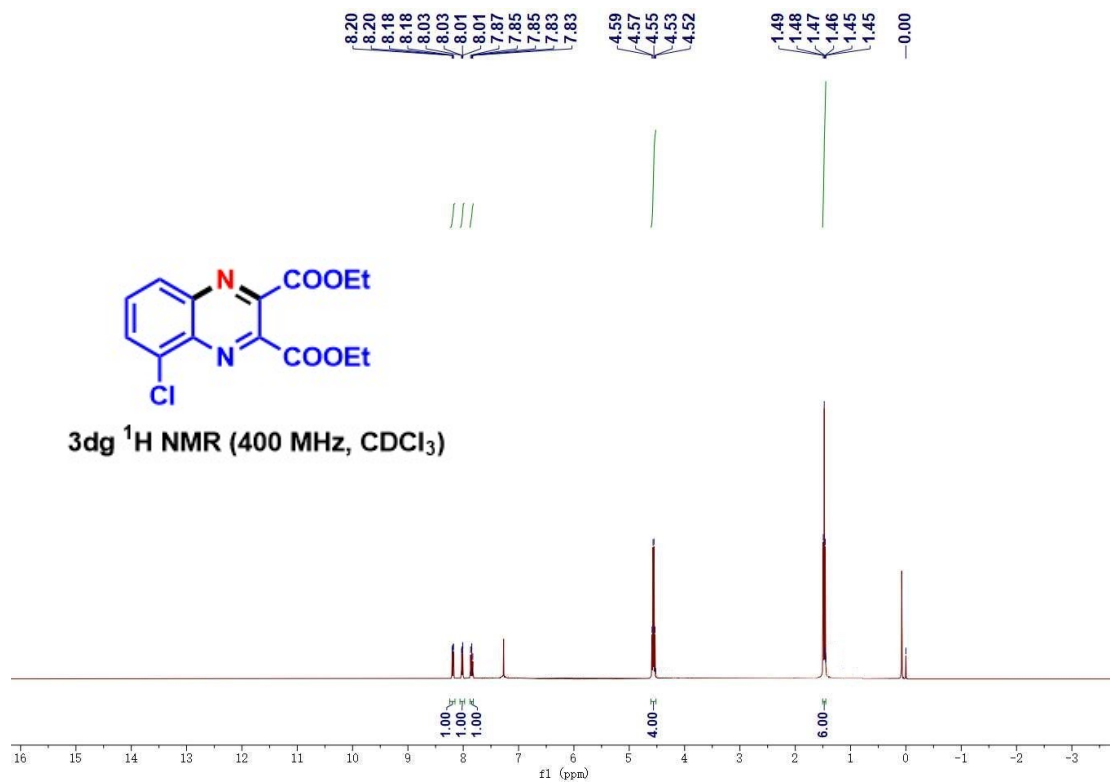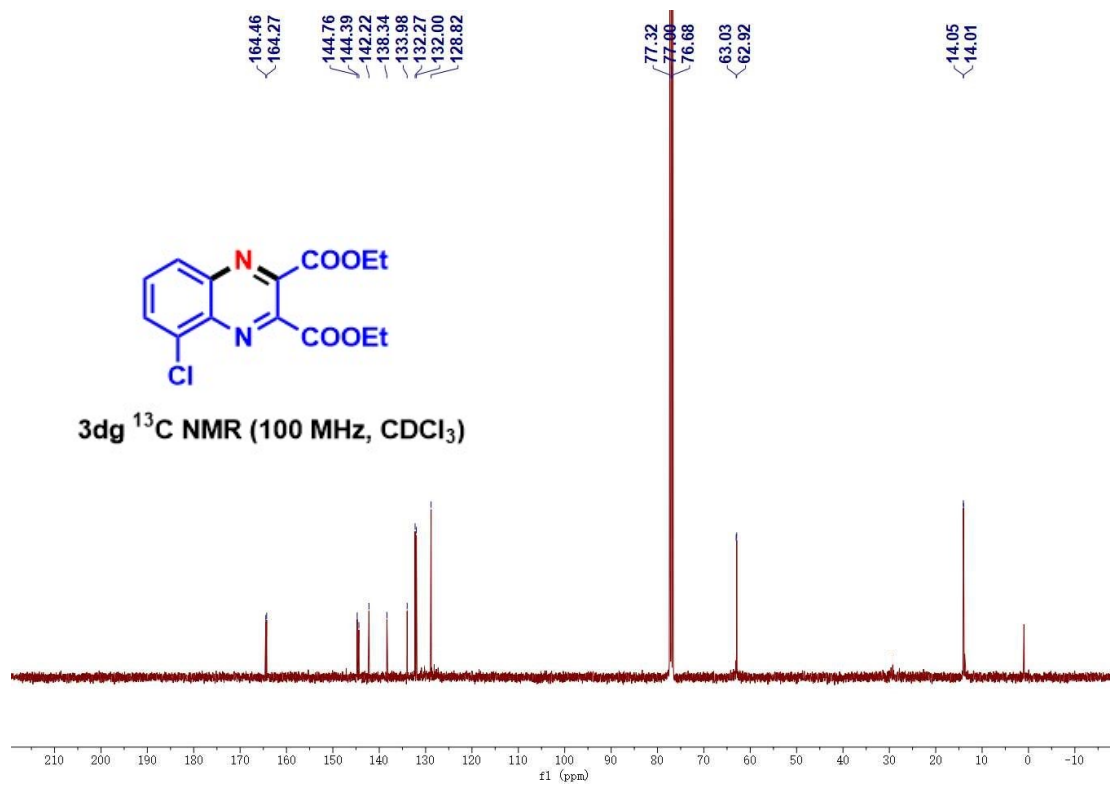

Supplement: d3ob00558e1.pdf [file d3ob00558e1.pdf]
